# Supplementary material for: Synthesis and Biological Evaluation of Thalidomide Derivatives as Potential Anti-Psoriasis Agents
Source: PubMed Central journal article supplement (PMC6212999; doi:10.3390/ijms19103061), 2018-10-07

TKW-5651a

Pulse Sequence: s2pul

UNITYplus-400 "unity400"

Date: Oct 14 2016

Solvent: DMSO

Ambient temperature

Total 64 repetitions

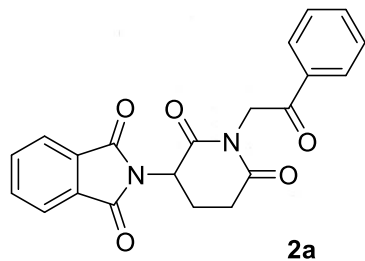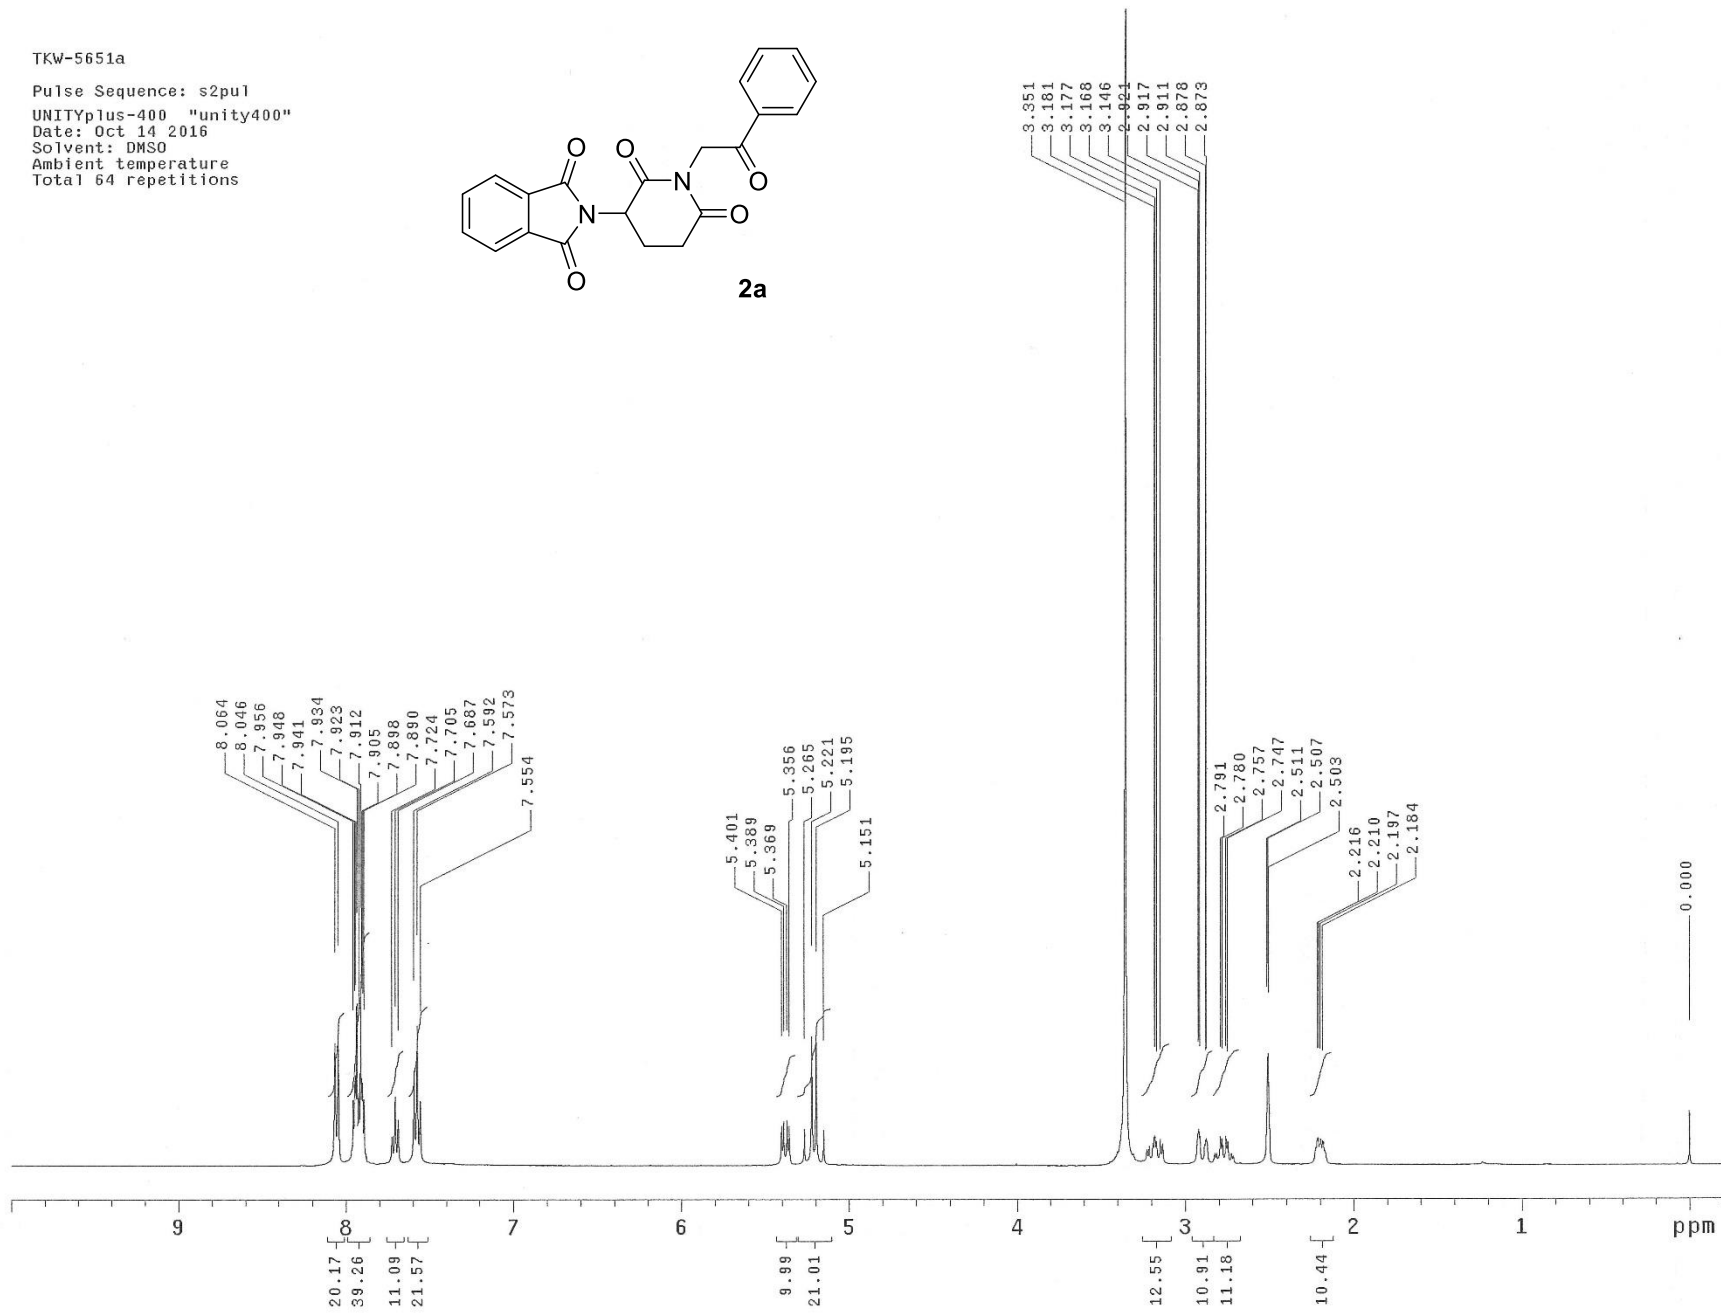

TKW-5651a

Pulse Sequence: s2pu1

UNITYplus-400 "unity400"

Date: Oct 14 2016

Solvent: DMSO

Ambient temperature

Total 2080 repetitions

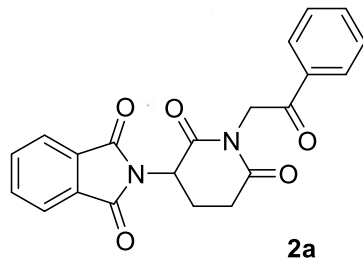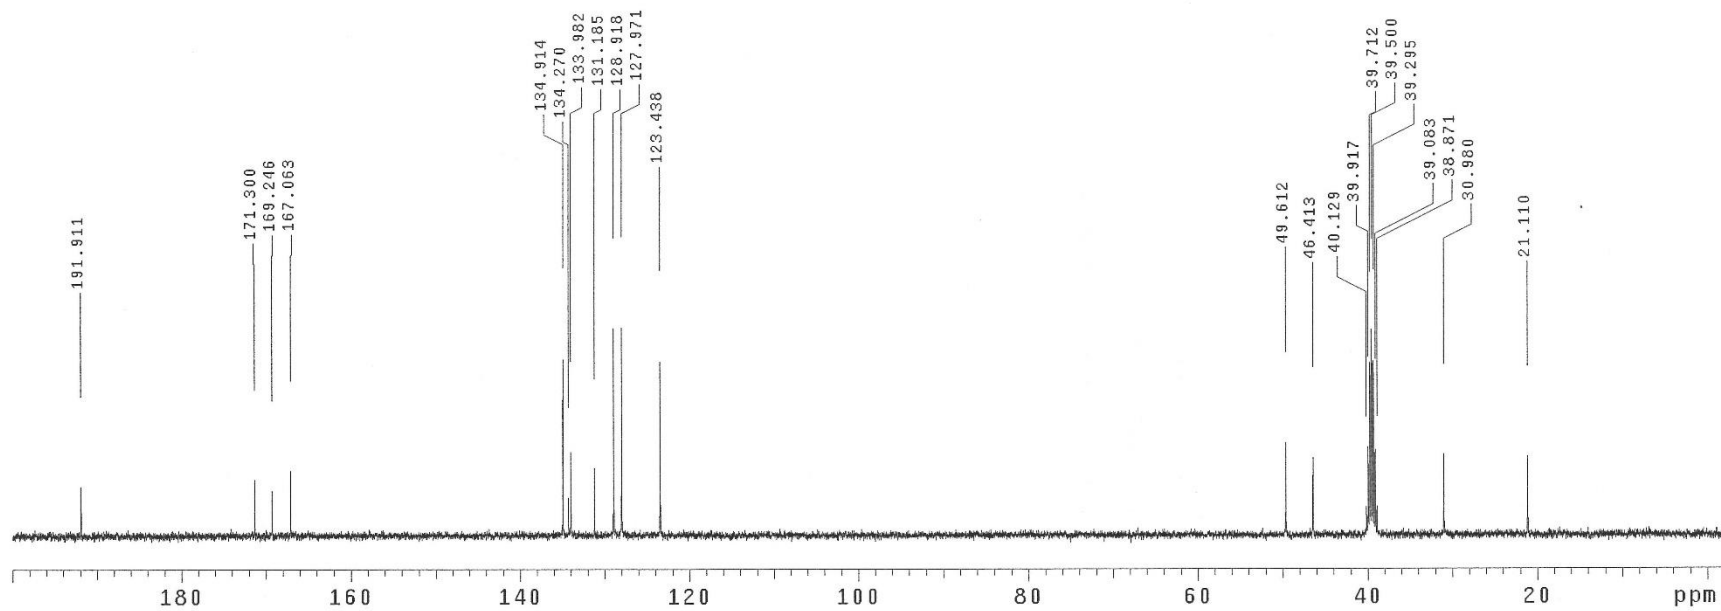

TKW-5652b

Pulse Sequence: s2pu1

UNITYplus-400 "unity400"

Date: Oct 14 2016

Solvent: DMSO

Ambient temperature

Total 32 repetitions

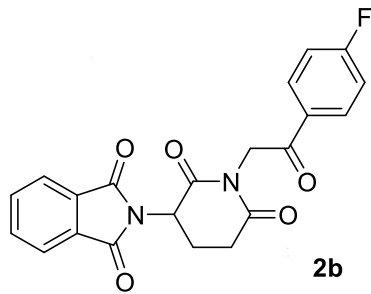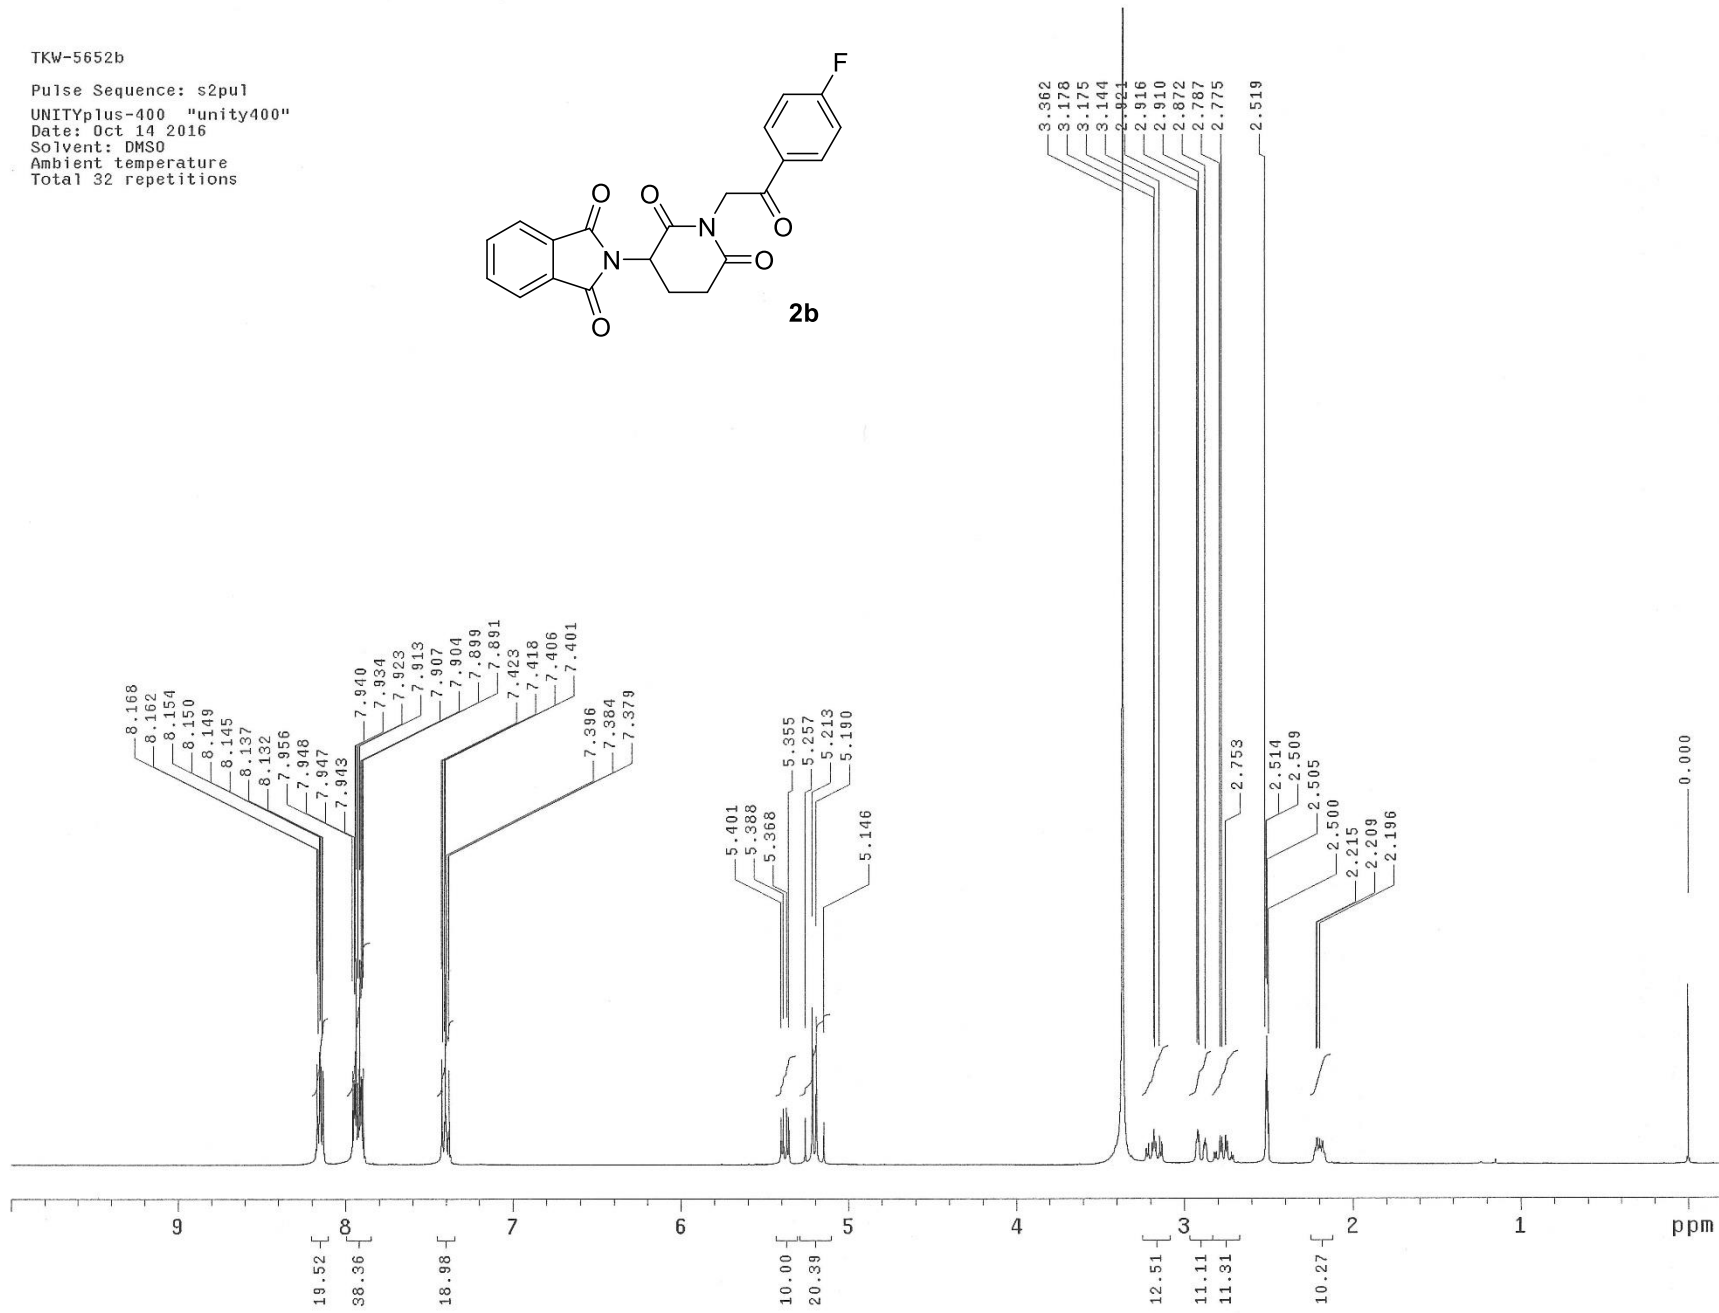

TKW-5652b

Pulse Sequence: s2pu1

UNITYplus-400 "unity400"

Date: Oct 14 2016

Solvent: DMSO

Ambient temperature

Total 3264 repetitions

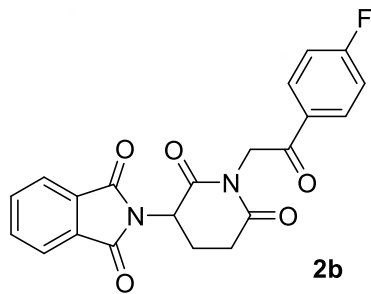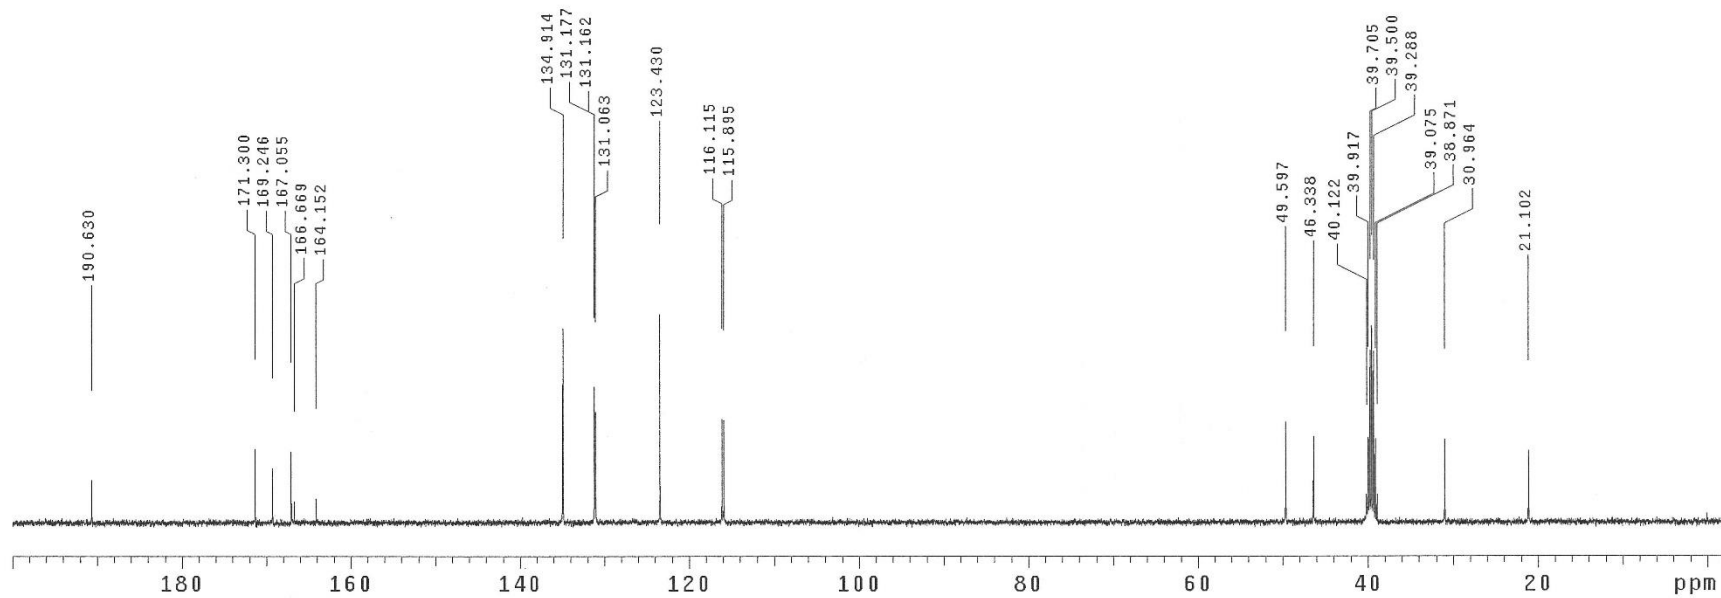

TKW-5683g

Pulse Sequence: s2pul

UNITYplus-400 "unity400"

Date: Nov 15 2016

Solvent: DMSO

Ambient temperature

Total 64 repetitions

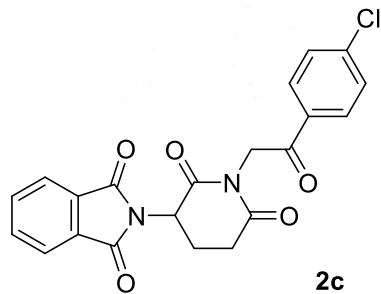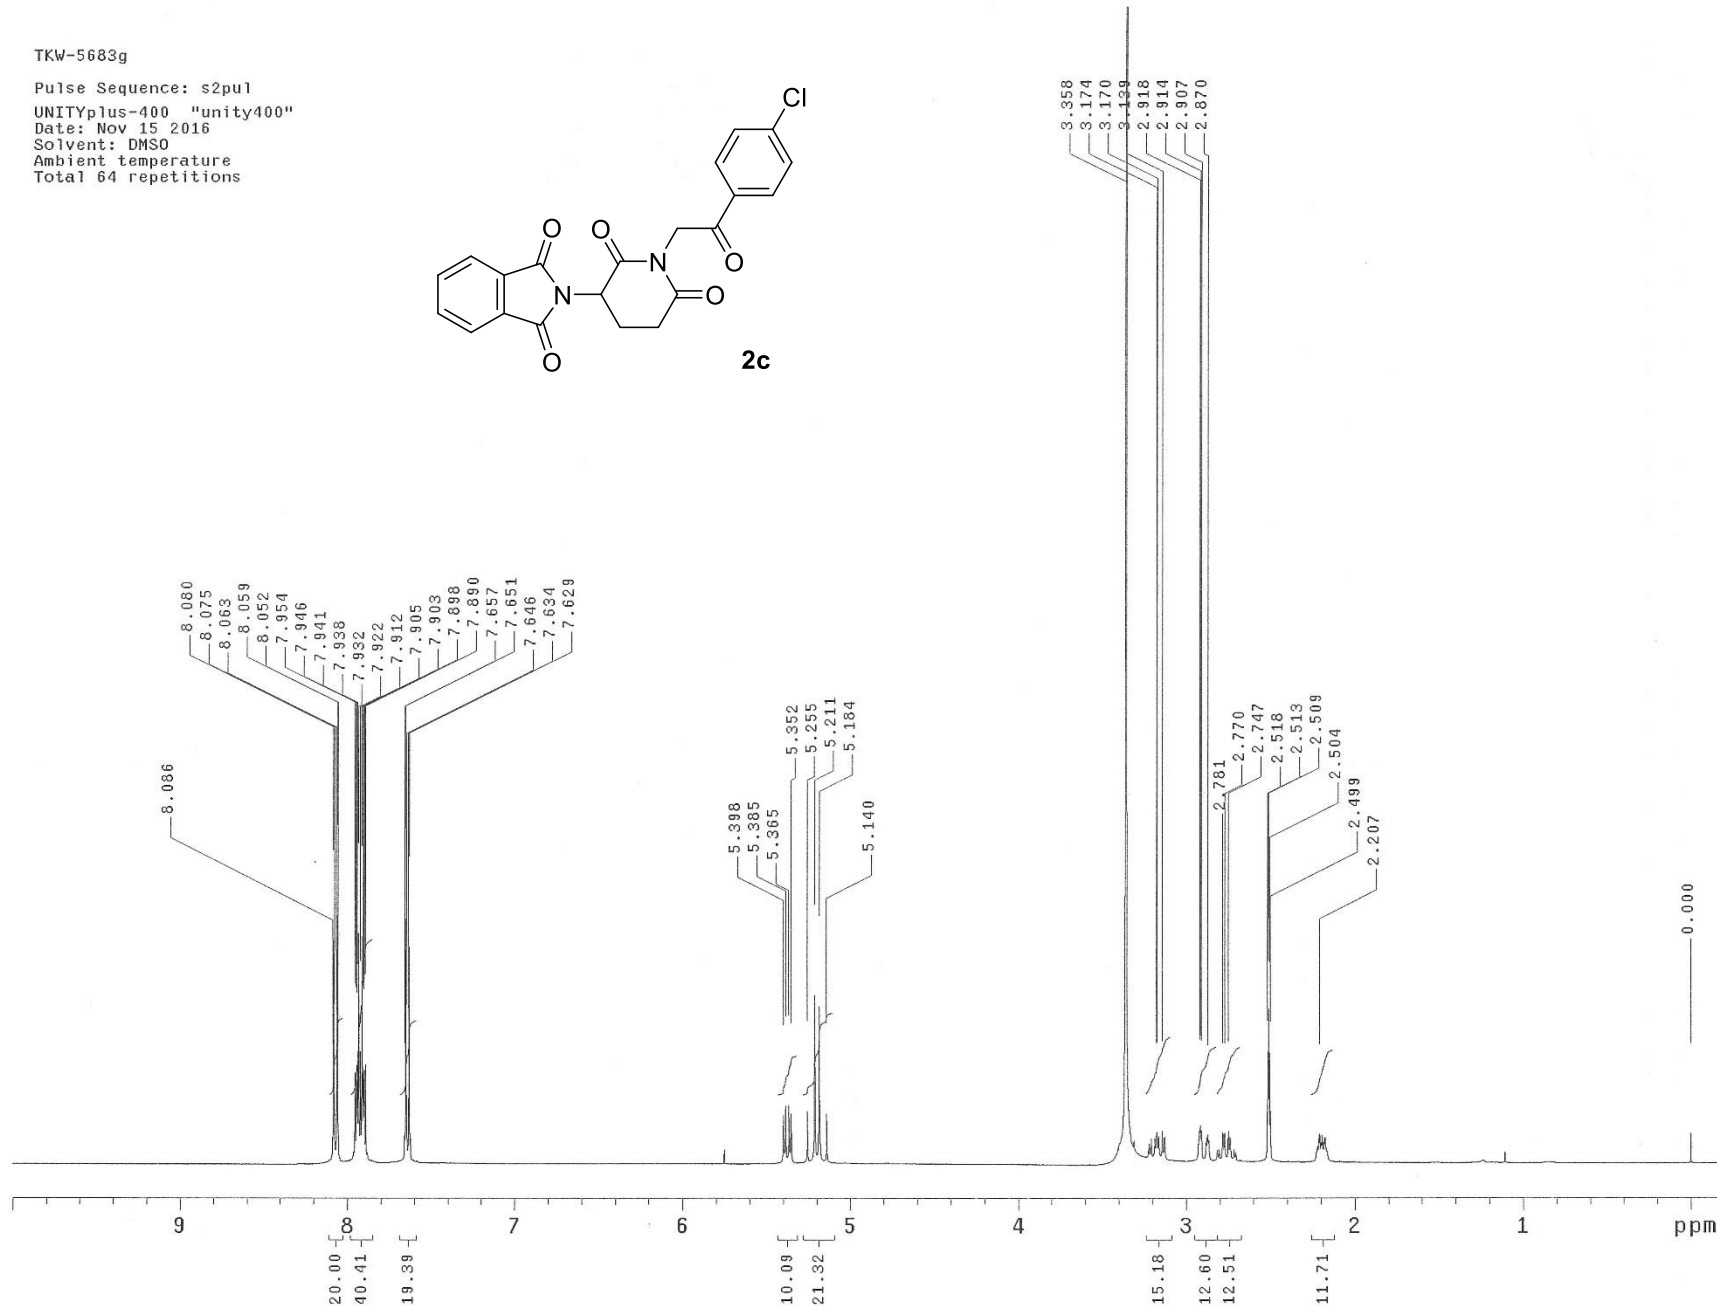

TKW-5683g

Pulse Sequence: s2pu1

UNITYplus-400 "unity400"

Date: Nov 15 2016

Solvent: DMSO

Ambient temperature

Total 4736 repetitions

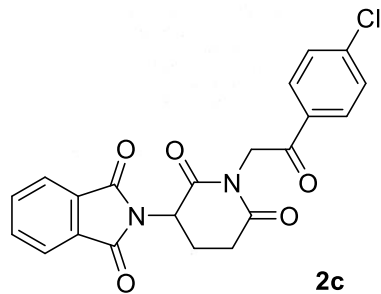

2c

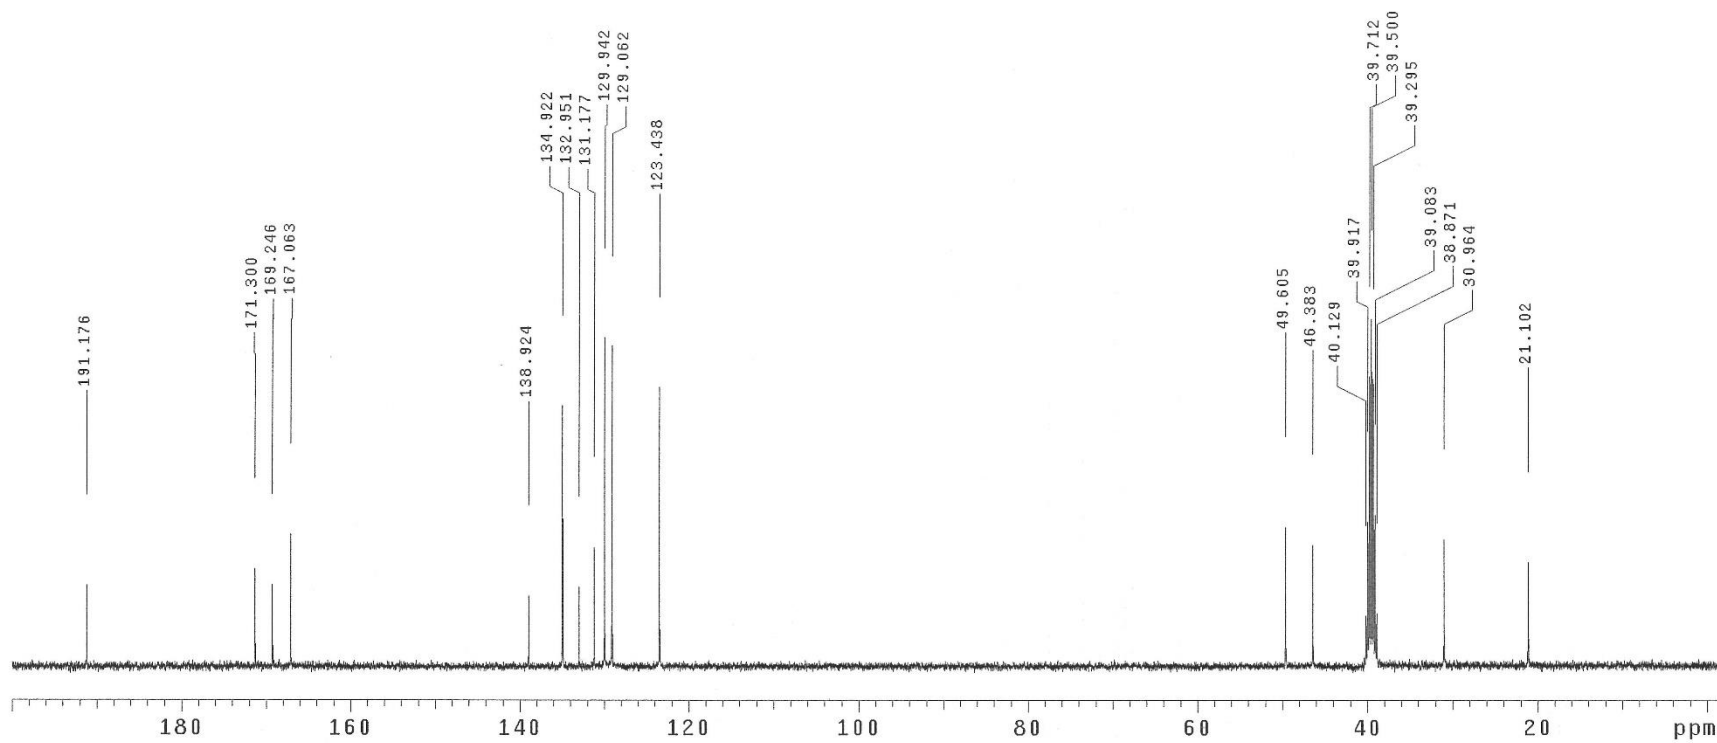

TKW-5661k

Pulse Sequence: s2pu1

UNITYplus-400 "unity400"

Date: Jun 2 2016

Solvent: DMSO

Ambient temperature

Total 64 repetitions

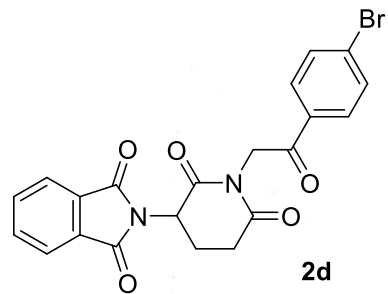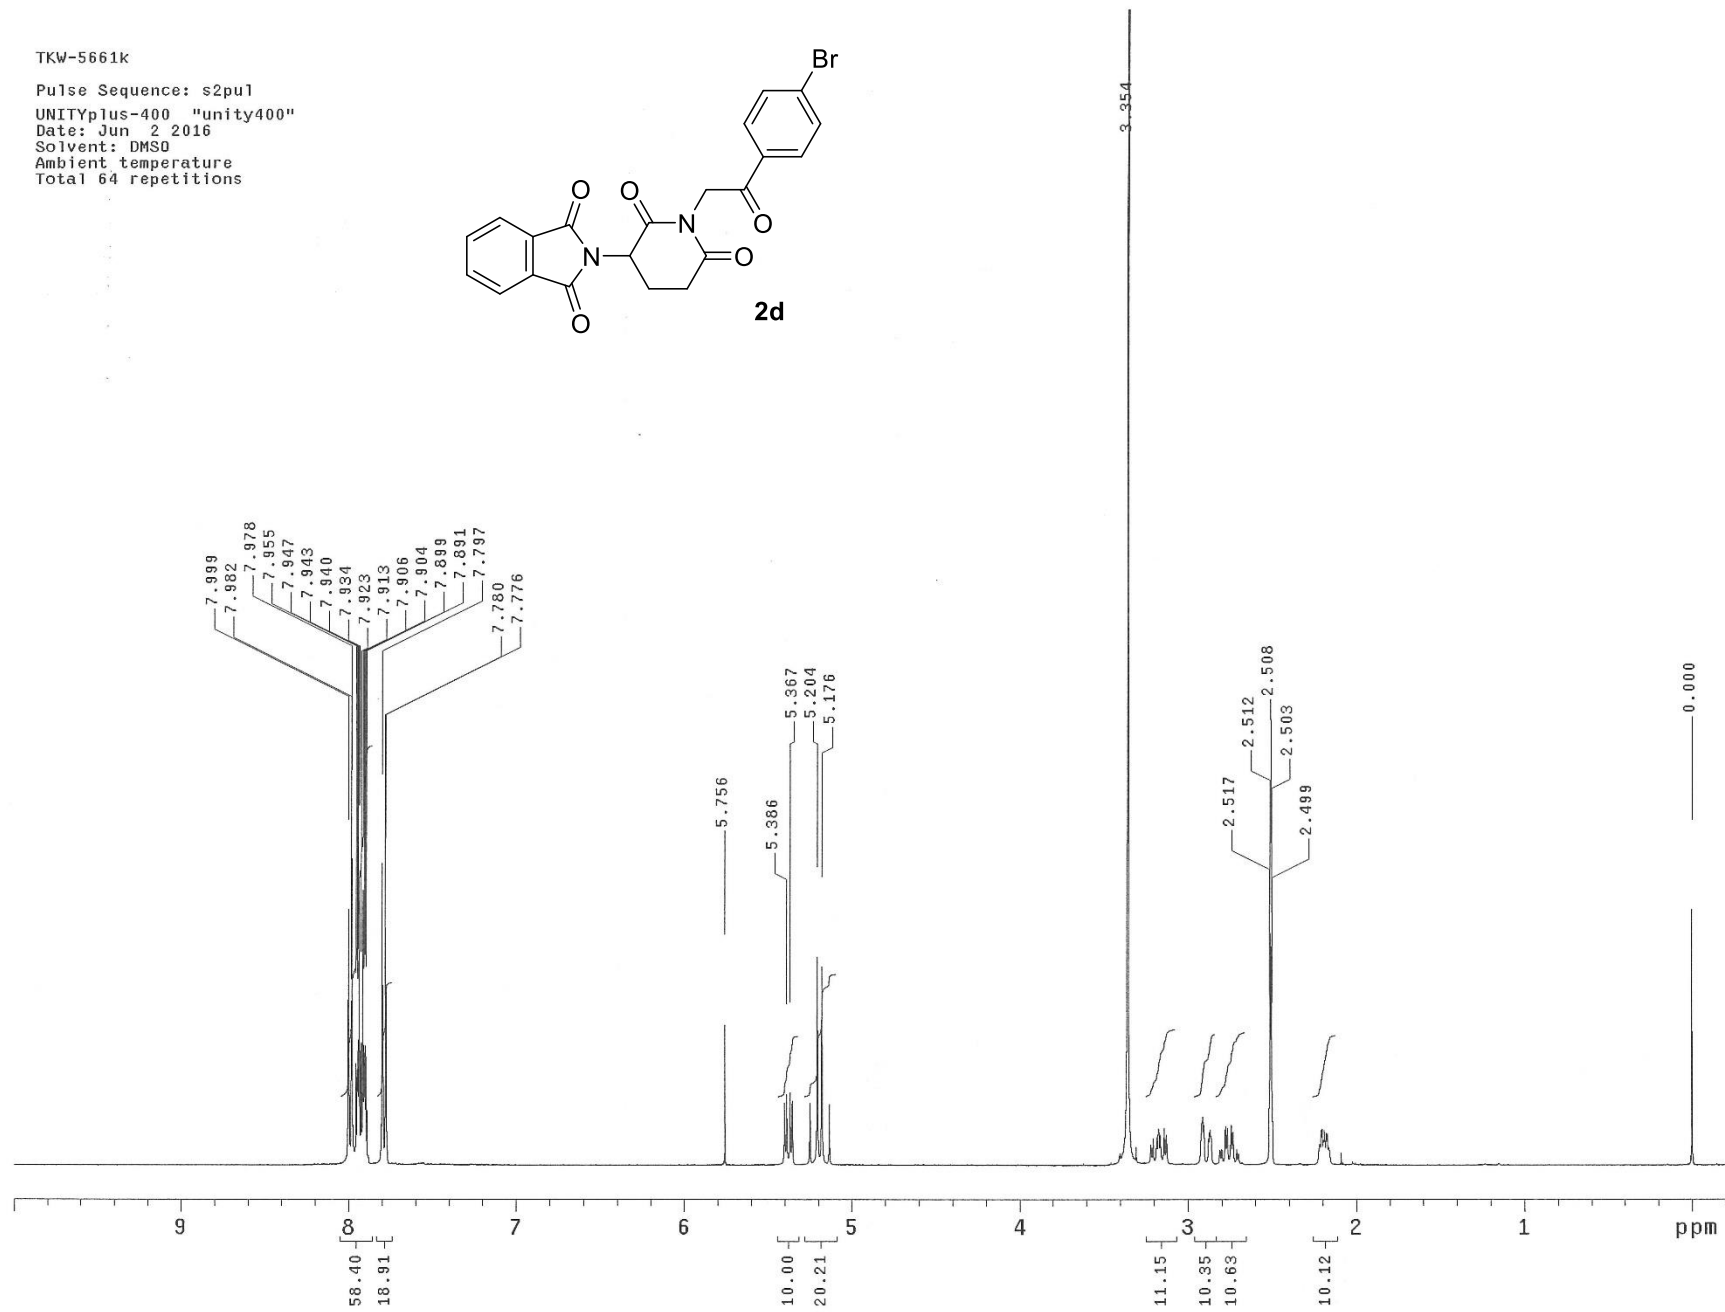

TKW-5661k

Pulse Sequence: s2pu1  
UNITYplus-400 "unity400"  
Date: Jun 2 2016  
Solvent: DMSO  
Ambient temperature  
Total 1664 repetitions

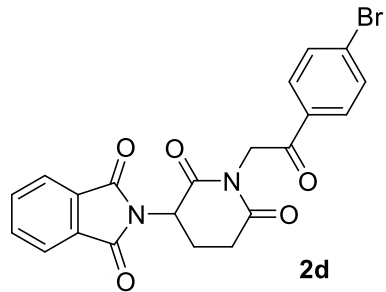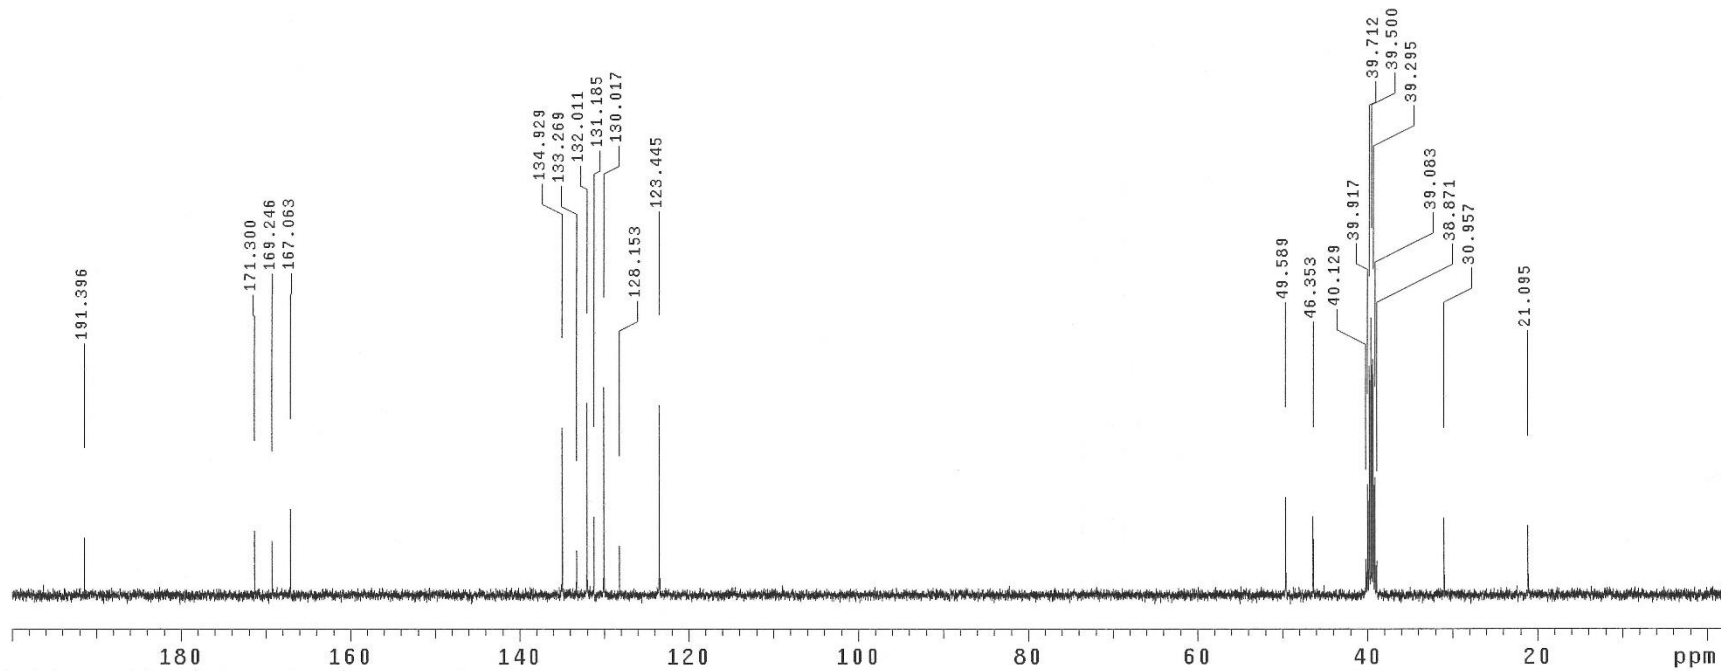



TKW-5653c

Pulse Sequence: s2pu1

UNITYplus-400 "unity400"

Date: Oct 14 2016

Solvent: DMSO

Ambient temperature

Total 32 repetitions

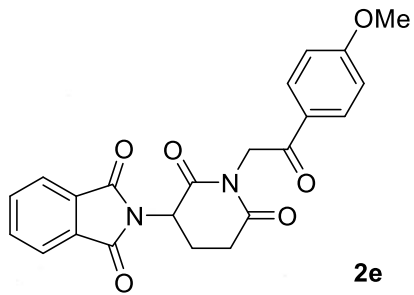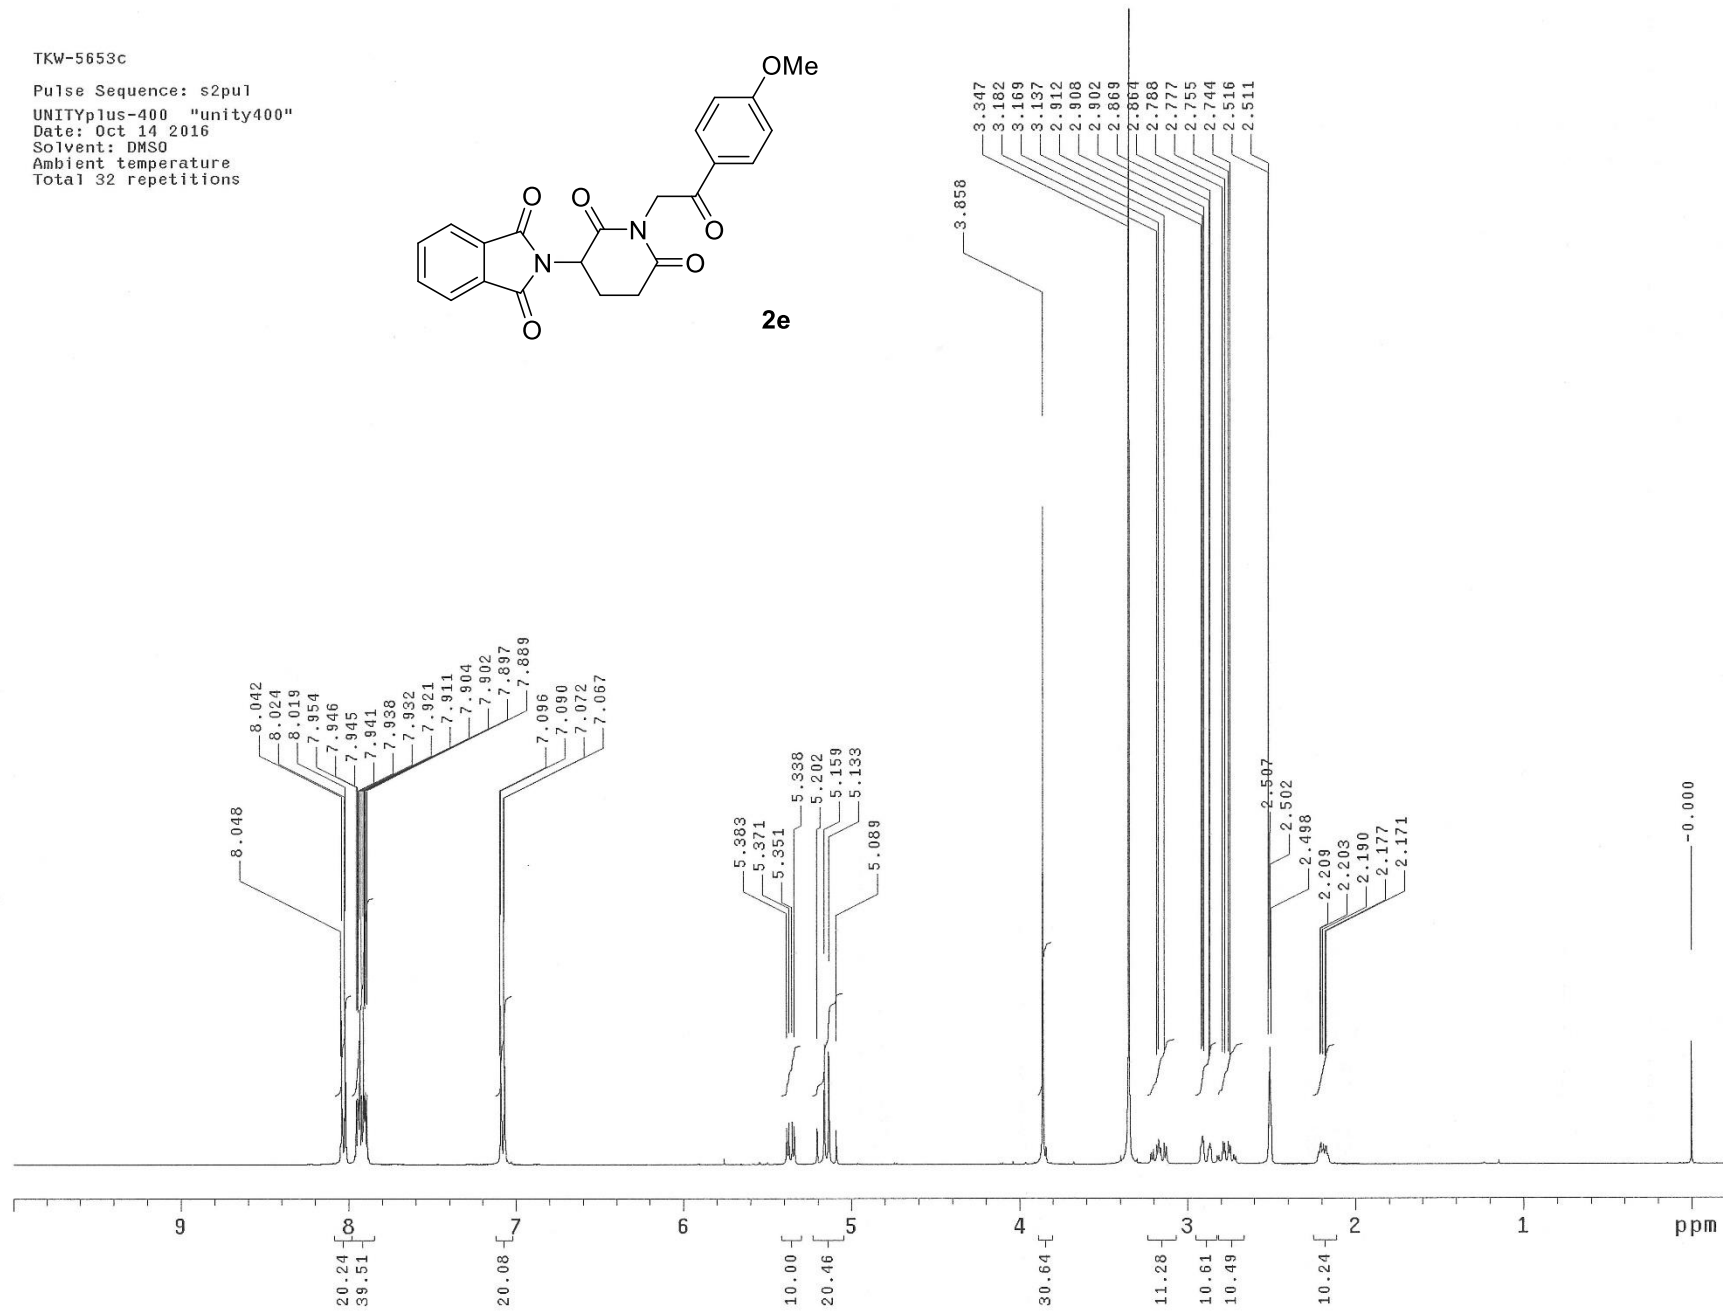

TKW-5653c

Pulse Sequence: s2pu1

UNITYplus-400 "unity400"

Date: Oct 14 2016

Solvent: DMSO

Ambient temperature

Total 2768 repetitions

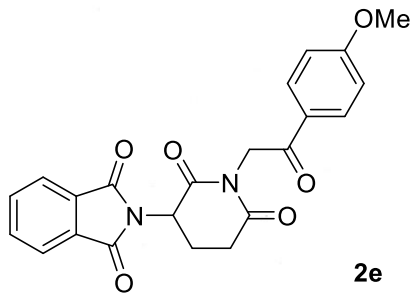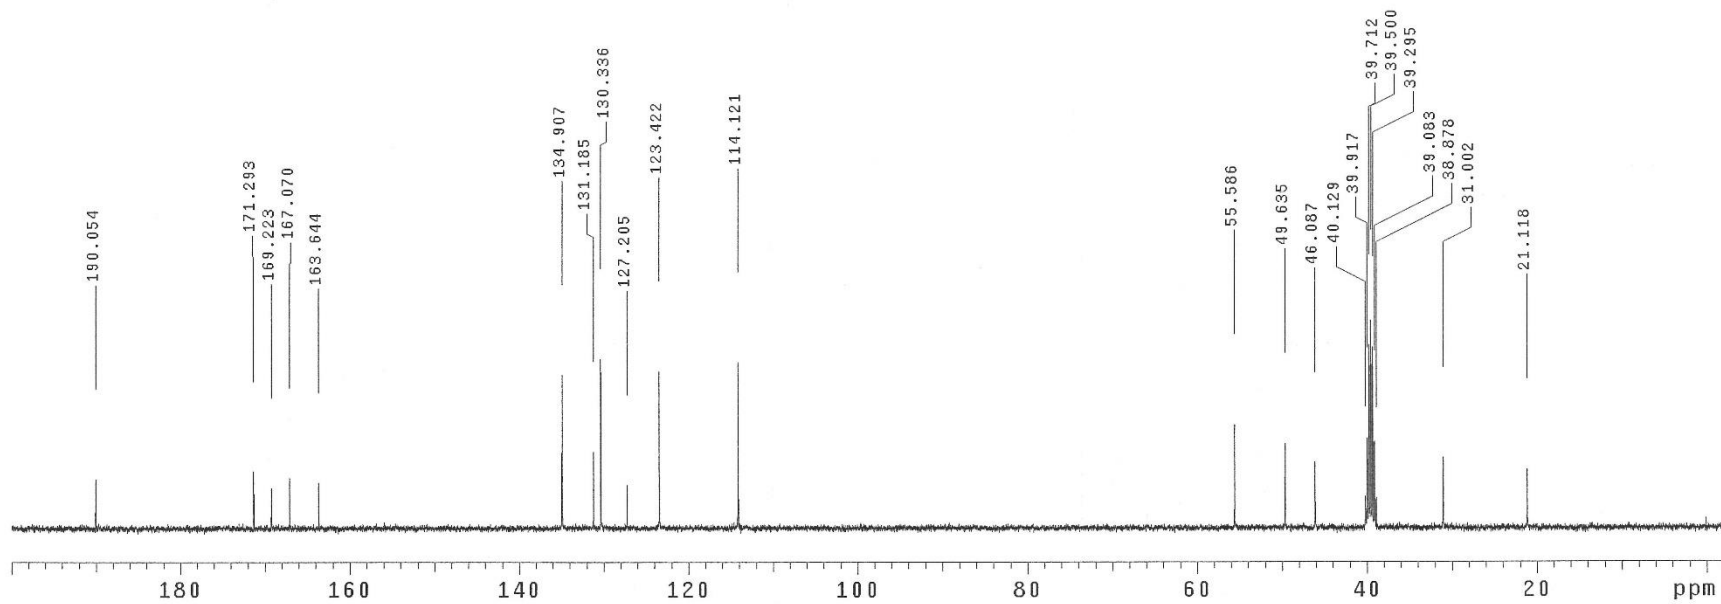

TKW-5917q

Pulse Sequence: s2pu1

UNITYplus-400 "unity400"

Date: Dec 18 2017

Solvent: DMSO

Ambient temperature

Total 64 repetitions

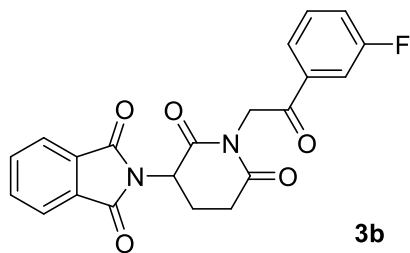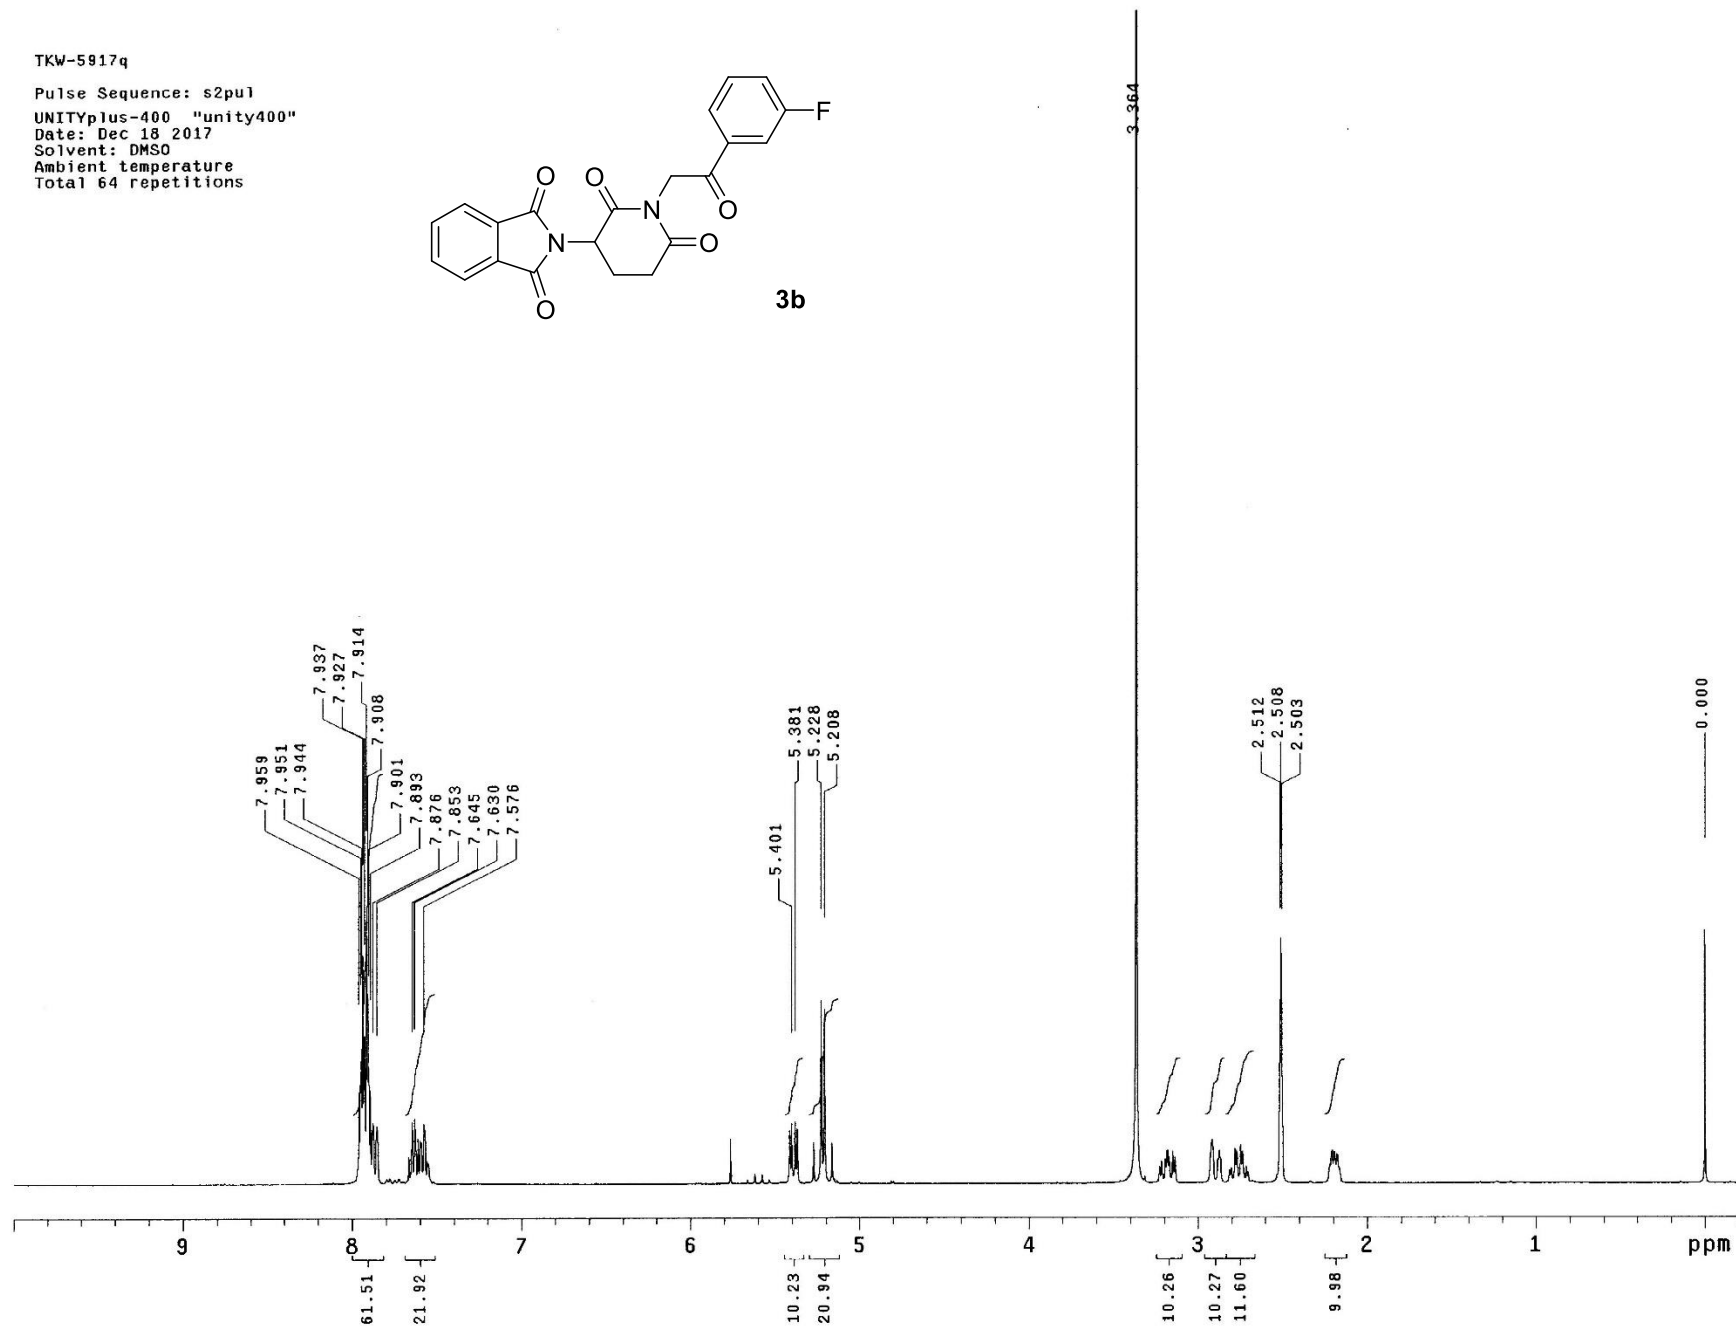

TKW-5917q

Pulse Sequence: s2pu1

UNITYplus-400 "unity400"

Date: Dec 18 2017

Solvent: DMSO

Ambient temperature

Total 5440 repetitions



3b

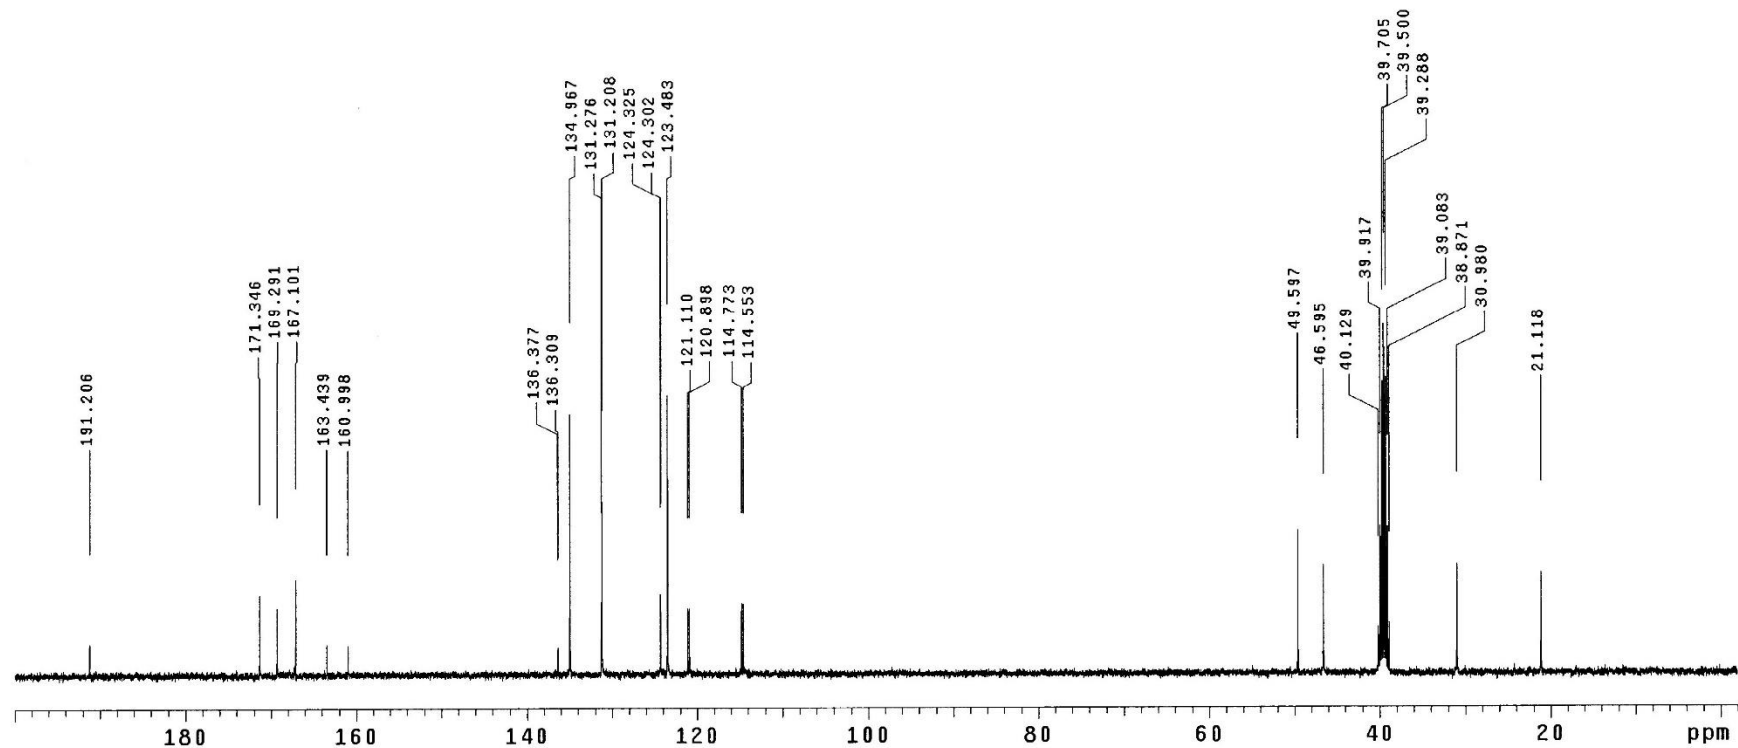

TKW-5694r

Pulse Sequence: s2pu1

UNITYplus-400 "unity400"

Date: Apr 27 2017

Solvent: DMSO

Ambient temperature

Total 80 repetitions

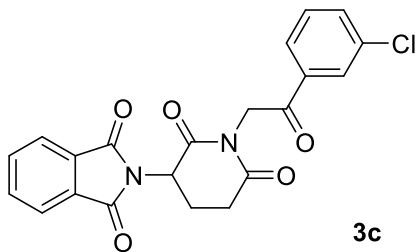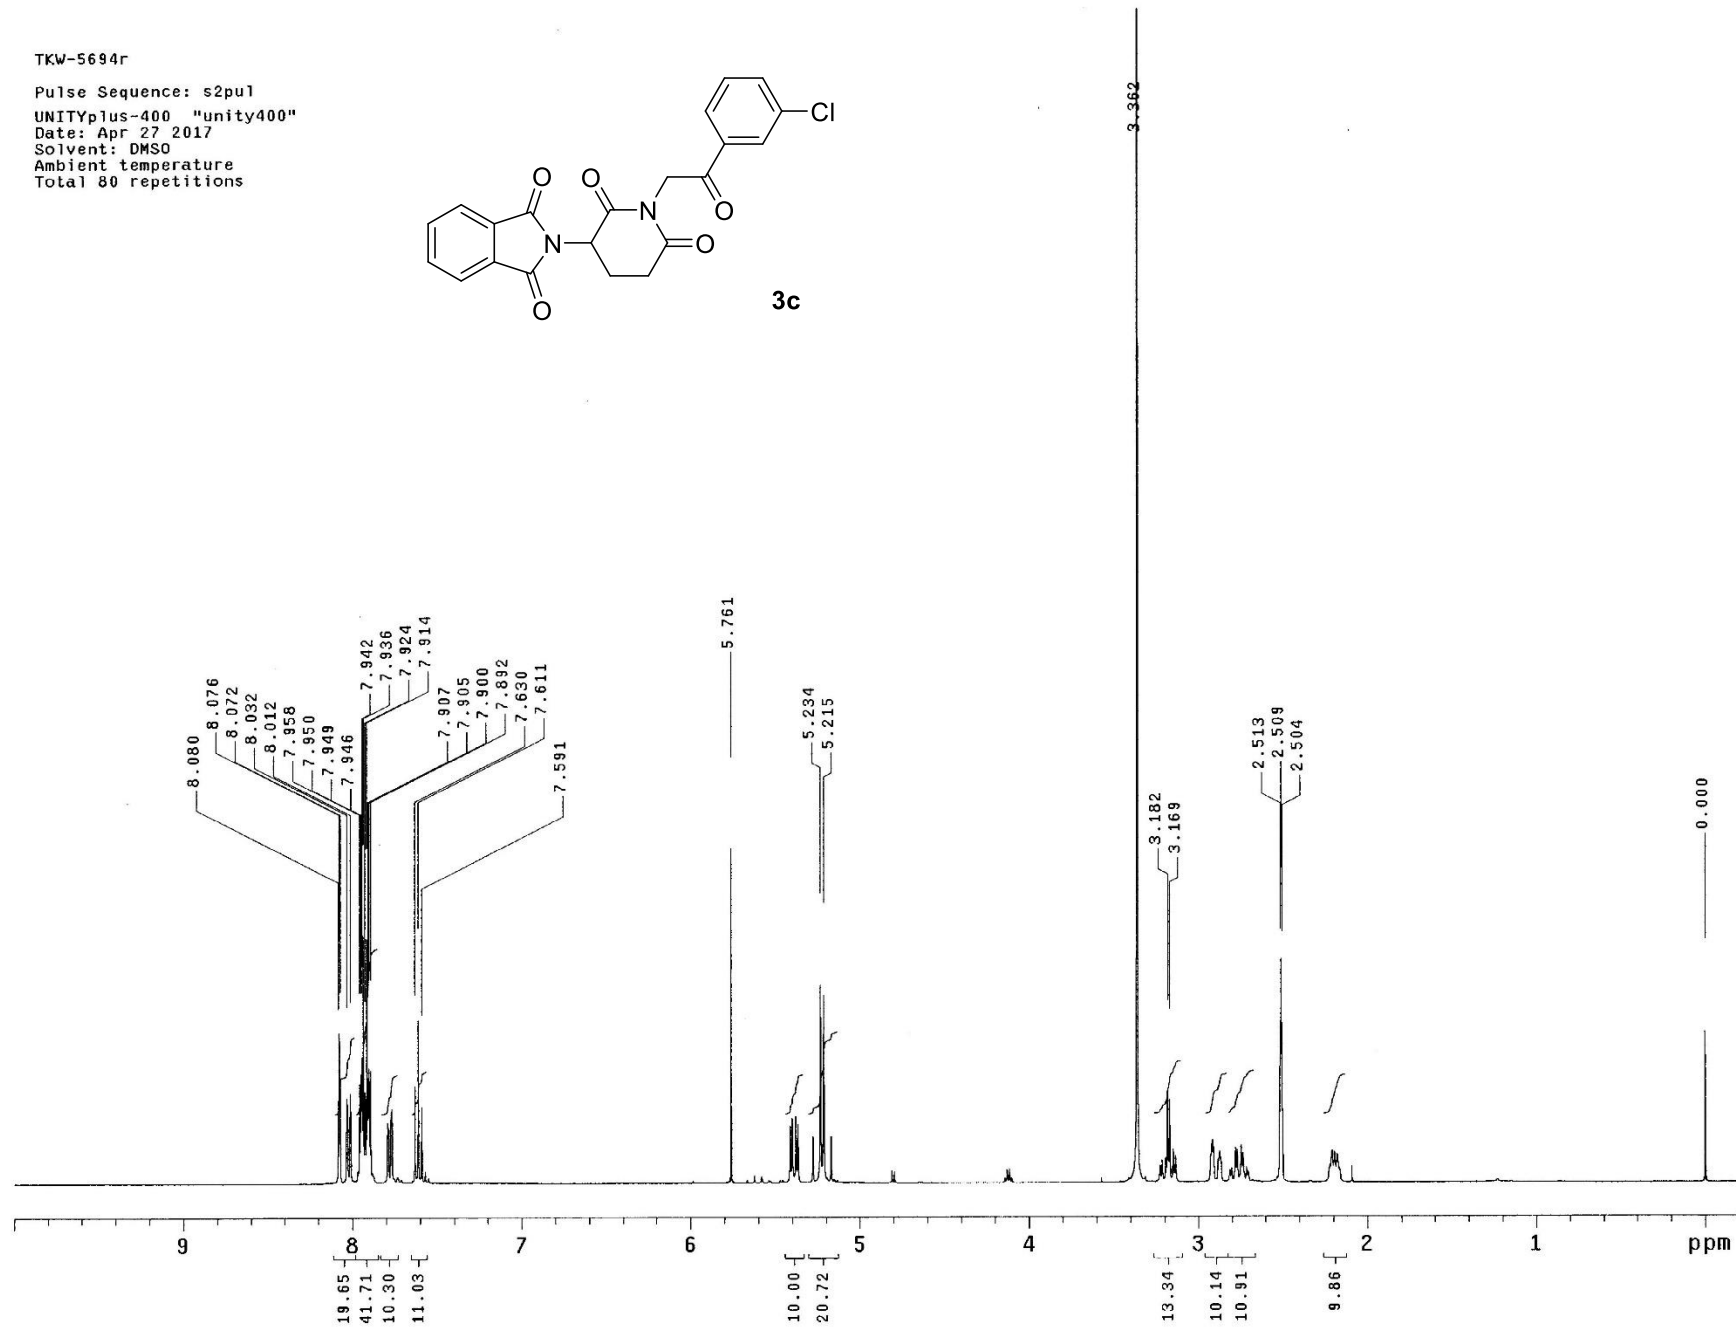

TKW-5694r

Pulse Sequence: s2pu1

UNITYplus-400 "unity400"

Date: Apr 27 2017

Solvent: DMSO

Ambient temperature

Total 16000 repetitions

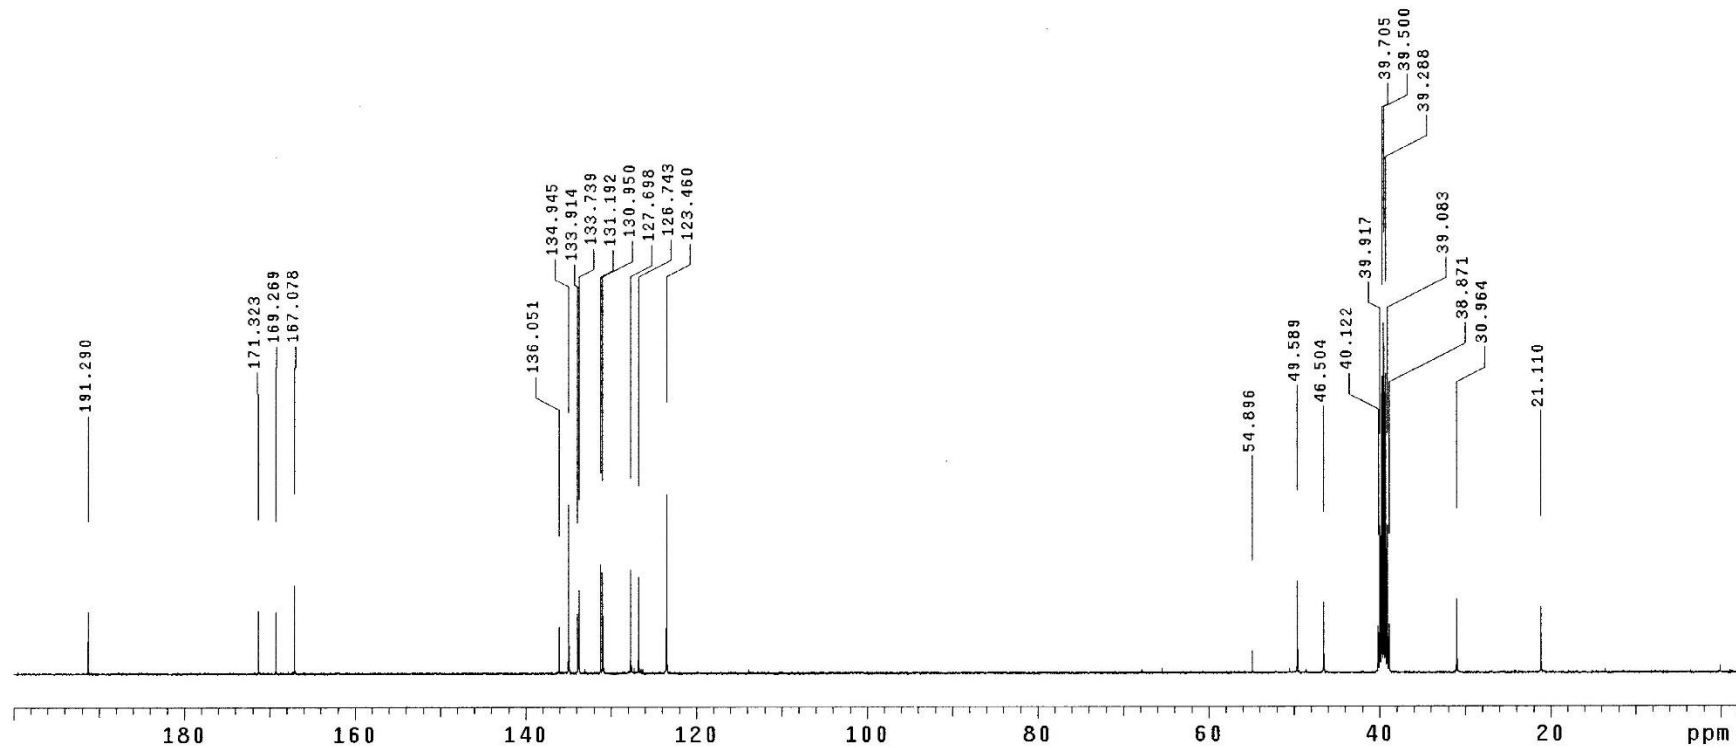

TKW-5660j

Pulse Sequence: s2pu1

UNITYplus-400 "unity400"

Date: Jun 2 2016

Solvent: DMSO

Ambient temperature

Total 32 repetitions

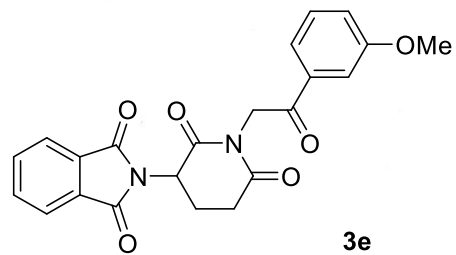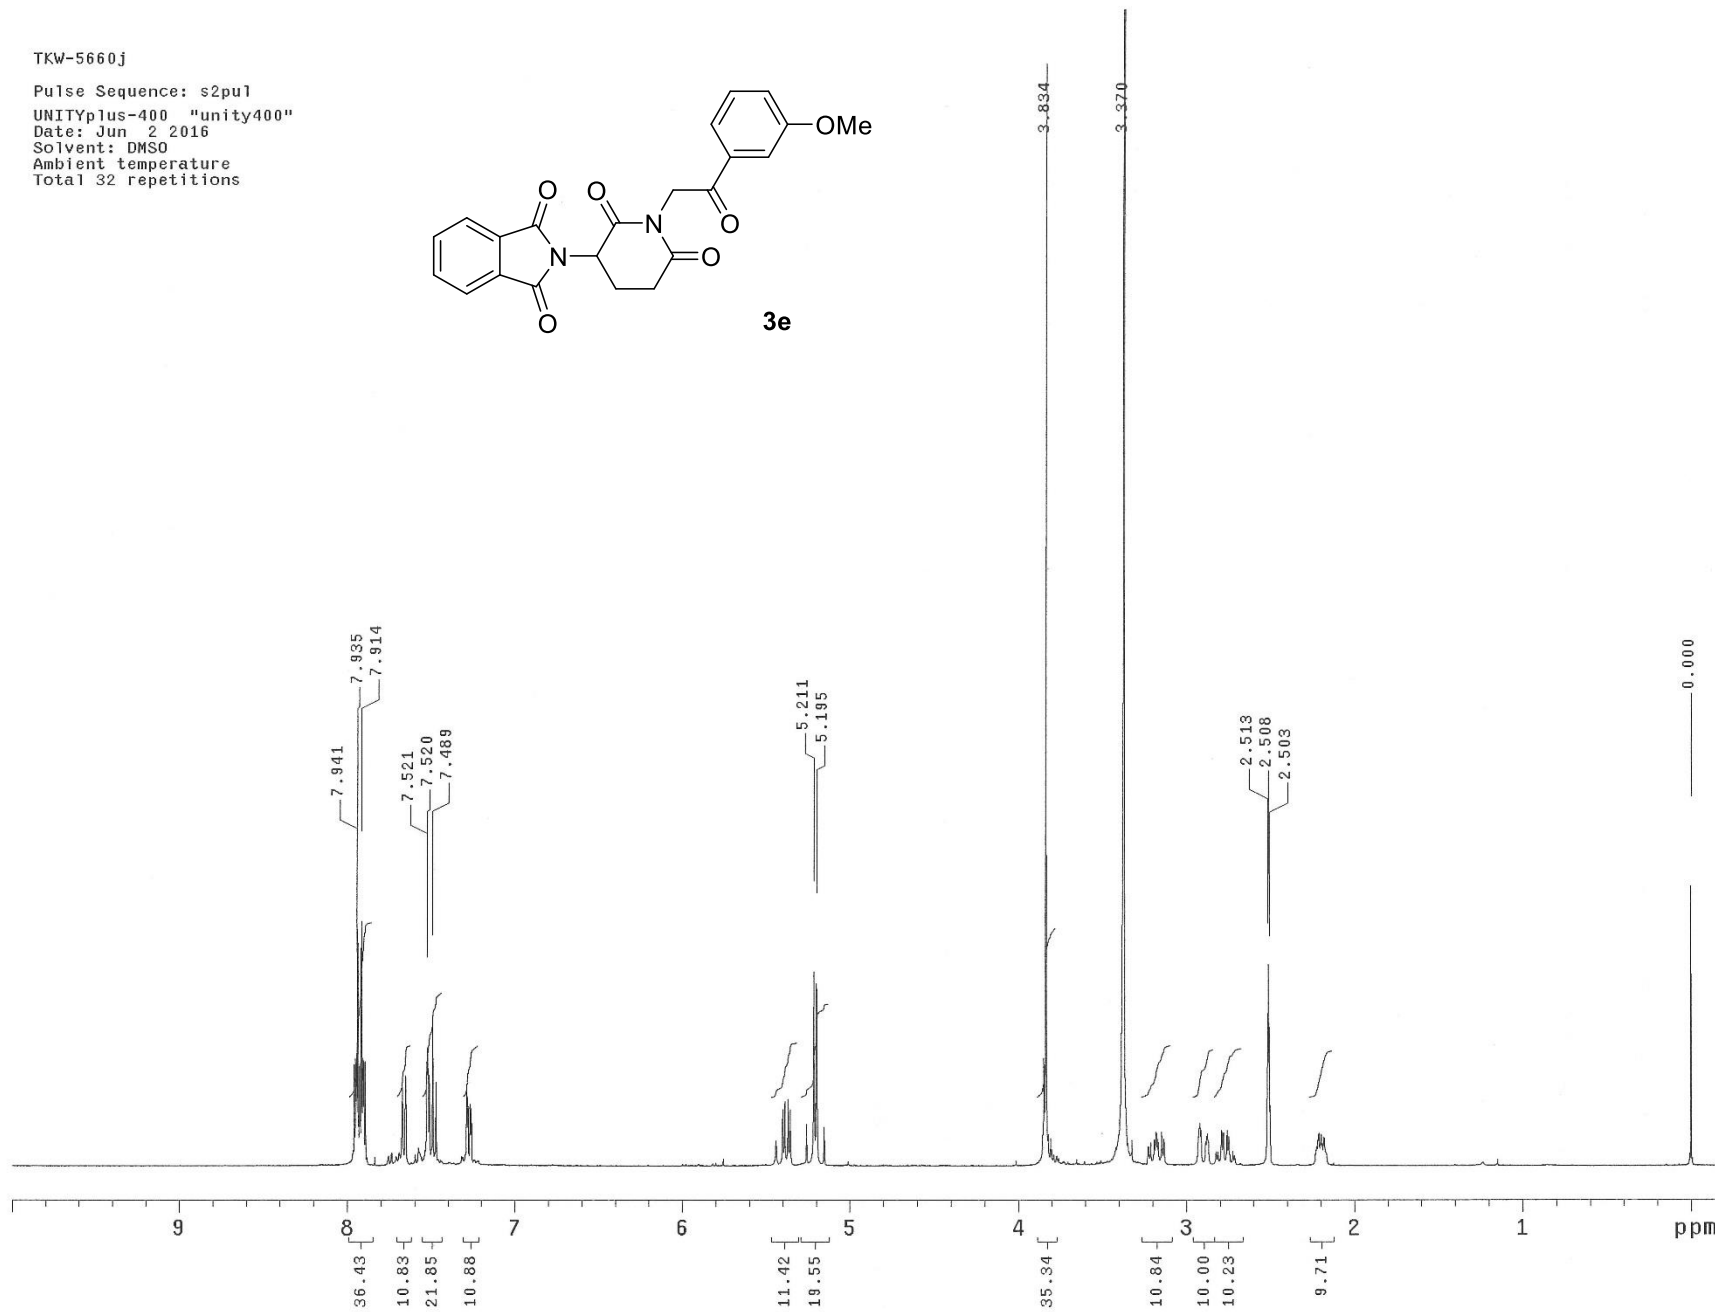

TKW-5660j

Pulse Sequence: s2pu1

UNITYplus-400 "unity400"

Date: Jun 2 2016

Solvent: DMSO

Ambient temperature

Total 2224 repetitions

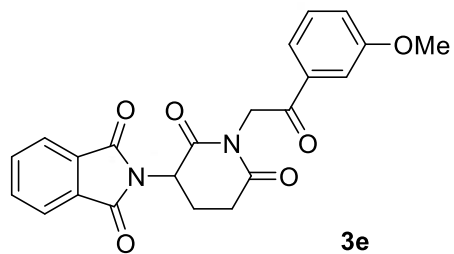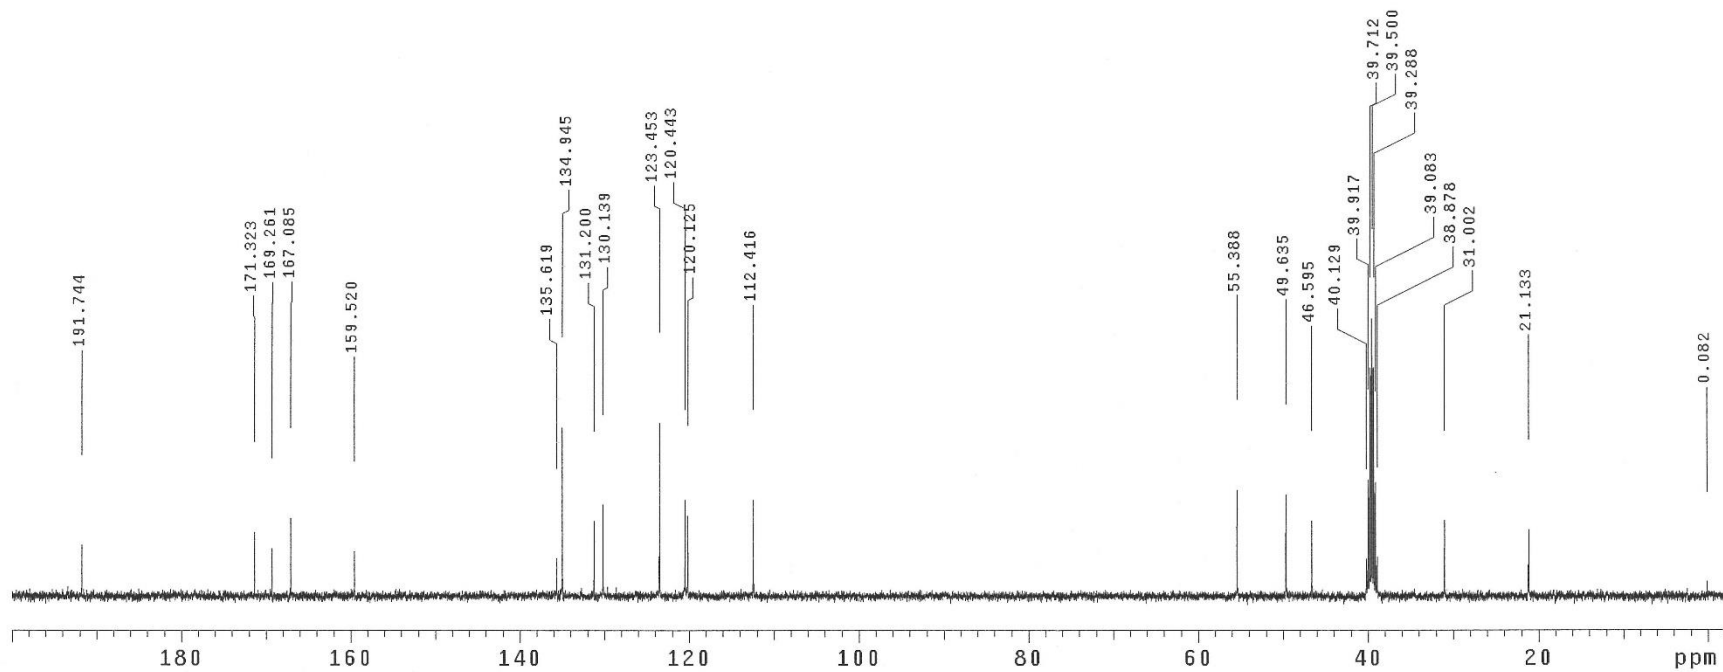



TKW-5656f

Pulse Sequence: s2pu1

UNITYplus-400 "unity400"

Date: Oct 17 2016

Solvent: DMSO

Ambient temperature

Total 32 repetitions

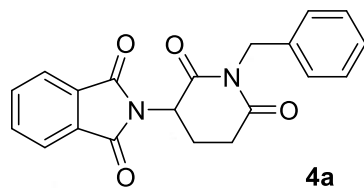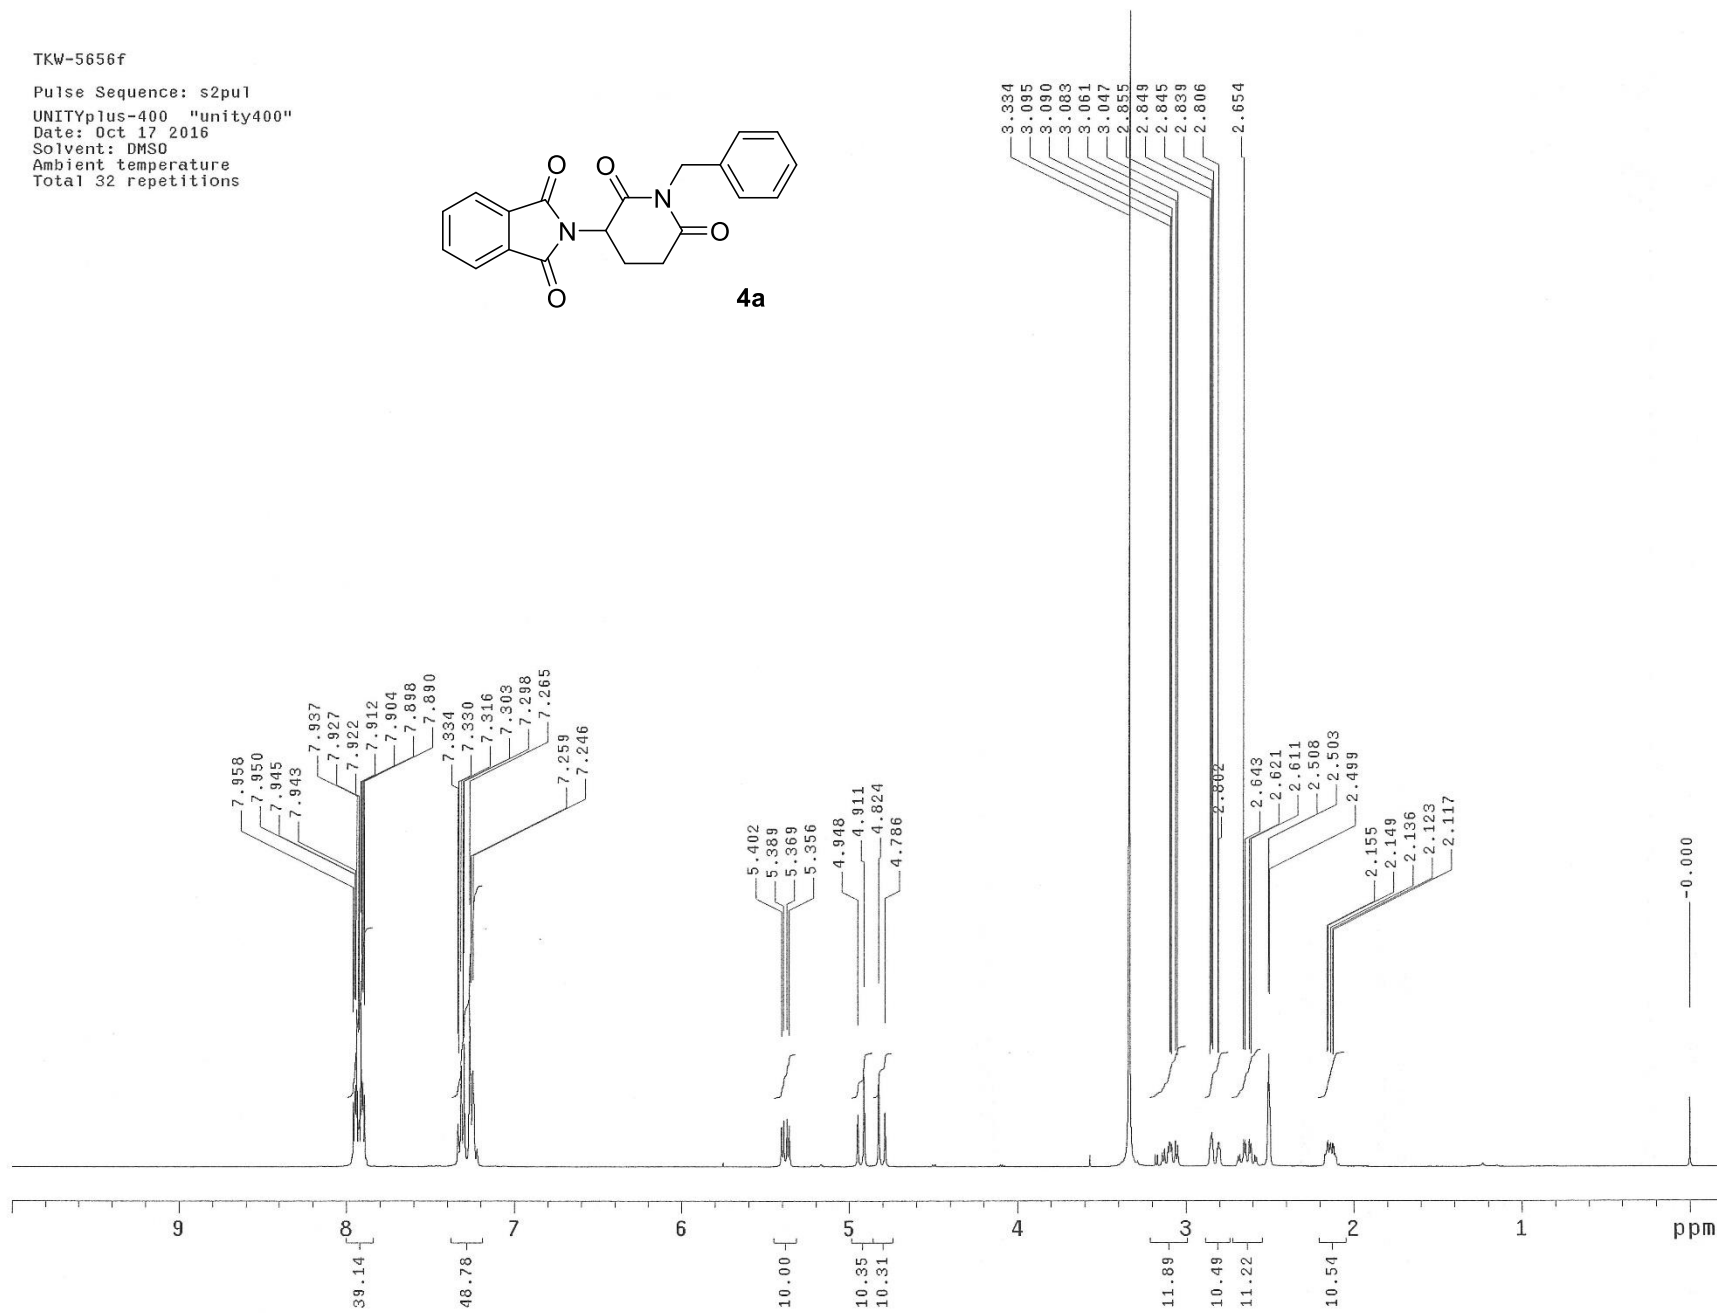

TKW-5656f

Pulse Sequence: s2pu1

UNITYplus-400 "unity400"

Date: Oct 17 2016

Solvent: DMSO

Ambient temperature

Total 2576 repetitions

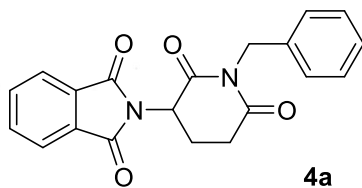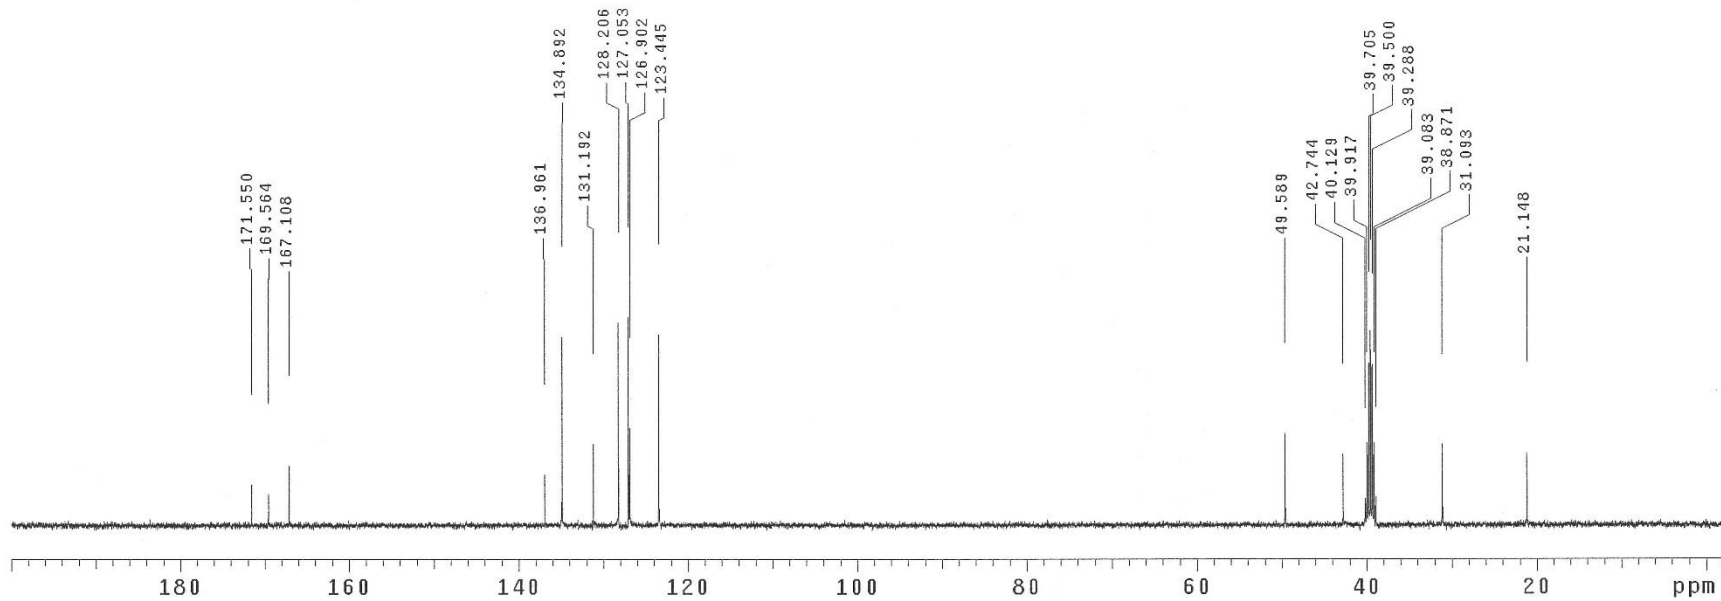

TKW-5658h

Pulse Sequence: s2pu1

UNITYplus-400 "unity400"

Date: Jun 2 2016

Solvent: DMSO

Ambient temperature

Total 64 repetitions

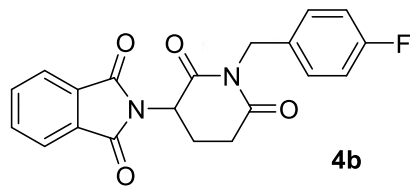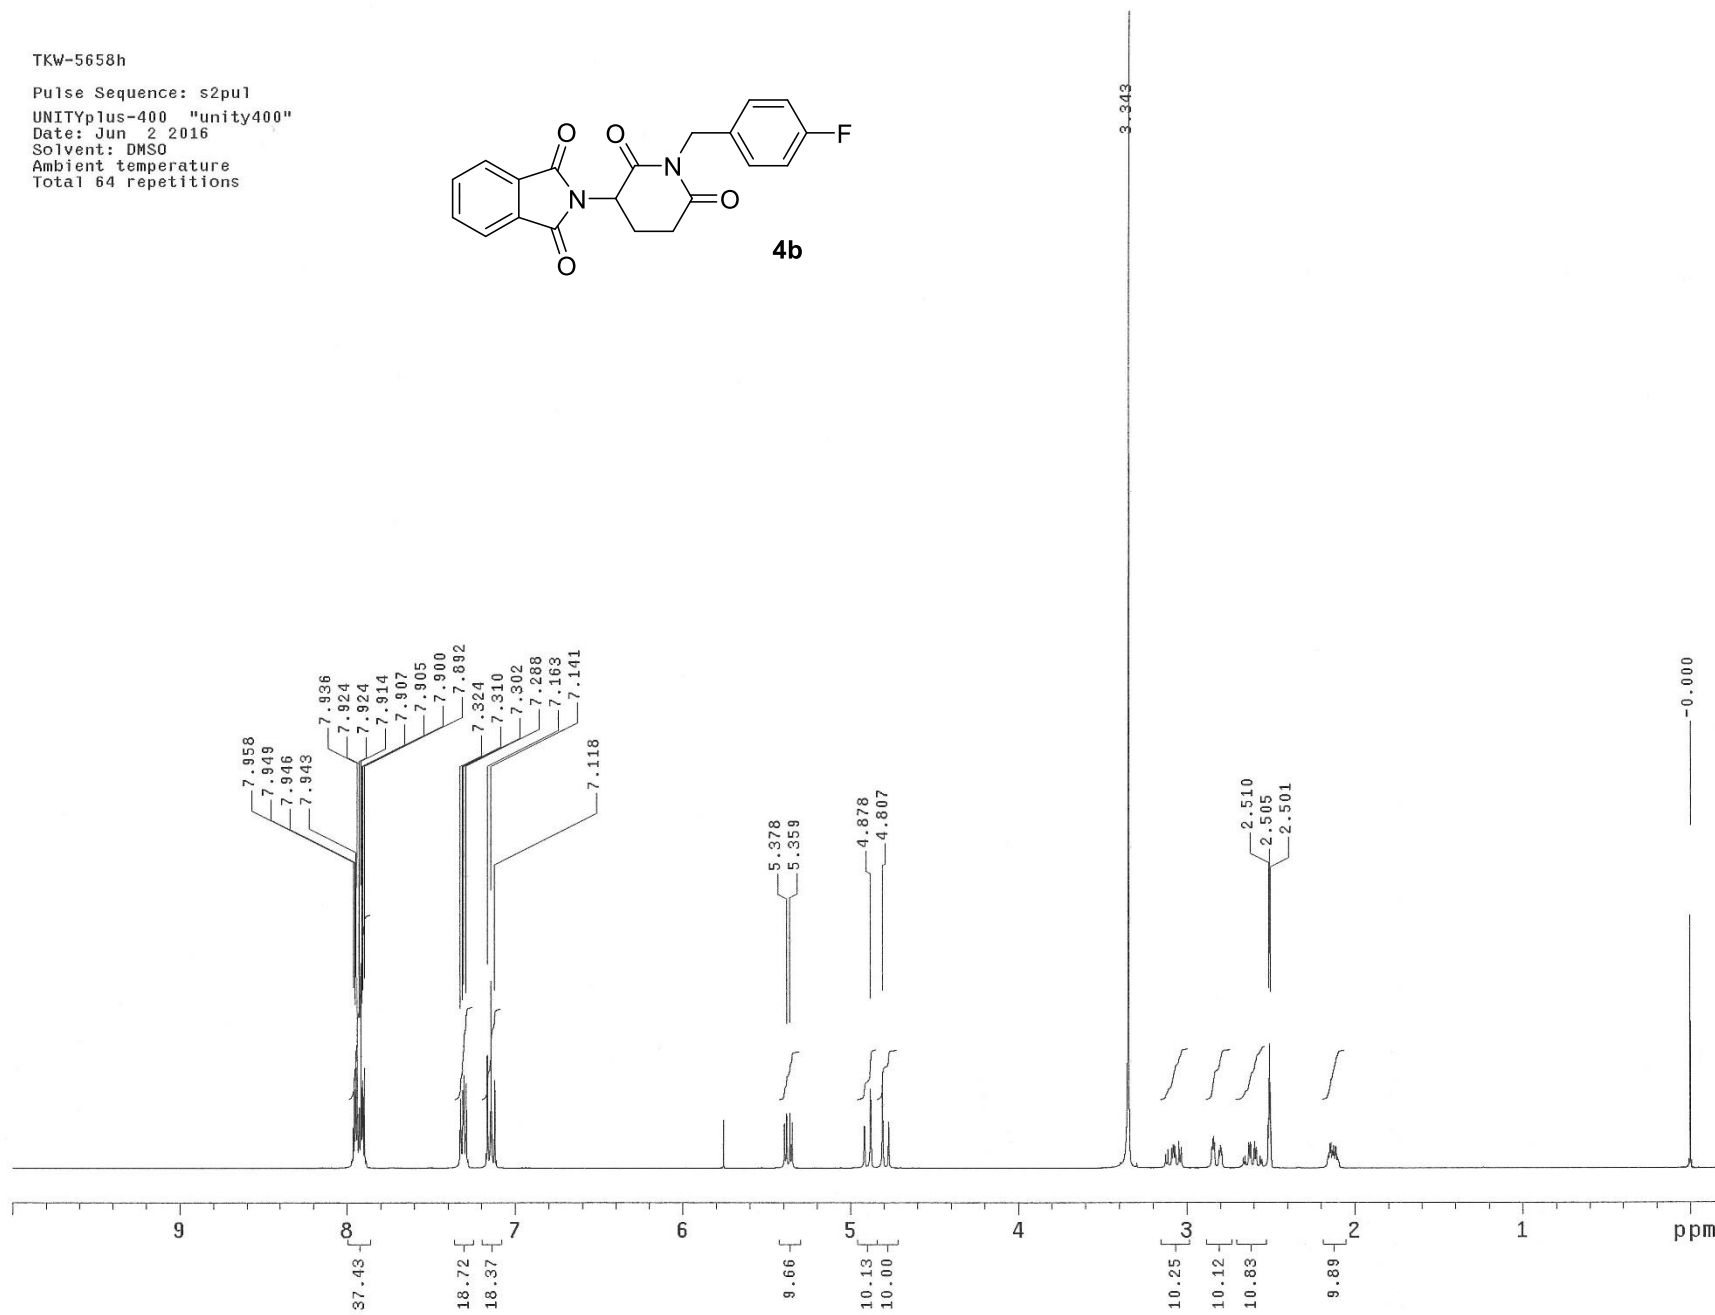

TKW-5658h

Pulse Sequence: s2pu1

UNITYplus-400 "unity400"

Date: Jun 2 2016

Solvent: DMSO

Ambient temperature

Total 4144 repetitions

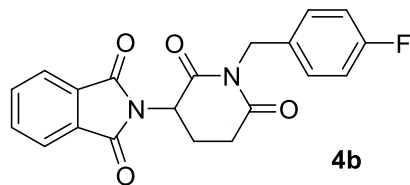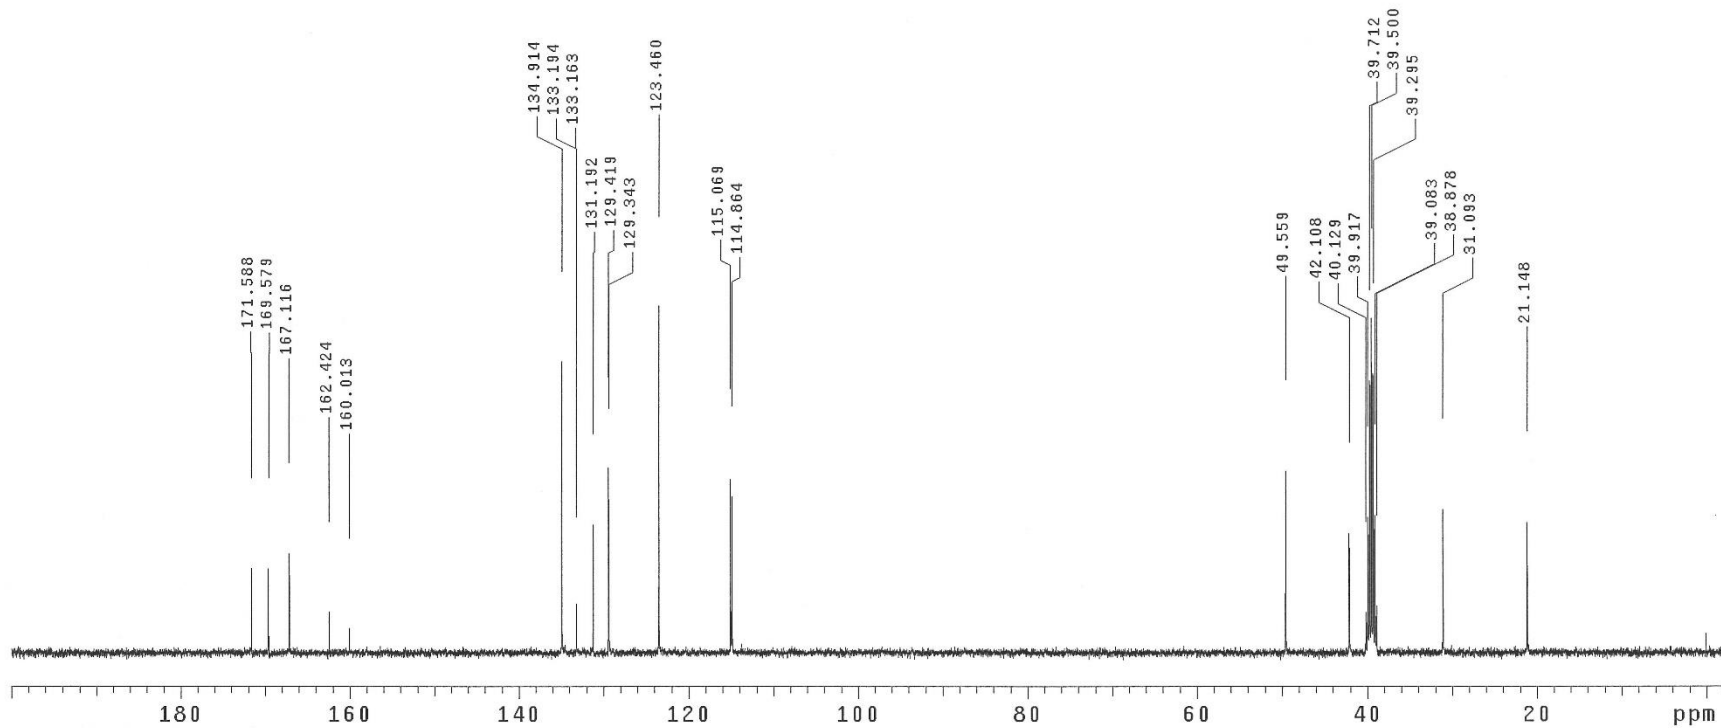

TKW-5681e

Pulse Sequence: s2pu1

UNITYplus-400 "unity400"

Date: Oct 24 2016

Solvent: DMSO

Ambient temperature

Total 32 repetitions

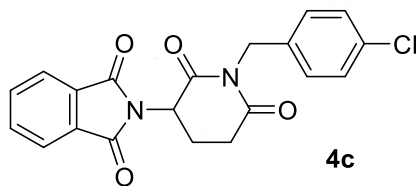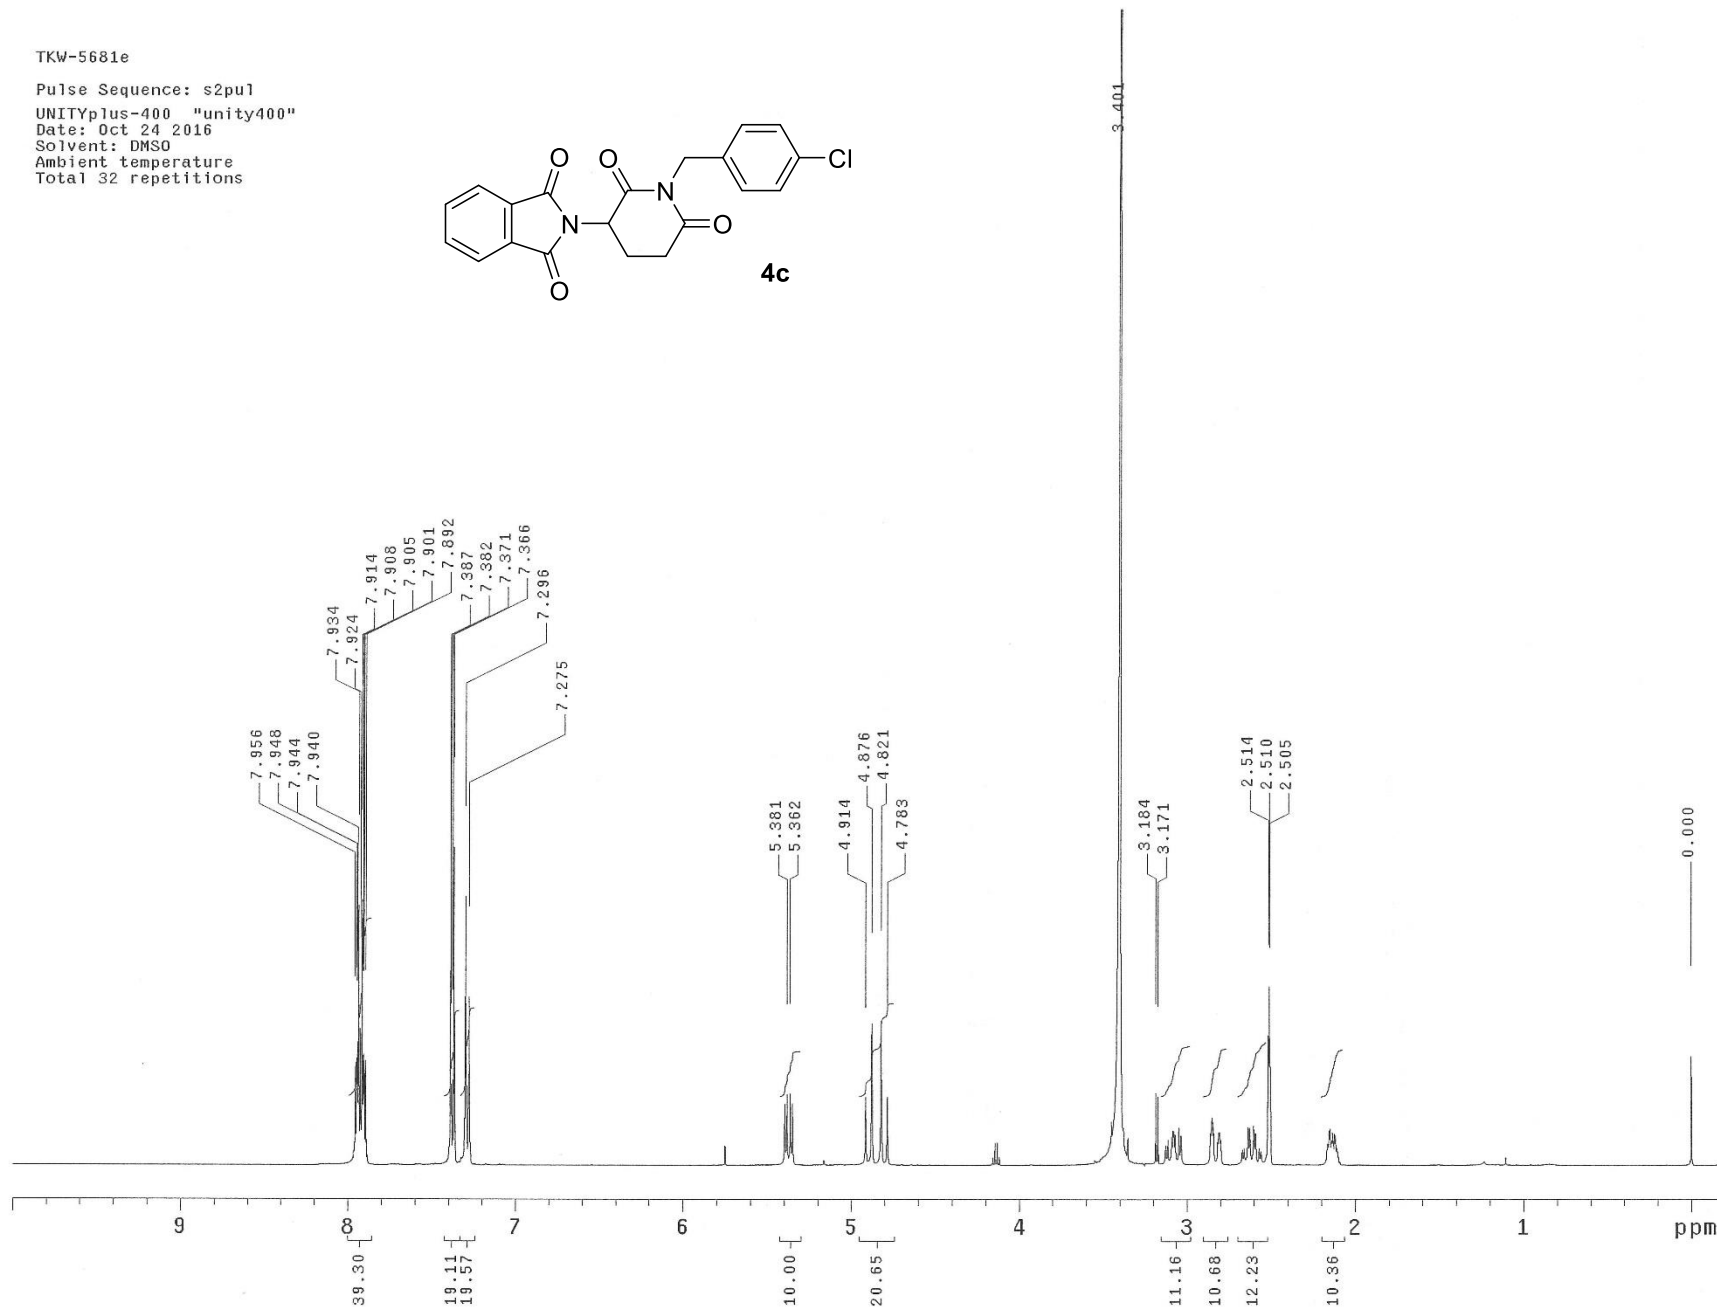

TKW-5681e

Pulse Sequence: s2pu1

UNITYplus-400 "unity400"

Date: Oct 24 2016

Solvent: DMSO

Ambient temperature

Total 2512 repetitions

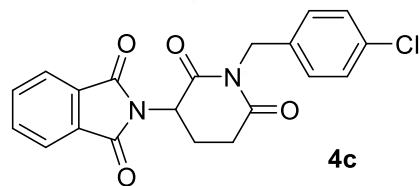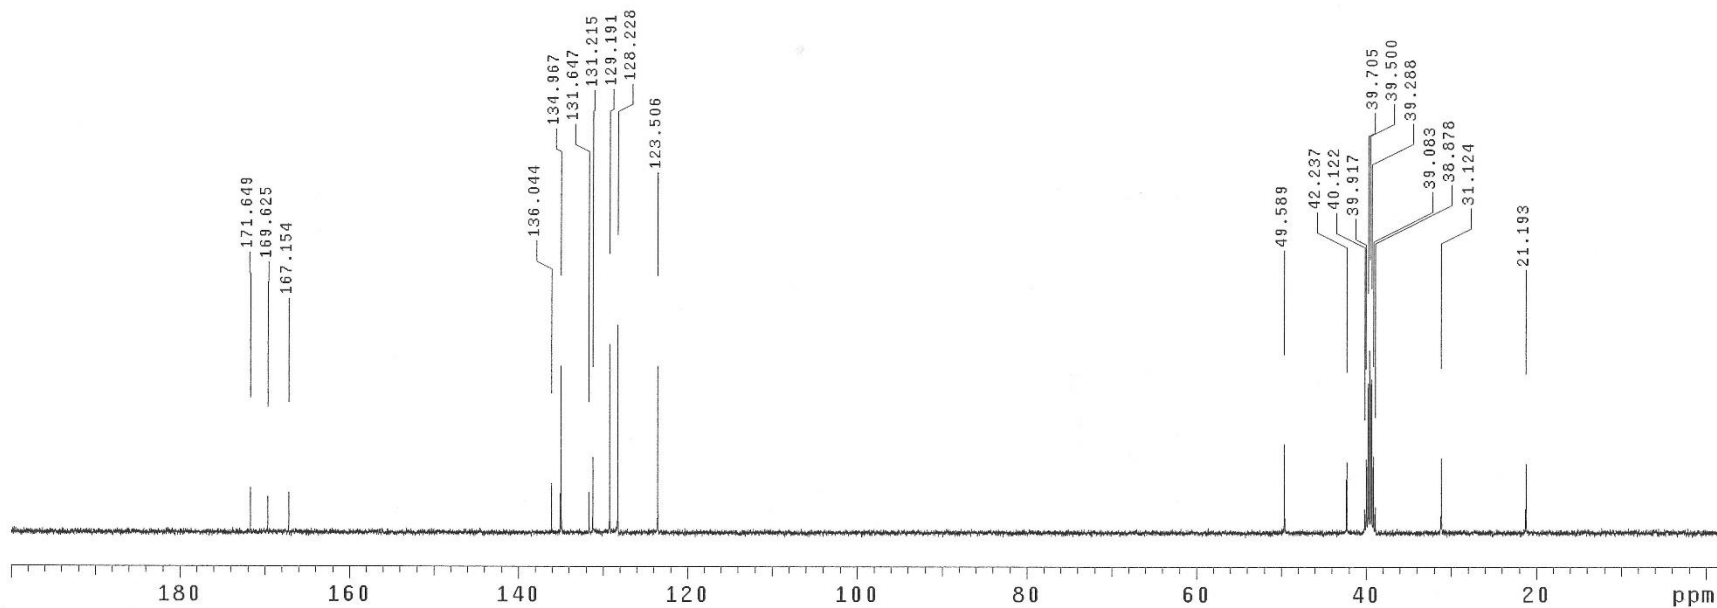

TKW-5915o

Pulse Sequence: s2pu1  
Mercury-400BB "MerPlus400"  
Date: Dec 6 2017  
Solvent: dms0  
Ambient temperature  
Total 64 repetitions

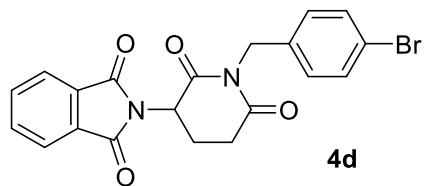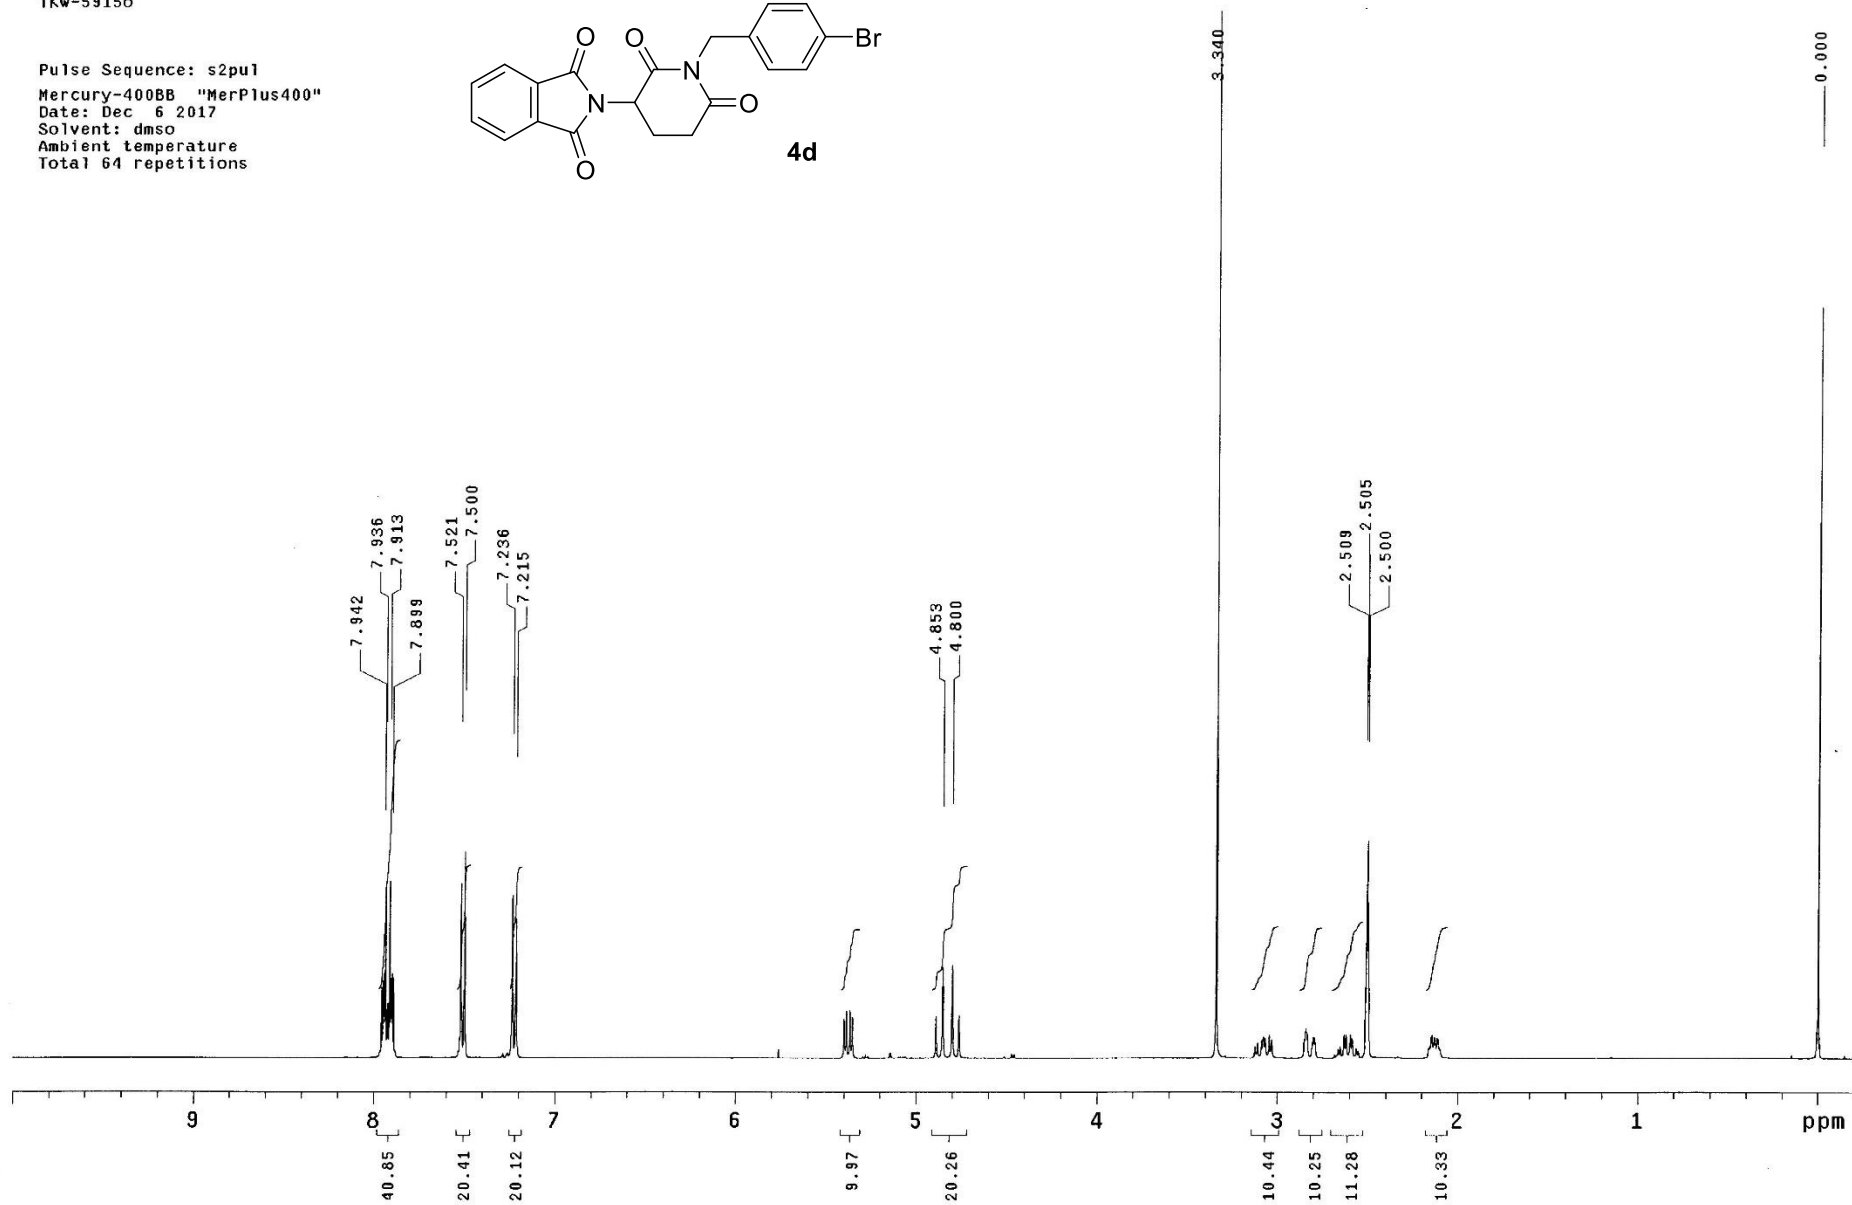

TKW-5915o

Pulse Sequence: s2pu1  
Mercury-400BB "MerPlus400"  
Date: Dec 6 2017  
Solvent: dmsd  
Ambient temperature  
Total 3824 repetitions

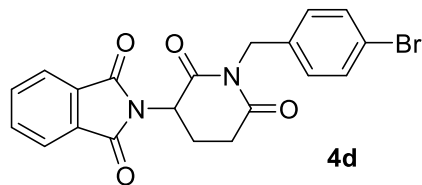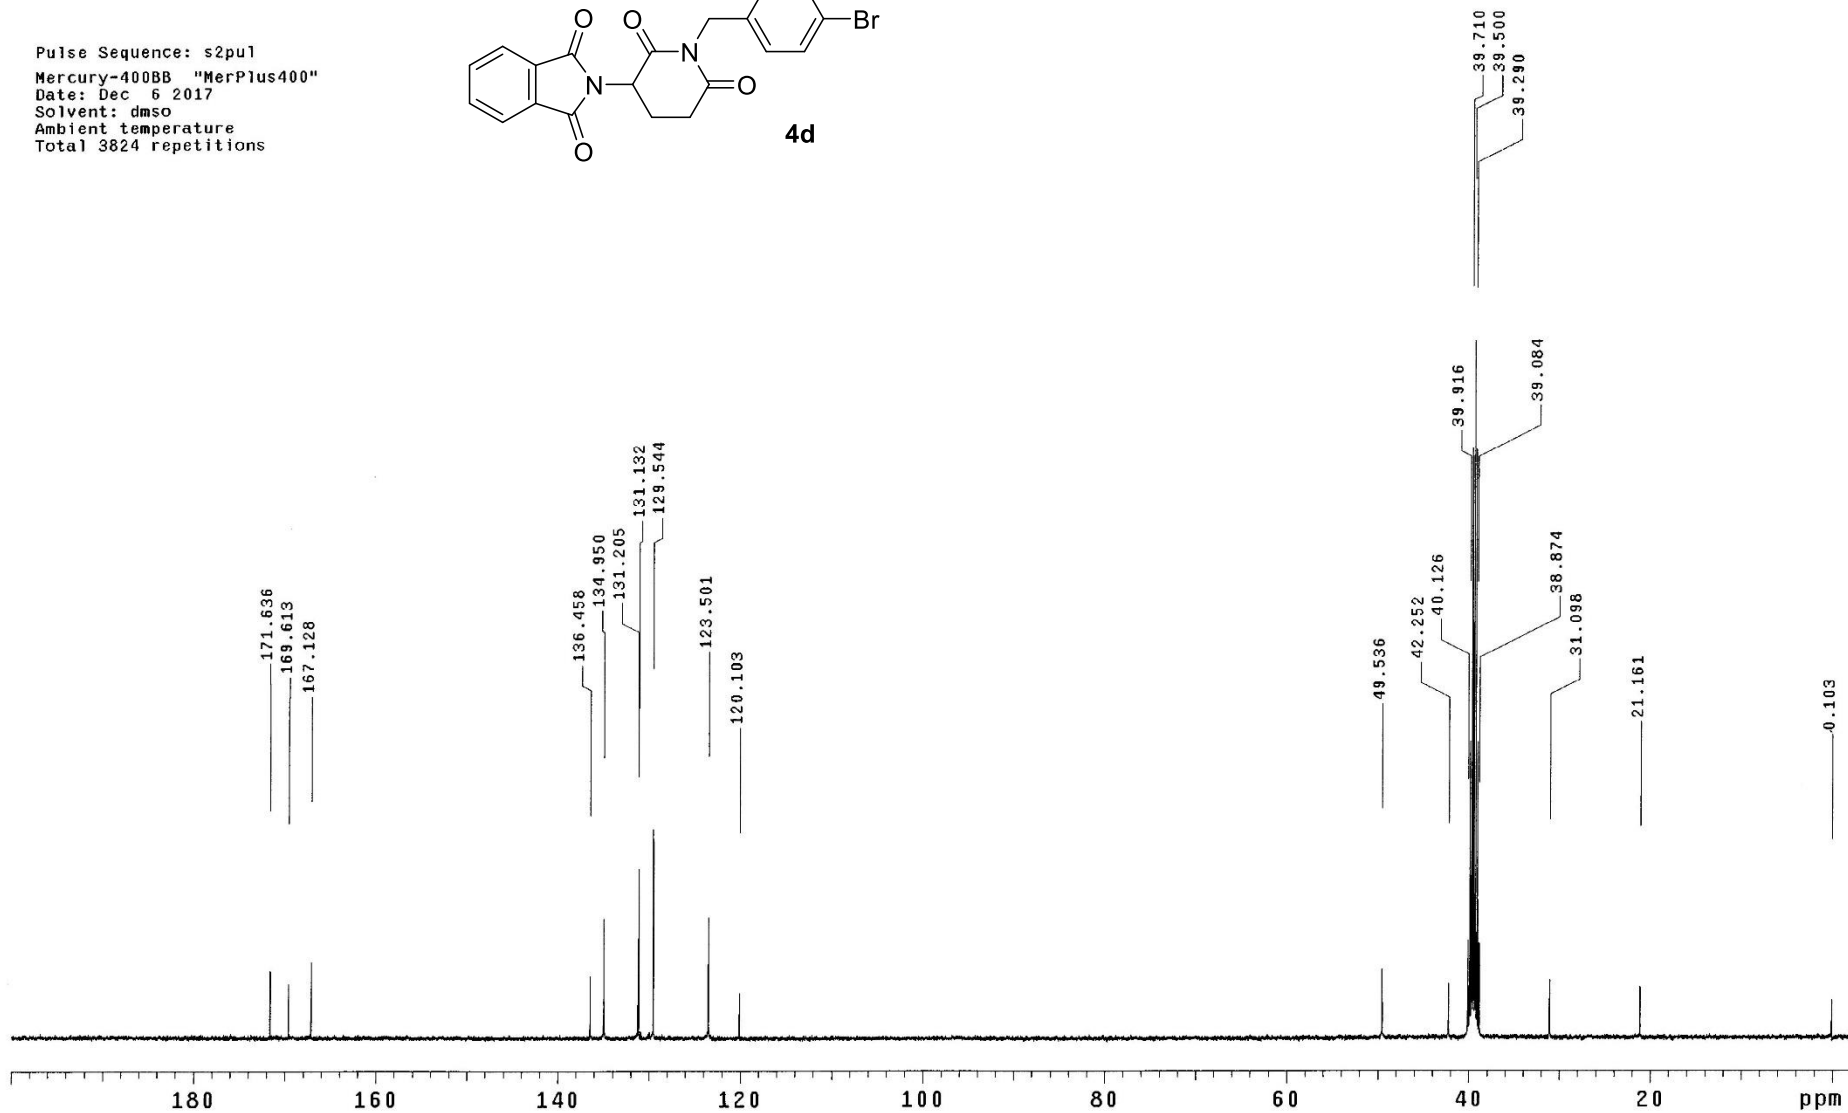



TKW-5659i

Pulse Sequence: s2pu1

UNITYplus-400 "unity400"

Date: Aug 17 2016

Solvent: DMSO

Ambient temperature

Total 64 repetitions

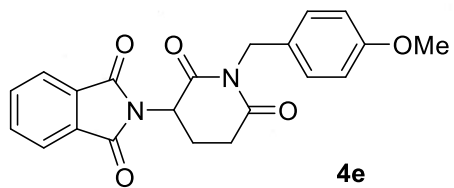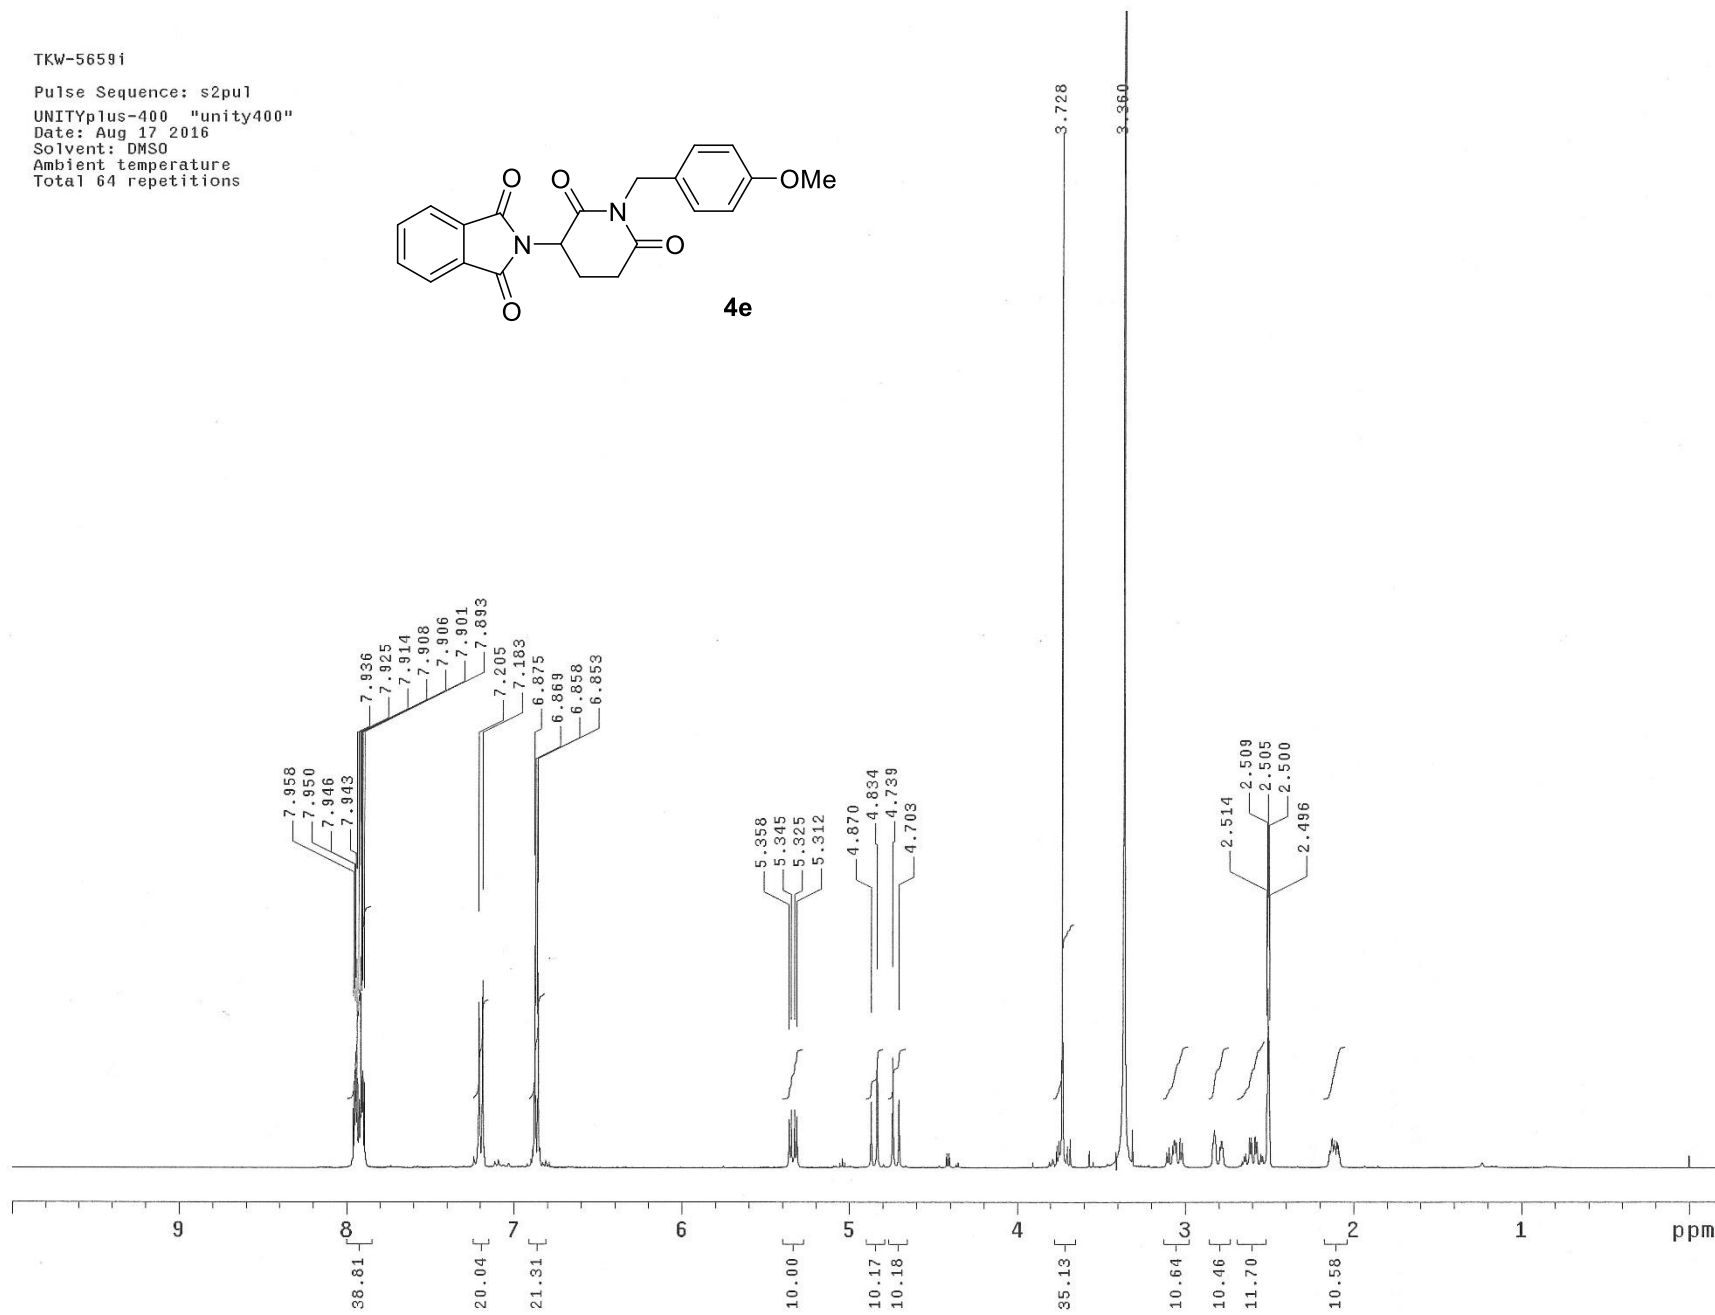

TKW-56591

Pulse Sequence: s2pu1

UNITYplus-400 "unity400"

Date: Aug 17 2016

Solvent: DMSO

Ambient temperature

Total 3200 repetitions

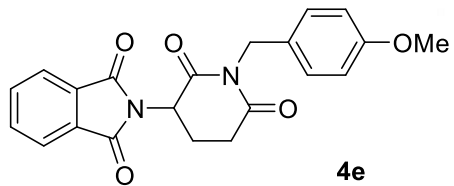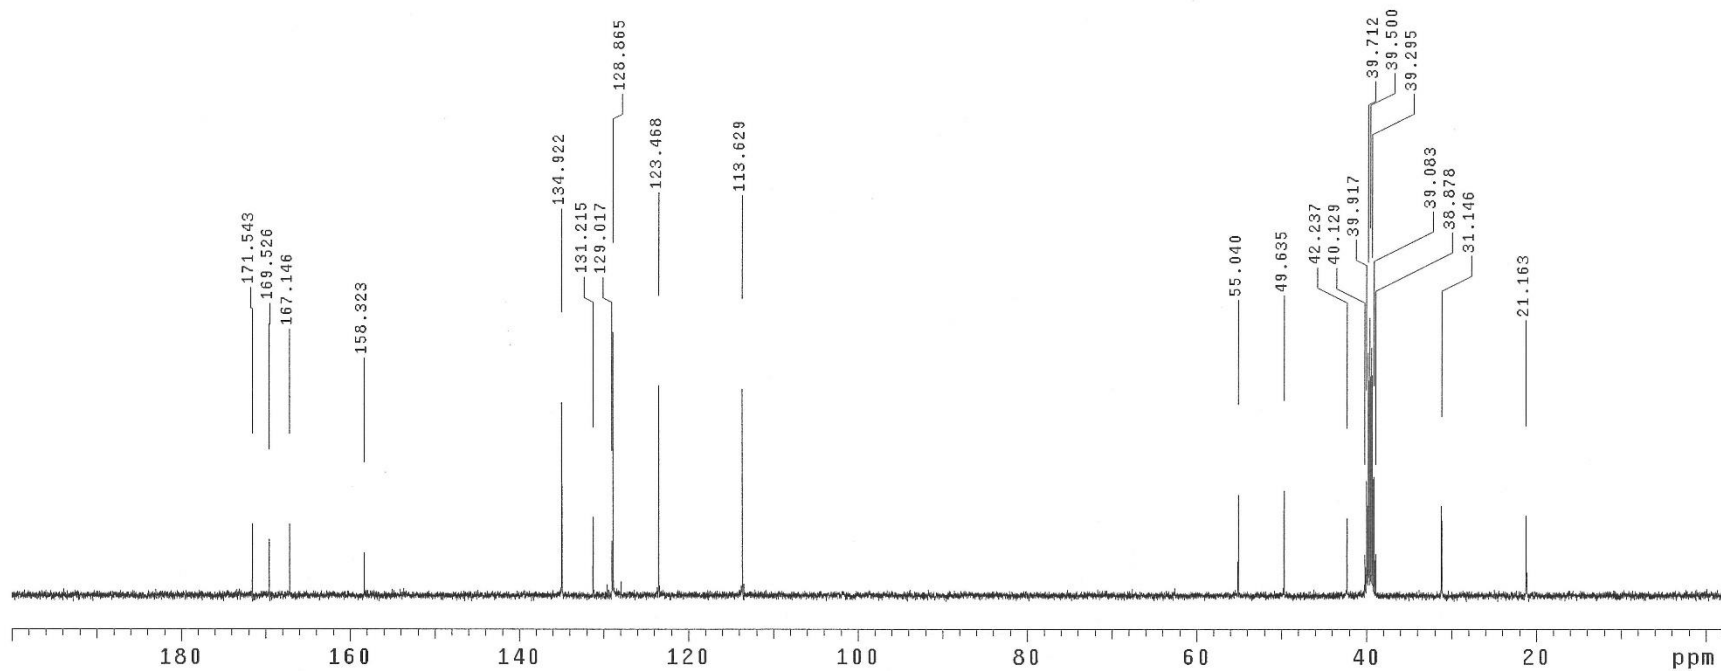

TKW-56621

Pulse Sequence: s2pu1

UNITYplus-400 "unity400"

Date: Jun 2 2016

Solvent: DMSO

Ambient temperature

Total 64 repetitions

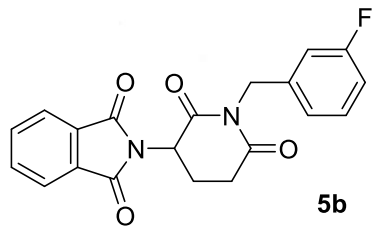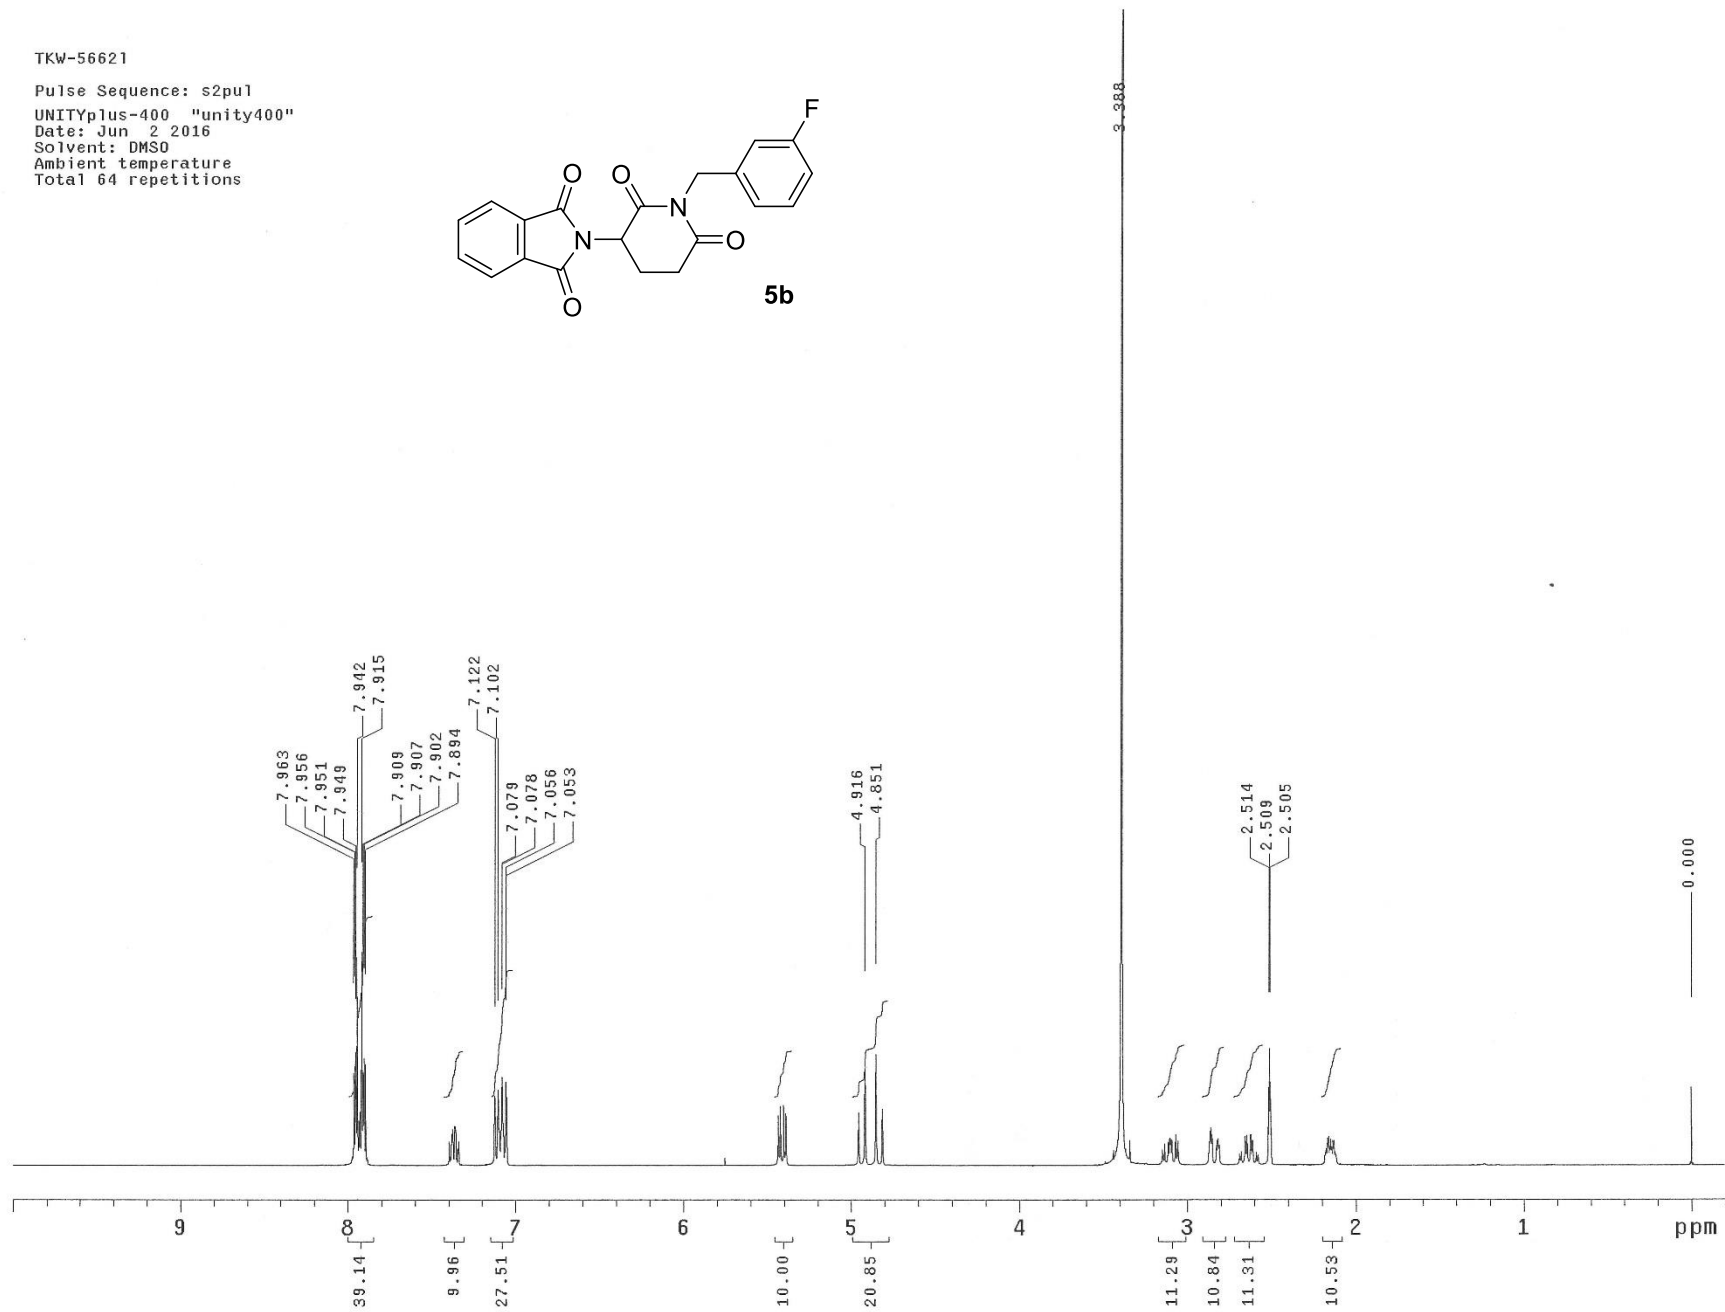

TKW-56621

Pulse Sequence: s2pu1

UNITYplus-400 "unity400"

Date: Jun 2 2016

Solvent: DMSO

Ambient temperature

Total 2016 repetitions

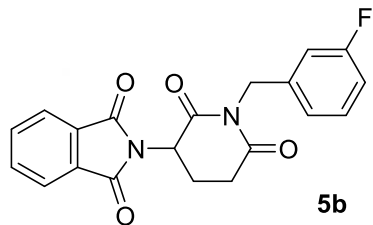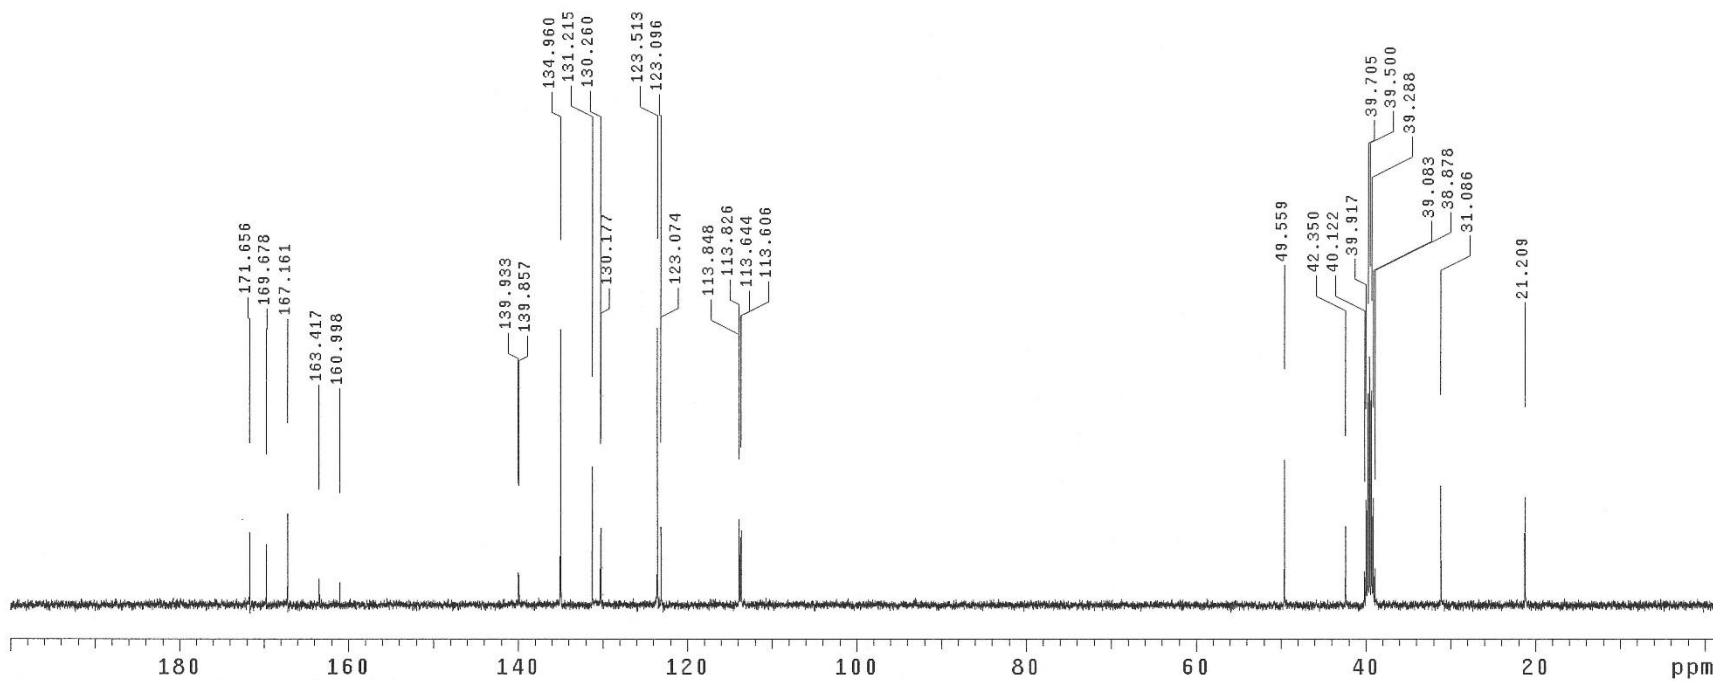

TKW-5664n

Pulse Sequence: s2pu1

UNITYplus-400 "unity400"

Date: Jun 3 2016

Solvent: DMSO

Ambient temperature

Total 64 repetitions

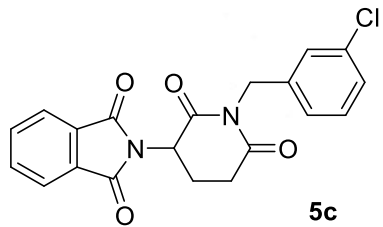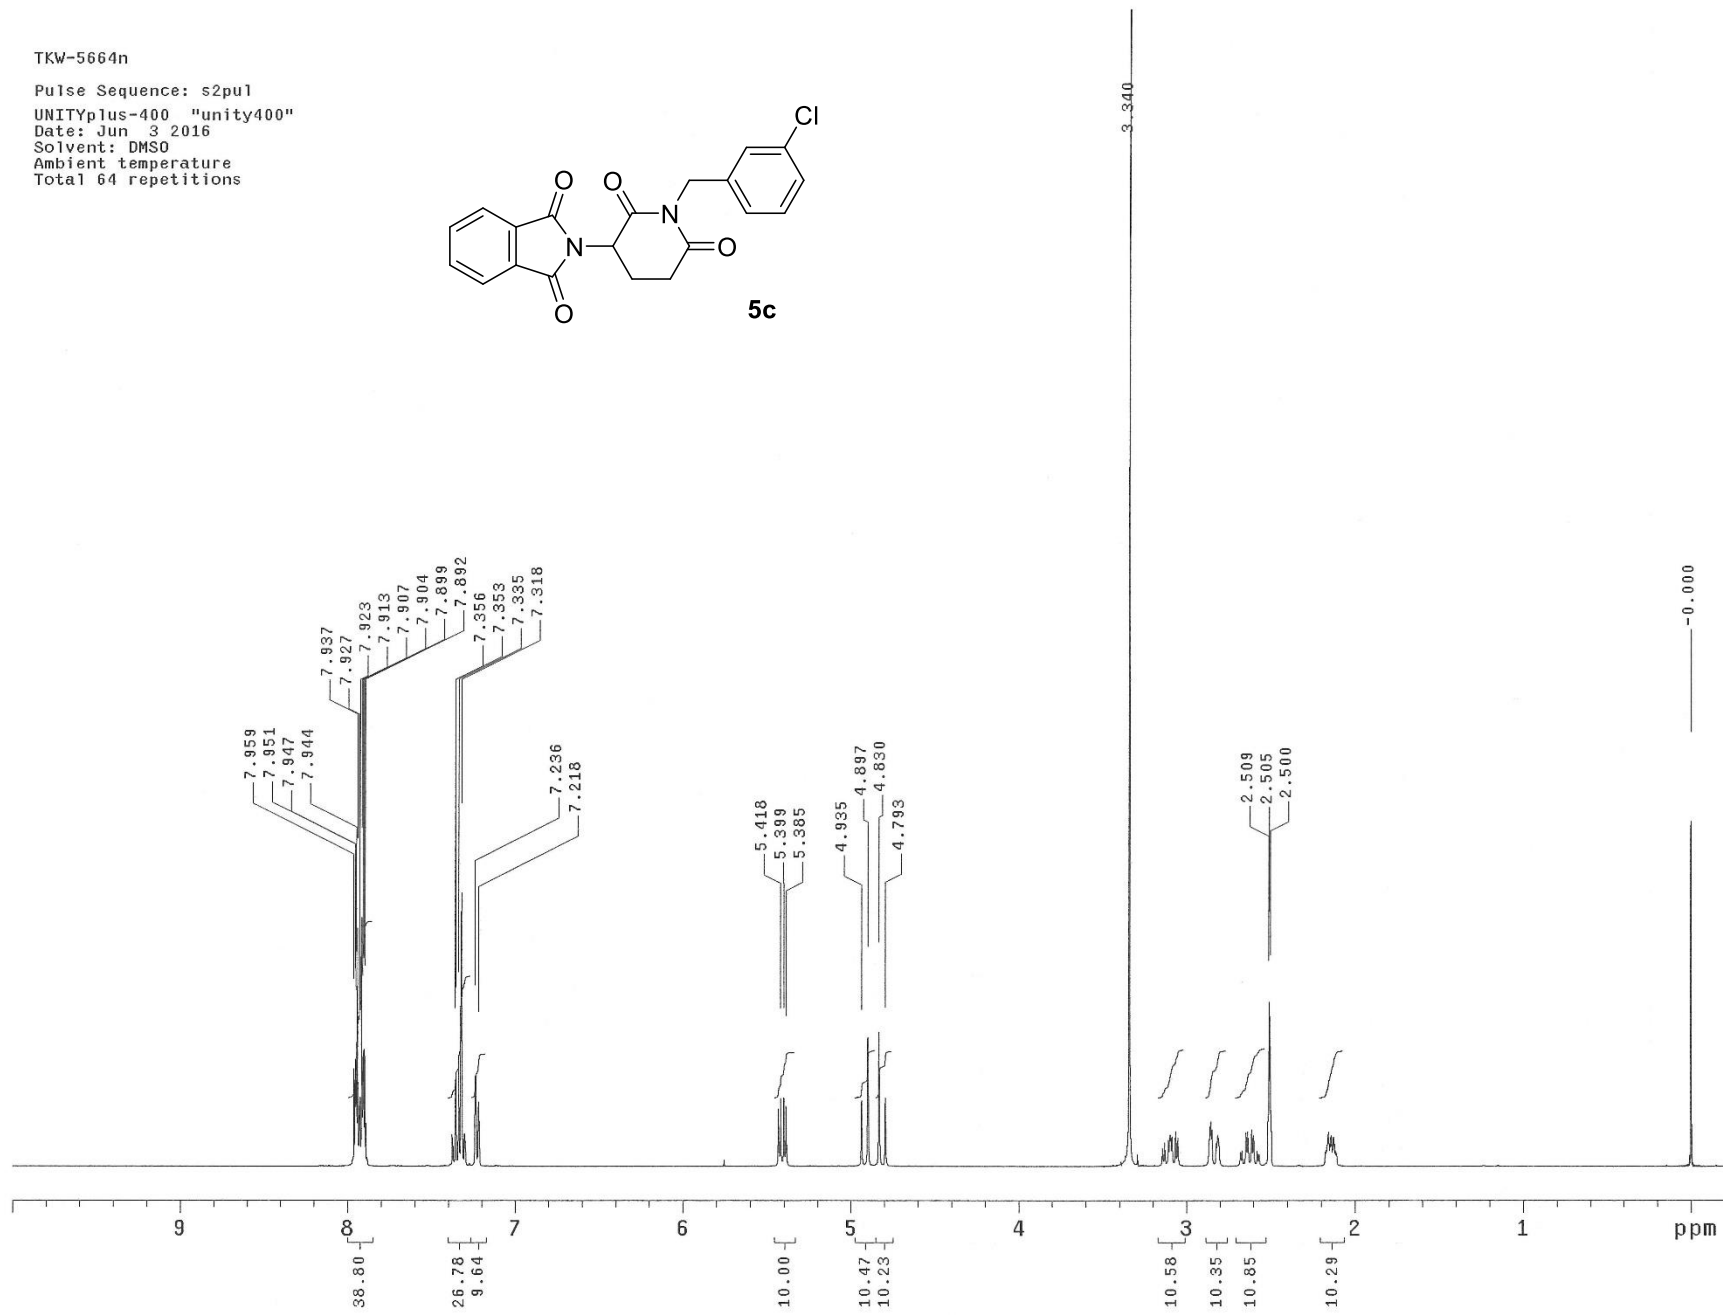

TKW-5664n

Pulse Sequence: s2pu1

UNITYplus-400 "unity400"

Date: Jun 3 2016

Solvent: DMSO

Ambient temperature

Total 2272 repetitions

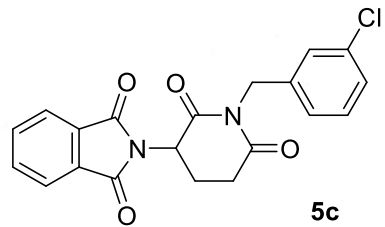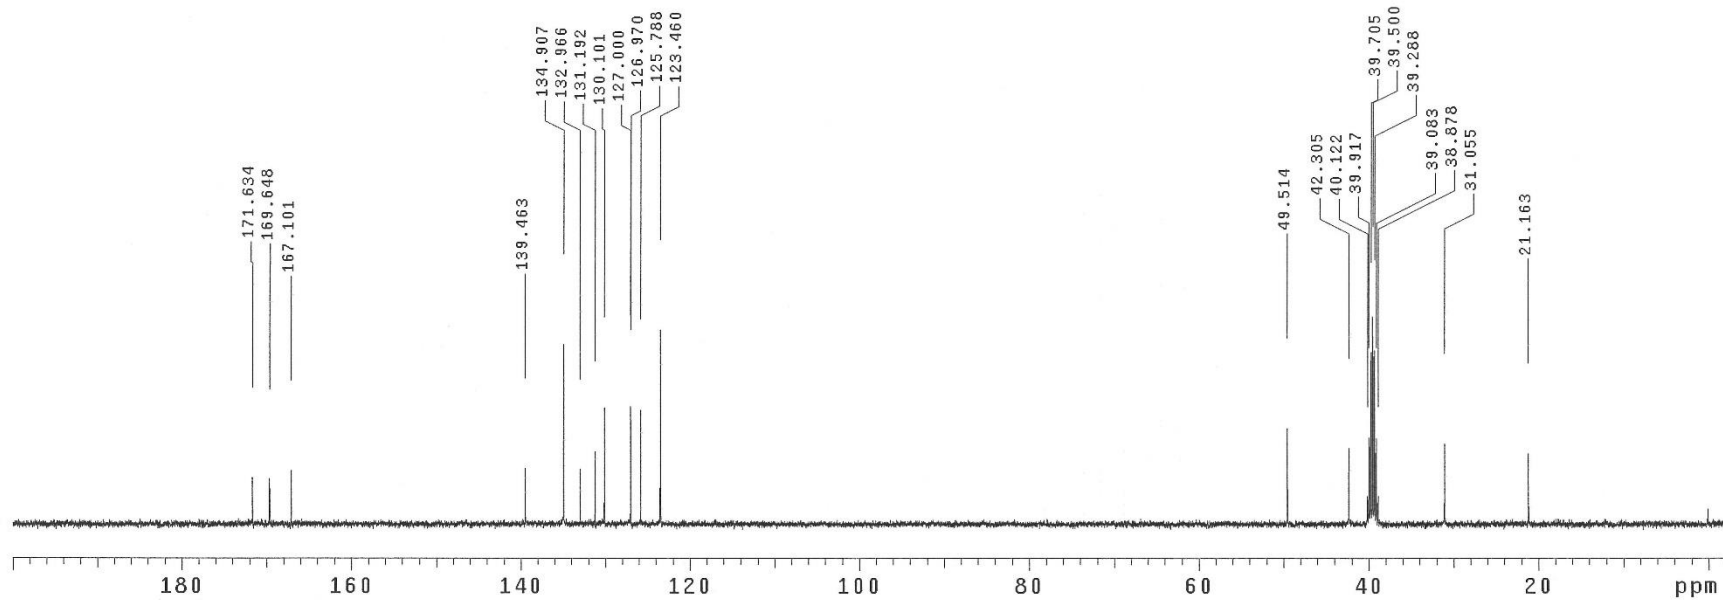

TKW-5663m

Pulse Sequence: s2pu1

UNITYplus-400 "unity400"

Date: Jun 3 2016

Solvent: DMSO

Ambient temperature

Total 64 repetitions

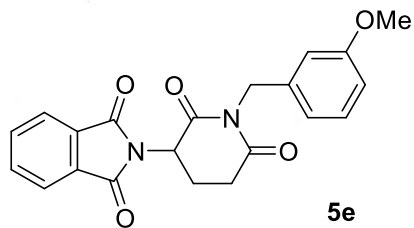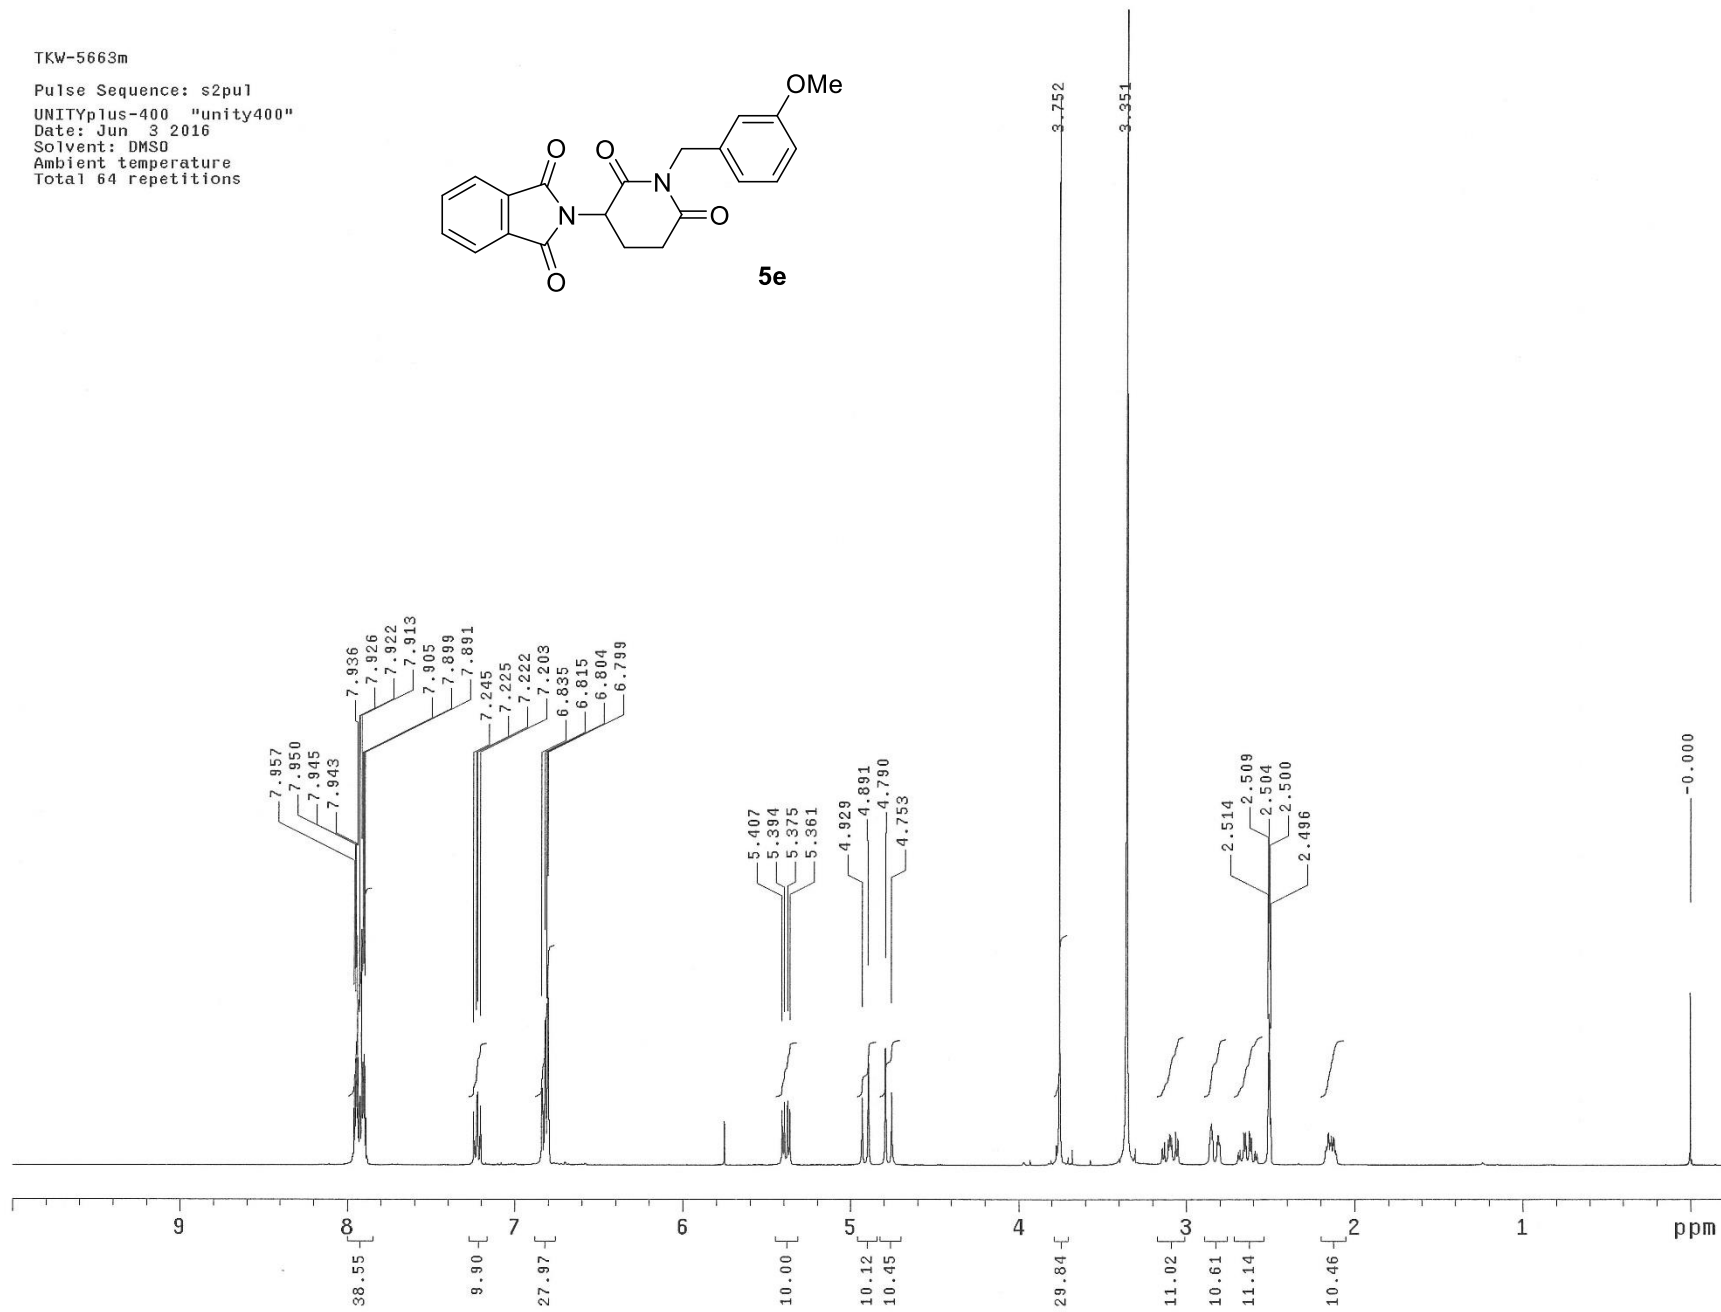

TKW-5663m

Pulse Sequence: s2pu1  
UNITYplus-400 "unity400"  
Date: Jun 3 2016  
Solvent: DMSO  
Ambient temperature  
Total 4096 repetitions

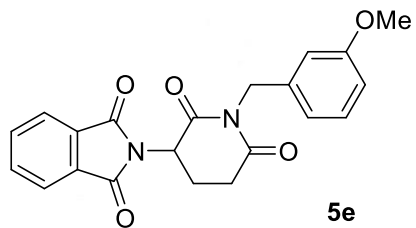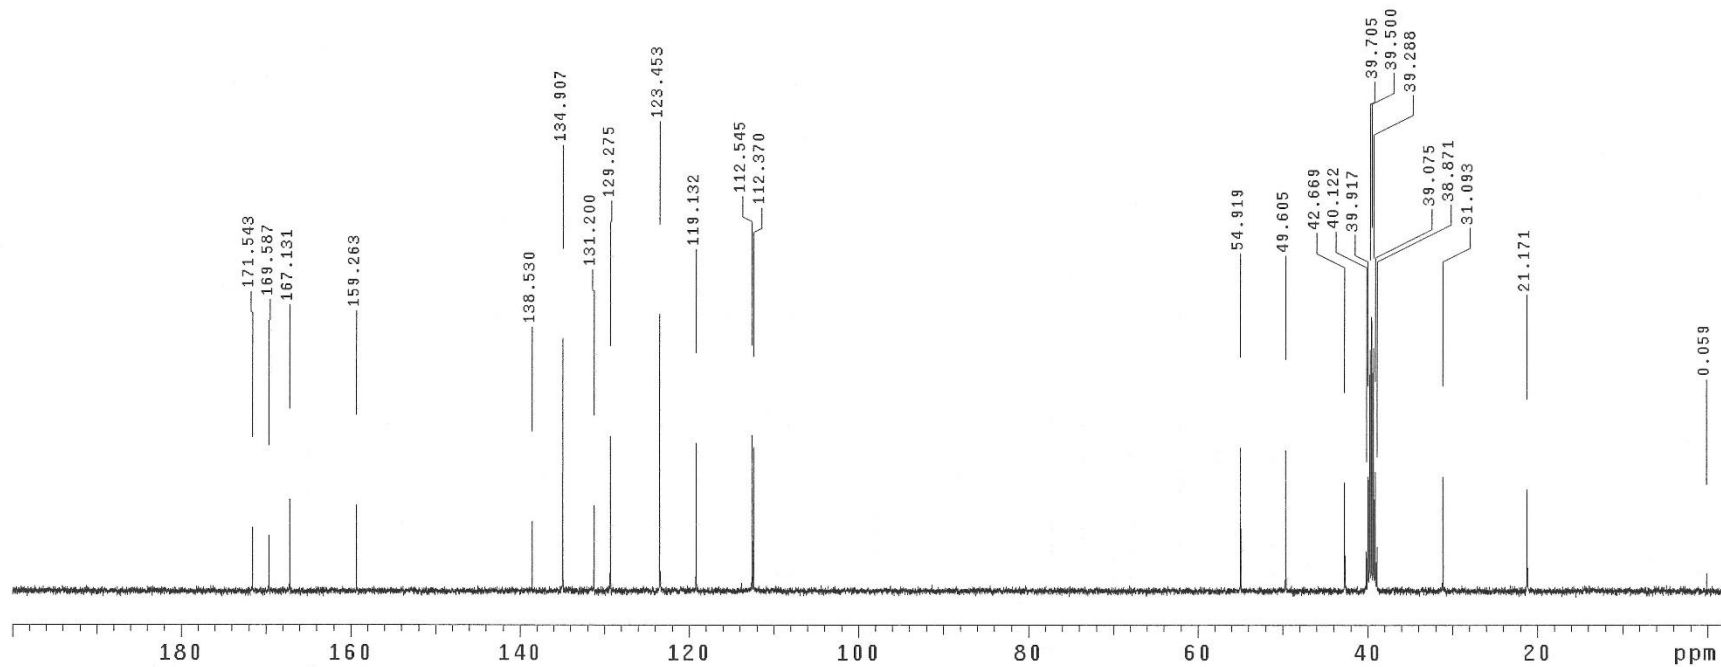



TKW-5665o

Pulse Sequence: s2pu1  
Mercury-400BB "MerPlus400"  
Date: Jun 24 2016  
Solvent: dms0  
Ambient temperature  
Total 64 repetitions

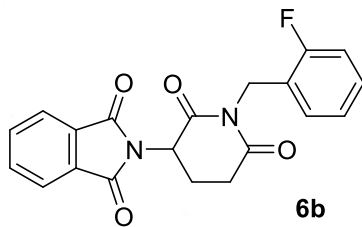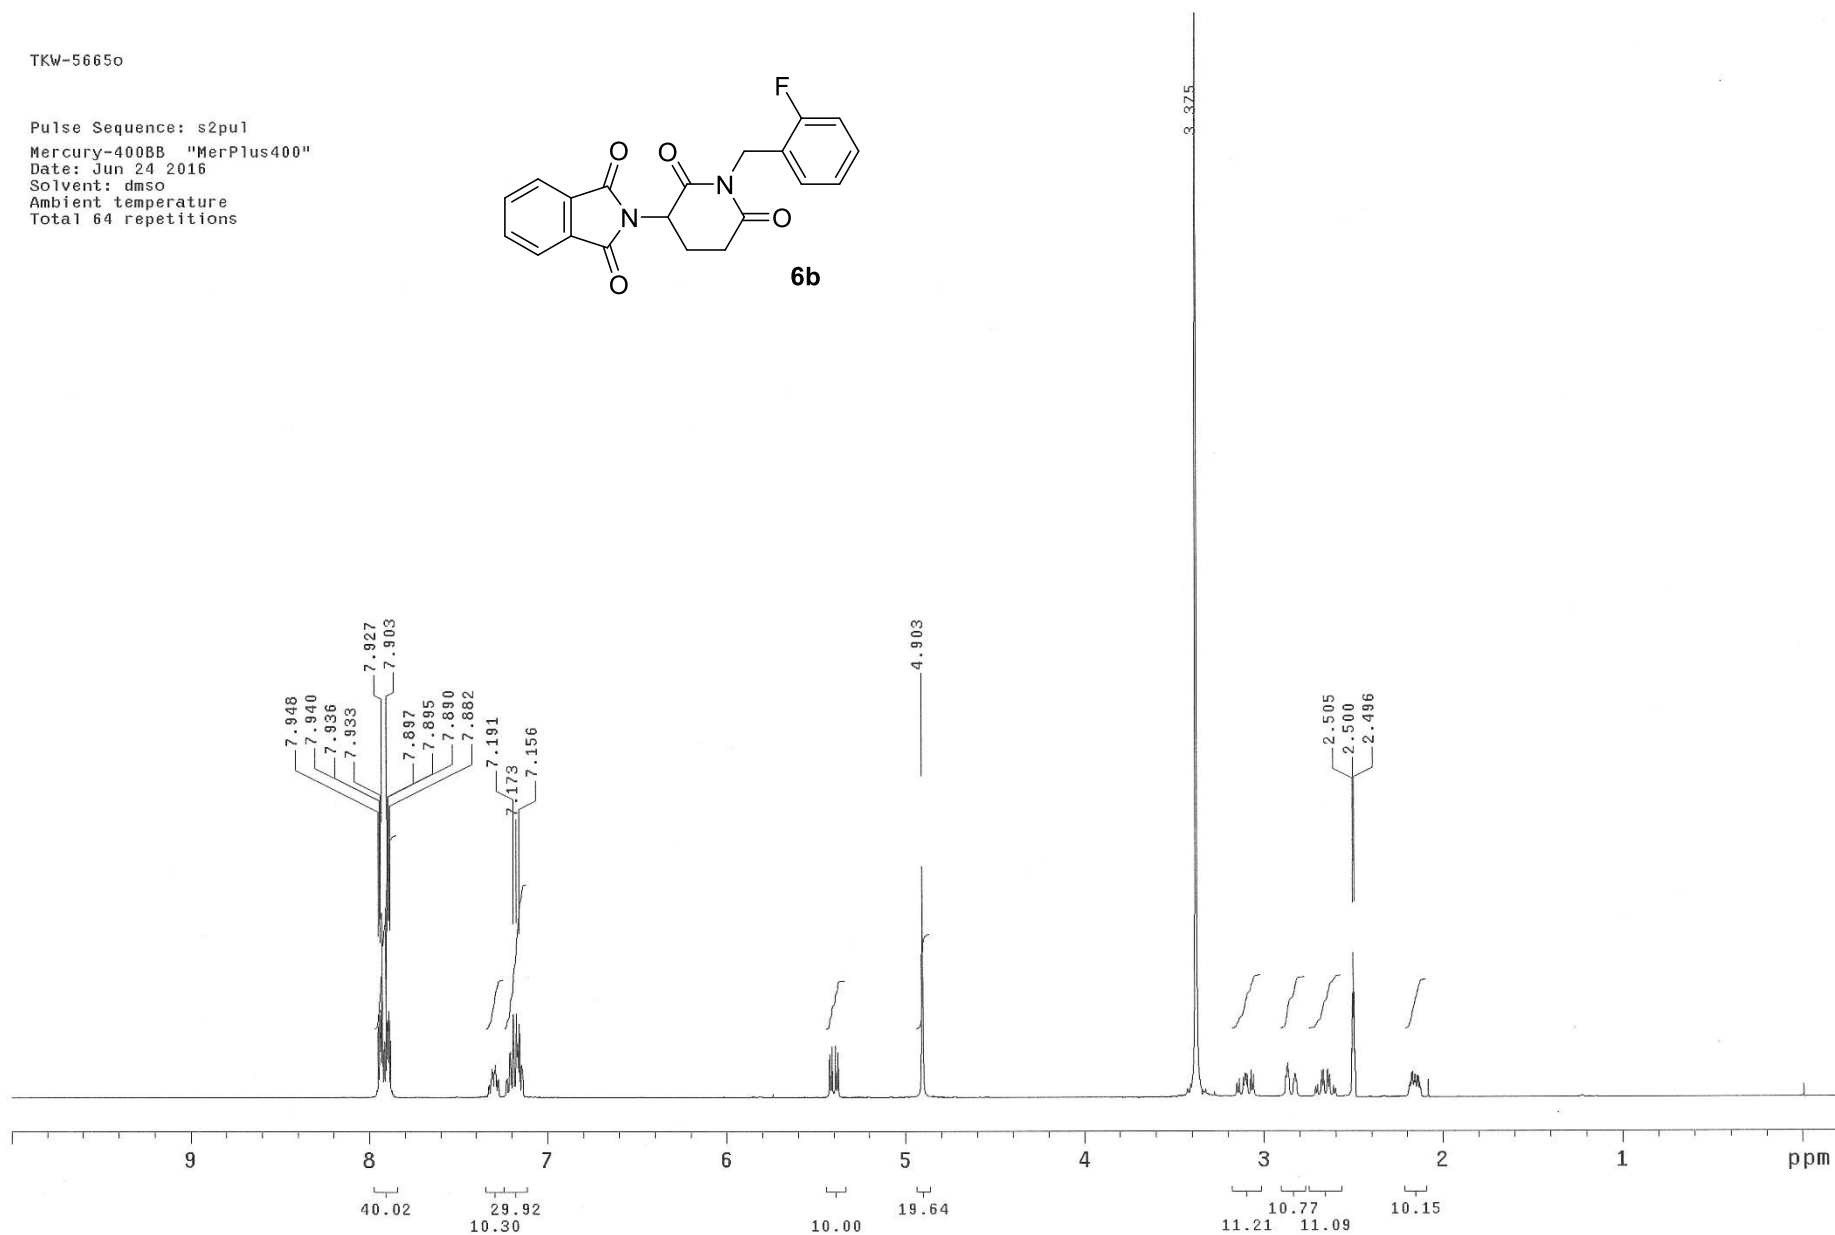

TKW-5665o

Pulse Sequence: s2pu1  
Mercury-400BB "MerPlus400"  
Date: Jun 24 2016  
Solvent: dmsd  
Ambient temperature  
Total 64000 repetitions

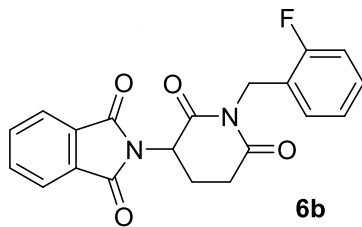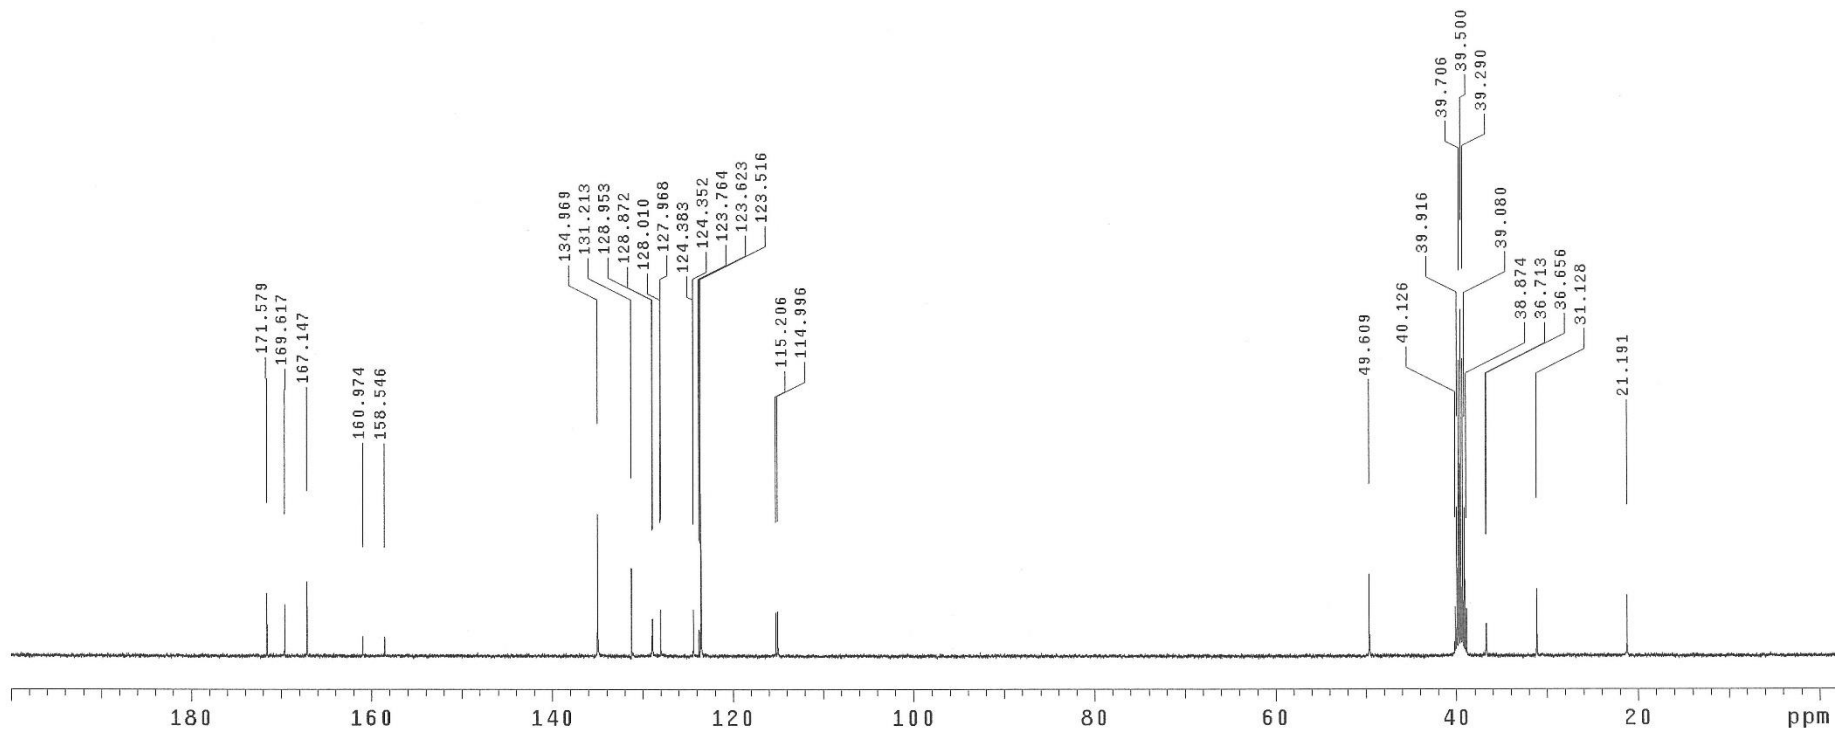

TKW-5682f

Pulse Sequence: s2pu1

UNITYplus-400 "unity400"

Date: Nov 11 2016

Solvent: DMSO

Ambient temperature

Total 80 repetitions

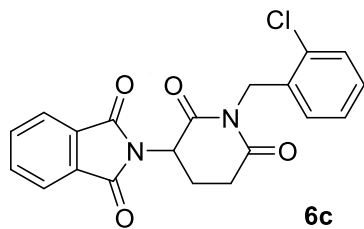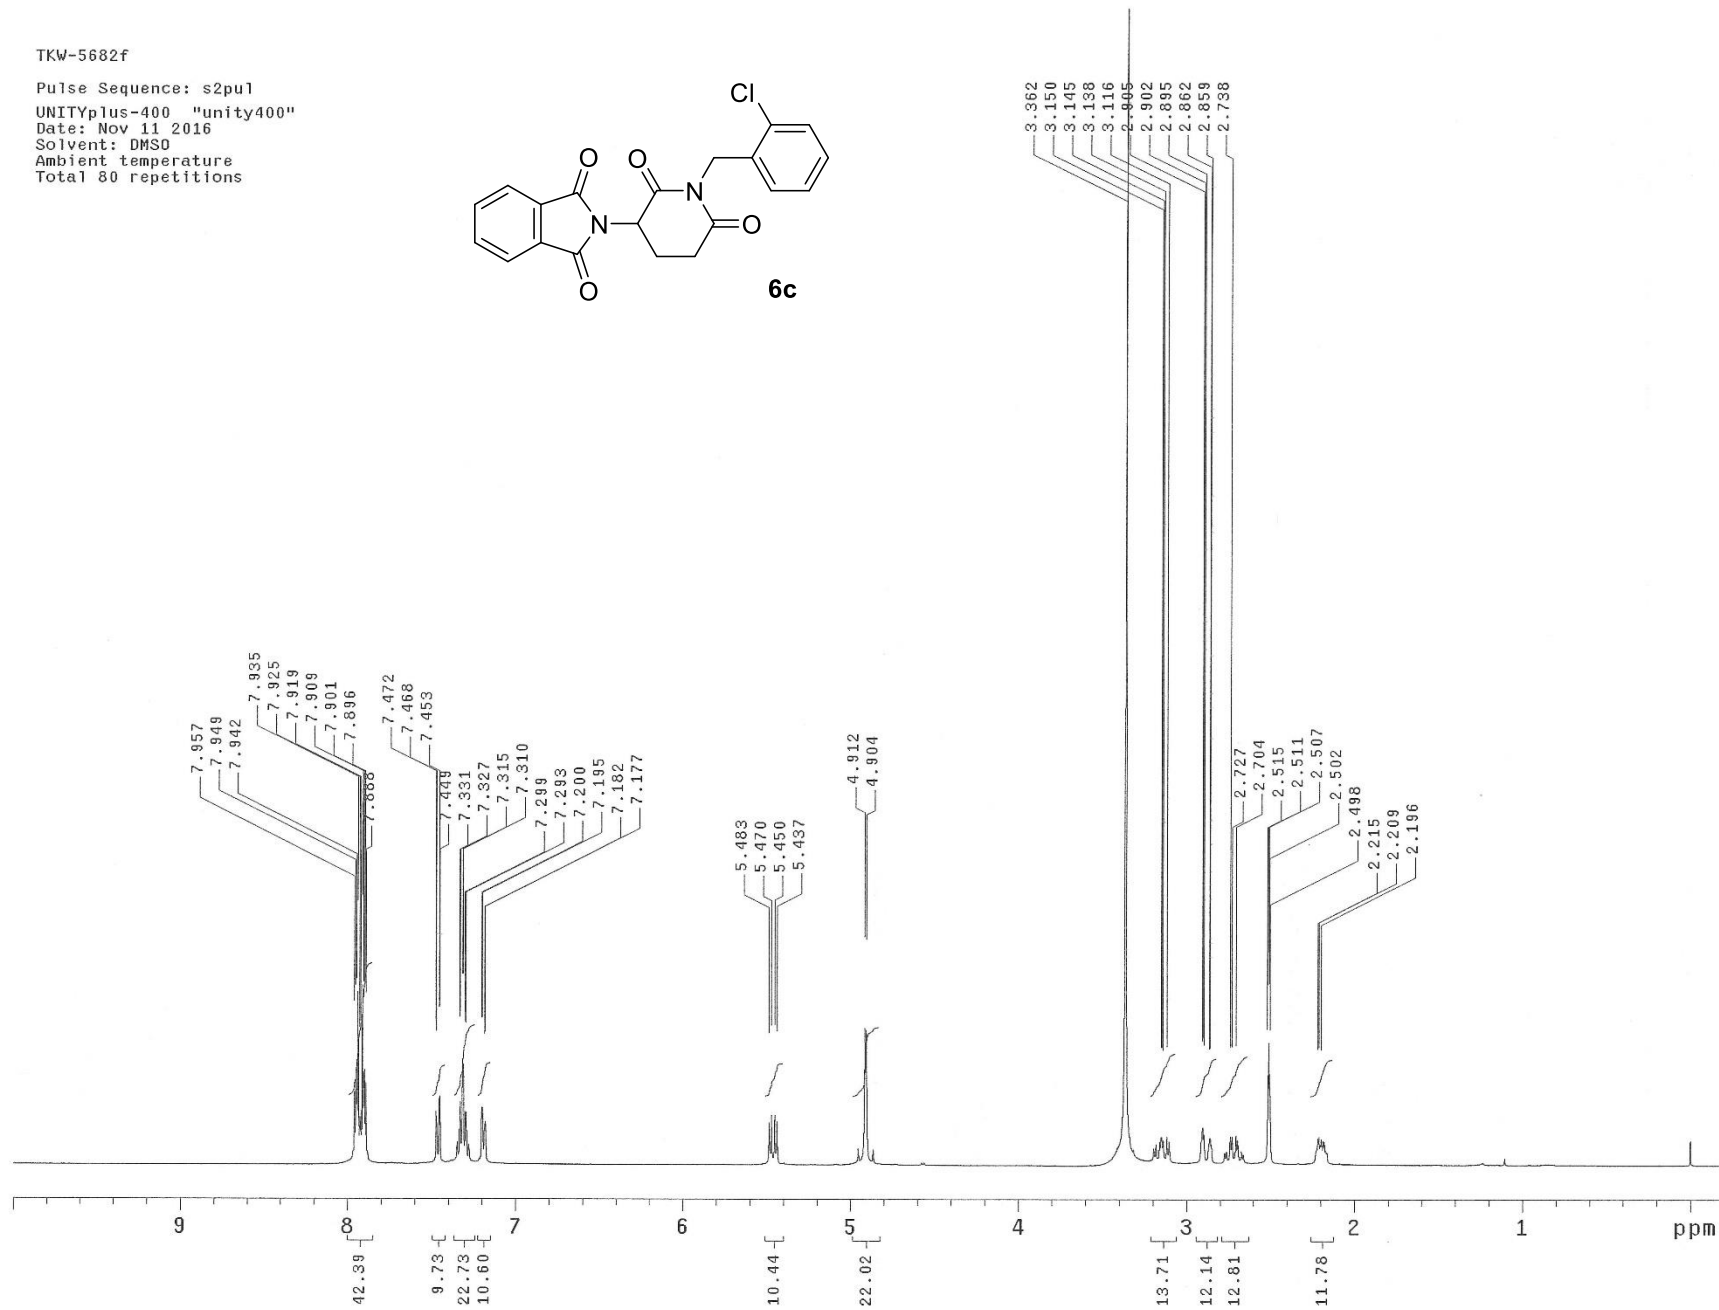

TKW-5682f

Pulse Sequence: s2pu1  
UNITYplus-400 "unity400"  
Date: Nov 11 2016  
Solvent: DMSO  
Ambient temperature  
Total 16000 repetitions

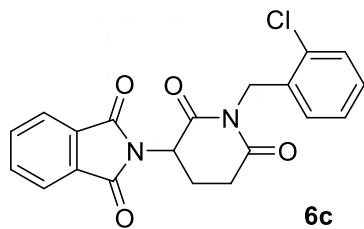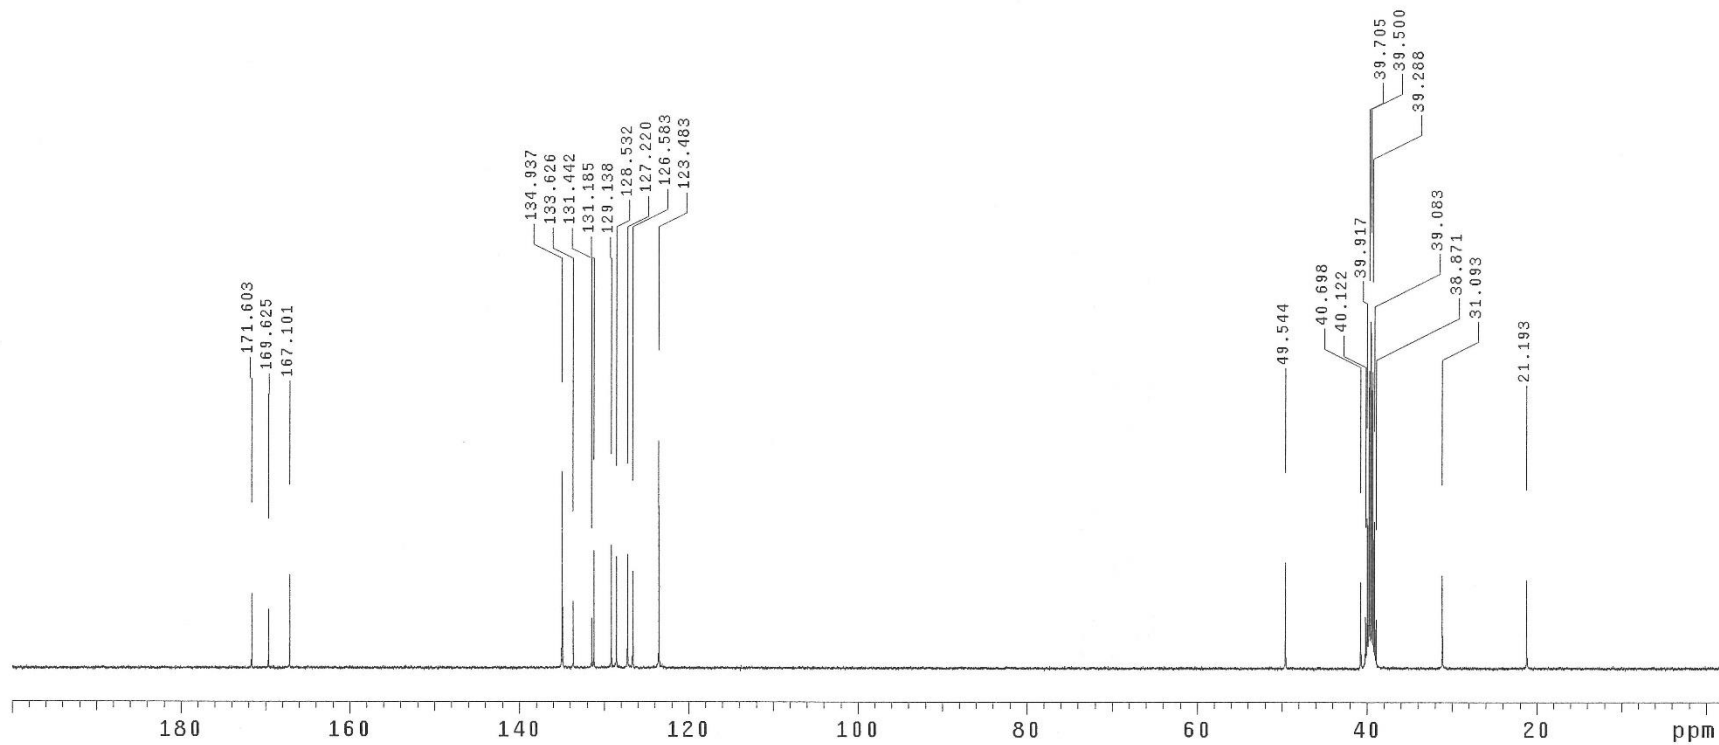

TKW-5916p

Pulse Sequence: s2pu1  
UNITYplus-400 "unity400"  
Date: Jan 26 2018  
Solvent: DMSO  
Ambient temperature  
Total 48 repetitions

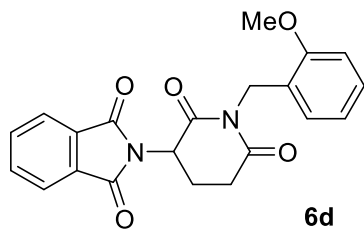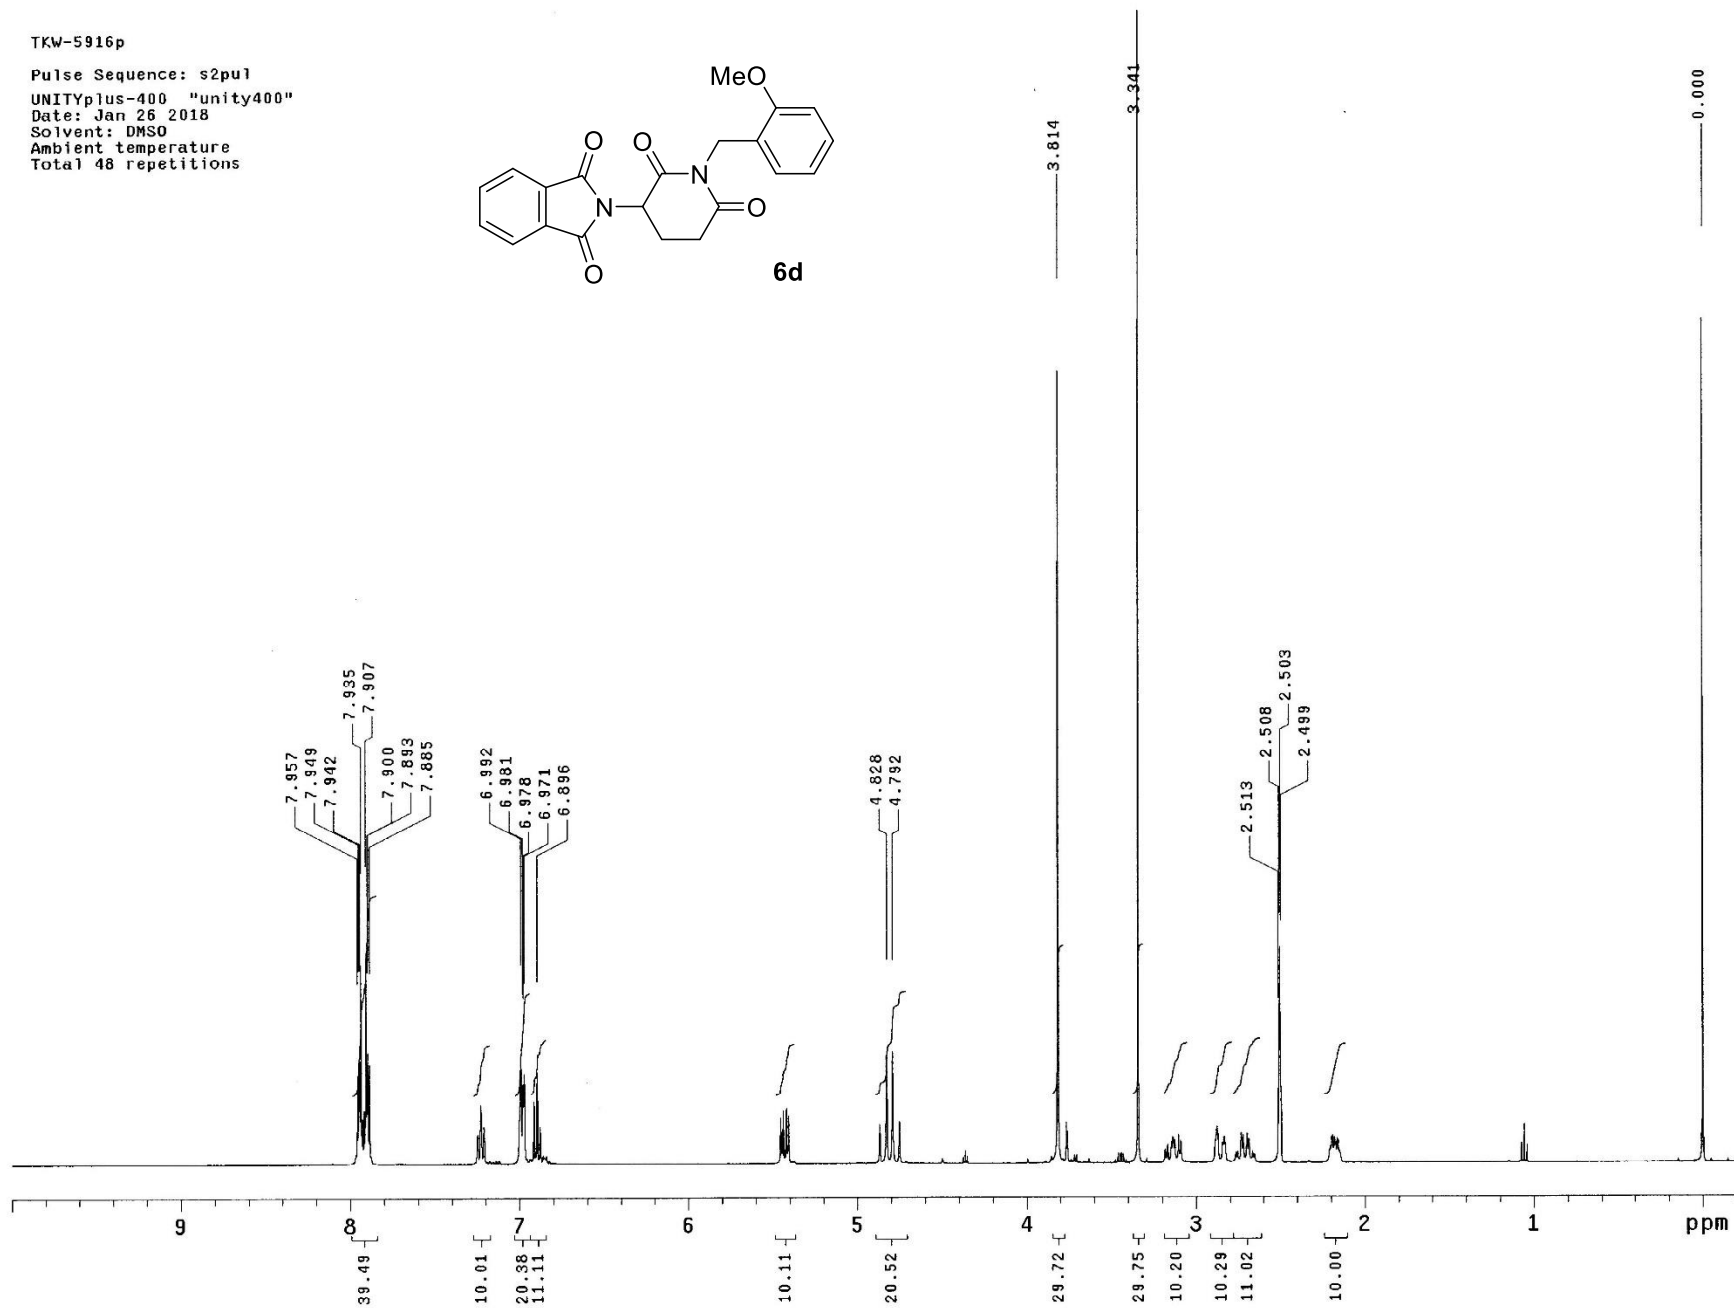

TKW-5916p

Pulse Sequence: s2pu1

UNITYplus-400 "unity400"

Date: Jan 26 2018

Solvent: DMSO

Ambient temperature

Total 16000 repetitions

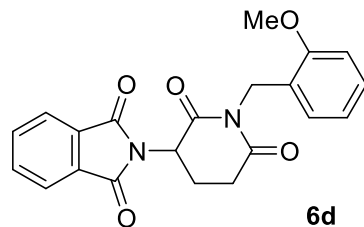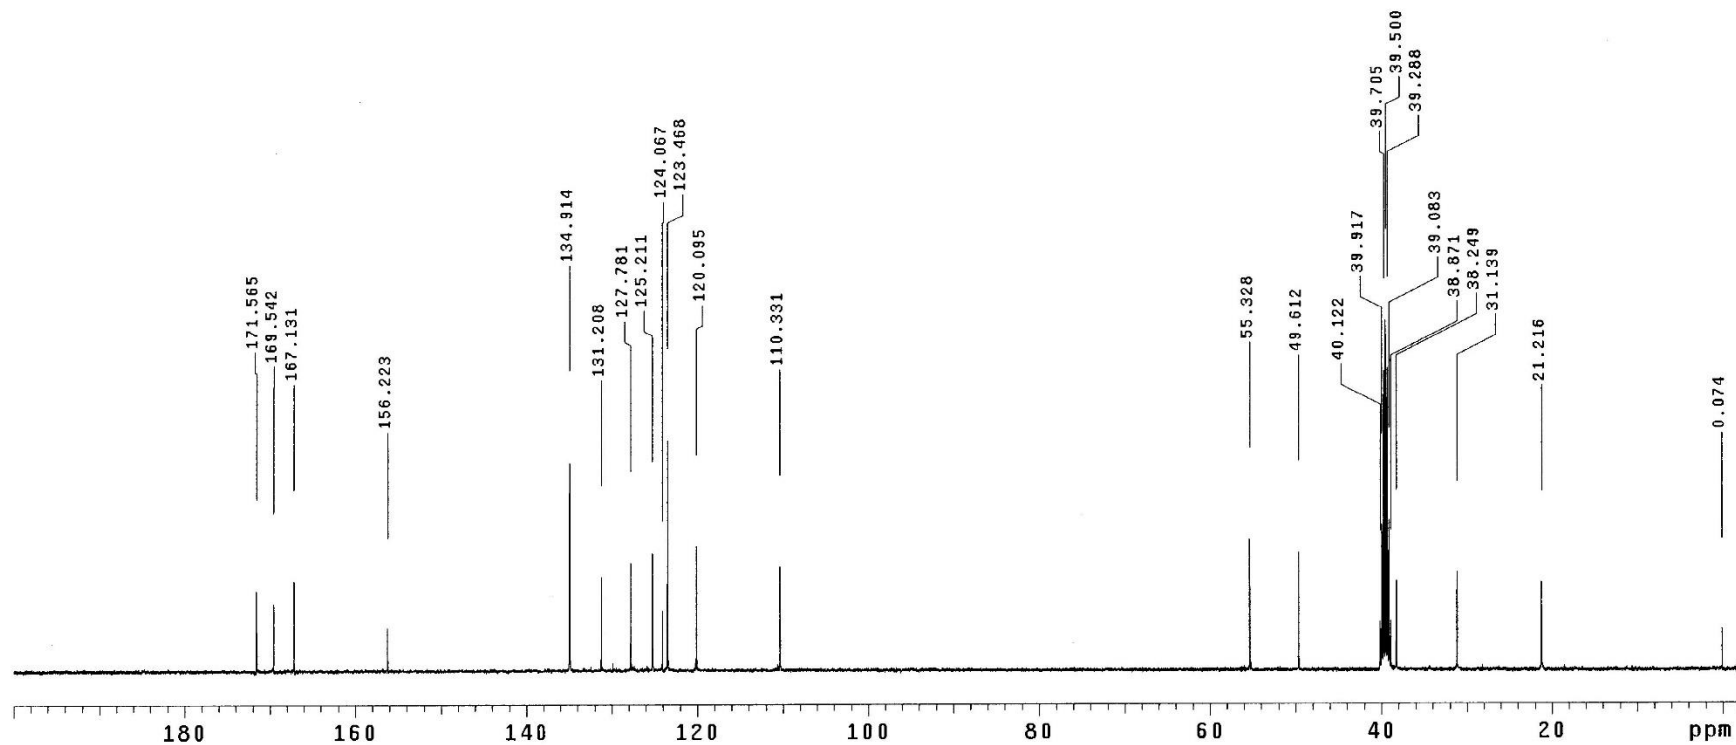

Supplement: ijms-19-03061-s001.pdf [file ijms-19-03061-s001.pdf]
